# Supplementary material for: Smaller babies at risk: birth weight impacts neonatal survival status in Silte zone, Central Ethiopia. A survival analysis of prospective cohort study
Source: Front Pediatr. 2024 Dec 12;12:1426901. doi: 10.3389/fped.2024.1426901 (PMC11669498; doi:10.3389/fped.2024.1426901)
Supplement: Supplementary file 1 [file Table1.xlsx]

## Sheet: Supplementary Table 1
N100	N1001	N101	N102	age_cat	N103	N104	N105	N106	N107	N108	N109	mat_occup	fath_occup	N110	N111	N112	N113	N114	N115	N116	N117	N118	N119	N120	N121	N122	N123	N124	N1241	N125	N1251	N126	N1261	N127	N1271	N128	N1281	N129	N1291	oc	cc	hc	sc	henc	dc	Wealth_index	cat_wealth	N201	N202
1	s0001	1	22	2	2	2	1	2	#NULL!	1	12000	1	1	1	1	1	0	1	1	0	1	0	0	0	1	1	0	0	#NULL!	0	#NULL!	0	#NULL!	0	#NULL!	0	#NULL!	0	#NULL!	0	0	0	0	0	0	-1.64444	2	2	#NULL!
1	t1001	1	33	2	2	1	1	2	#NULL!	3	99999	1	3	0	1	1	0	1	1	0	1	1	0	1	0	1	1	1	2	0	#NULL!	0	#NULL!	1	2	0	#NULL!	0	#NULL!	0	0	0	0	0	0	0.208359	3	1	3
1	w1002	1	30	2	2	1	1	2	#NULL!	3	400	1	3	1	1	0	0	1	1	1	1	0	1	0	1	1	1	1	1	1	1	1	1	1	1	1	11	1	1	0	0	0	0	1	0	2.93645	4	1	1
2	s0002	1	34	2	2	2	1	2	#NULL!	3	10000	1	2	0	0	1	0	0	1	1	1	0	0	1	1	1	1	0	#NULL!	0	#NULL!	0	#NULL!	0	#NULL!	0	#NULL!	0	#NULL!	0	0	0	0	0	0	-1.48476	2	2	#NULL!
2	t1002	1	30	2	2	2	1	2	#NULL!	2	5000	1	2	0	0	1	0	1	1	0	0	1	0	1	0	1	1	0	#NULL!	0	#NULL!	0	#NULL!	0	#NULL!	0	#NULL!	0	#NULL!	0	0	0	0	0	0	-2.35178	1	1	3
2	w1004	1	28	2	2	2	1	2	#NULL!	3	5000	1	3	0	0	1	0	1	1	1	1	1	0	1	0	1	0	0	#NULL!	0	#NULL!	0	#NULL!	0	#NULL!	0	#NULL!	0	#NULL!	0	0	0	0	0	0	-0.950913	2	1	3
3	t1003	1	20	2	2	3	1	2	#NULL!	3	99999	1	3	1	1	1	0	1	1	0	0	1	0	1	0	1	1	0	#NULL!	0	#NULL!	0	#NULL!	0	#NULL!	0	#NULL!	0	#NULL!	0	0	0	0	0	0	-0.62477	2	2	#NULL!
3	s0003	1	26	2	2	2	1	2	#NULL!	3	4000	1	3	0	0	0	0	1	1	0	1	0	0	1	0	1	1	0	#NULL!	0	#NULL!	0	#NULL!	0	#NULL!	0	#NULL!	0	#NULL!	0	0	0	0	0	0	-3.14836	1	1	4
3	w1005	1	20	2	2	2	1	2	2	3	5000	1	3	0	0	1	0	1	1	1	1	1	0	1	0	1	0	0	#NULL!	0	#NULL!	0	#NULL!	0	#NULL!	0	#NULL!	0	#NULL!	0	0	0	0	0	0	-0.950913	2	1	#NULL!
4	s0004	1	29	2	2	3	1	1	3000	1	2250	1	1	0	0	1	0	1	1	1	1	0	0	1	0	1	1	0	#NULL!	0	#NULL!	0	#NULL!	0	#NULL!	0	#NULL!	0	#NULL!	0	0	0	0	0	0	-2.32192	1	2	#NULL!
4	t1004	1	28	2	2	2	1	2	#NULL!	3	99999	1	3	0	1	1	0	1	1	0	0	1	0	1	0	1	1	0	#NULL!	0	#NULL!	0	#NULL!	0	#NULL!	1	3	0	#NULL!	0	0	0	0	0	0	-0.872376	2	1	3
4	w1008	1	29	2	2	3	1	1	2	3	4000	1	3	1	1	1	1	1	1	1	0	1	0	1	0	1	0	1	2	0	#NULL!	0	2	0	#NULL!	0	#NULL!	0	#NULL!	0	0	0	0	0	0	0.990942	3	1	3
5	t1005	1	20	2	2	4	3	1	4000	1	99999	3	1	0	0	1	0	1	0	0	0	1	0	1	0	1	0	0	#NULL!	0	#NULL!	0	#NULL!	0	#NULL!	0	#NULL!	0	#NULL!	0	0	0	0	0	0	-3.27948	1	2	#NULL!
5	s0005	1	27	2	2	3	1	2	#NULL!	3	4000	1	3	0	0	1	0	1	1	1	1	1	0	1	0	0	1	1	3	1	4	0	#NULL!	1	5	1	6	1	3	1	1	0	1	1	1	4.06178	4	2	#NULL!
5	w1009	1	26	2	2	2	1	1	2	1	3000	1	1	0	0	1	1	0	1	1	0	1	0	1	0	1	1	0	#NULL!	0	#NULL!	0	#NULL!	0	#NULL!	0	#NULL!	0	#NULL!	0	0	0	0	0	0	-0.736069	2	1	1
6	s0006	1	30	2	2	2	1	2	#NULL!	1	2000	1	1	1	1	1	0	1	1	1	1	0	0	1	0	0	1	1	2	1	4	0	#NULL!	1	3	1	5	1	2	0	1	0	0	1	1	3.08817	4	2	#NULL!
6	t1006	1	20	2	2	2	1	2	#NULL!	2	6000	1	2	0	0	1	0	1	1	1	1	1	0	1	0	1	0	0	#NULL!	0	#NULL!	0	#NULL!	0	#NULL!	0	#NULL!	0	#NULL!	0	0	0	0	0	0	-0.950913	2	1	3
6	w1011	1	24	2	2	2	1	2	#NULL!	3	#NULL!	1	3	0	0	1	0	1	1	1	1	1	0	1	0	1	0	0	#NULL!	0	#NULL!	0	#NULL!	0	#NULL!	0	#NULL!	0	#NULL!	0	0	0	0	0	0	-0.950913	2	1	1
7	s0007	1	26	2	2	2	1	2	#NULL!	3	16000	1	3	1	1	1	1	1	1	1	1	1	0	1	0	1	1	1	6	1	5	0	#NULL!	1	3	1	4	0	#NULL!	1	1	0	0	1	0	6.42665	4	2	#NULL!
7	t1007	1	20	2	2	2	1	2	#NULL!	1	99999	1	1	0	0	1	0	1	0	0	0	1	0	1	0	0	1	0	#NULL!	0	#NULL!	0	#NULL!	0	#NULL!	0	#NULL!	0	#NULL!	0	0	0	0	0	0	-3.27948	1	1	3
7	w1012	1	35	2	2	3	1	2	#NULL!	3	5000	1	3	0	0	1	0	1	1	1	1	1	1	0	0	1	1	0	#NULL!	0	#NULL!	0	#NULL!	0	#NULL!	0	#NULL!	0	#NULL!	0	0	0	0	0	0	-1.8584	1	1	3
8	s0008	1	18	1	2	2	1	2	#NULL!	3	4650	1	2	0	0	1	0	1	0	1	1	1	0	1	0	0	1	0	#NULL!	0	#NULL!	0	#NULL!	0	#NULL!	0	#NULL!	0	#NULL!	0	0	0	0	0	0	-1.87861	1	2	#NULL!
8	w1013	1	32	2	2	2	1	2	#NULL!	3	#NULL!	1	3	0	0	1	0	1	1	1	0	1	0	1	0	1	0	0	#NULL!	0	#NULL!	0	#NULL!	0	#NULL!	0	#NULL!	0	#NULL!	0	0	0	0	0	0	-1.74386	1	2	#NULL!
8	t1008	1	20	2	2	4	3	1	4600	2	99999	3	2	1	1	1	0	1	1	1	1	1	0	1	0	1	1	0	#NULL!	0	#NULL!	0	#NULL!	0	#NULL!	1	3	0	#NULL!	0	0	0	0	0	0	1.3373	3	1	3
9	s0009	1	24	2	2	2	3	1	3000	3	10000	4	2	0	1	0	0	0	1	1	1	0	0	1	1	0	1	0	#NULL!	1	3	0	#NULL!	1	3	1	2	0	#NULL!	0	1	0	0	0	0	2.42964	4	2	#NULL!
9	w1015	1	25	2	2	3	1	2	#NULL!	3	3000	1	3	0	0	1	1	1	1	1	1	0	1	0	1	0	0	0	#NULL!	0	#NULL!	0	#NULL!	0	#NULL!	0	#NULL!	0	#NULL!	0	0	0	0	0	0	-1.38446	2	1	3
9	t1009	1	23	2	2	2	1	2	#NULL!	2	99999	1	2	1	1	1	0	1	1	1	0	1	0	1	0	1	1	0	#NULL!	0	#NULL!	0	#NULL!	0	#NULL!	0	#NULL!	0	#NULL!	0	0	0	0	0	0	-0.016846	3	1	3
10	s0010	1	29	2	2	2	1	2	#NULL!	3	2000	1	3	0	0	1	0	1	1	1	1	0	1	1	1	0	1	0	#NULL!	0	#NULL!	0	#NULL!	1	5	1	4	1	2	0	0	0	1	1	1	0.765076	3	2	#NULL!
10	t1010	1	21	2	2	2	1	2	#NULL!	2	6000	1	2	0	0	1	0	1	0	0	0	1	0	1	0	1	1	0	#NULL!	0	#NULL!	0	#NULL!	0	#NULL!	0	#NULL!	0	#NULL!	0	0	0	0	0	0	-3.27948	1	2	#NULL!
10	w1017	1	34	2	1	1	3	2	#NULL!	3	3000	3	2	0	0	1	0	1	1	1	0	1	0	1	0	1	0	0	#NULL!	0	#NULL!	0	#NULL!	0	#NULL!	0	#NULL!	0	#NULL!	0	0	0	0	0	0	-1.74386	1	1	3
11	t1011	1	26	2	2	4	3	1	4609	2	1200	3	2	1	1	1	0	1	1	1	1	1	0	1	0	1	0	0	#NULL!	0	#NULL!	0	#NULL!	0	#NULL!	0	#NULL!	0	#NULL!	0	0	0	0	0	0	0.776098	3	2	#NULL!
11	w1019	1	32	2	2	3	3	2	#NULL!	2	3000	3	2	0	0	1	0	1	1	1	0	1	0	1	0	1	0	0	#NULL!	0	#NULL!	0	#NULL!	0	#NULL!	0	#NULL!	0	#NULL!	0	0	0	0	0	0	-1.74386	1	1	1
11	s0011	1	30	2	2	4	3	1	9056	3	2000	3	3	1	1	1	0	1	1	1	1	0	0	1	0	1	1	0	#NULL!	0	#NULL!	0	#NULL!	0	#NULL!	0	#NULL!	0	#NULL!	0	0	0	0	0	0	-0.594905	2	1	3
12	s0012	1	20	2	2	2	1	2	#NULL!	2	3000	1	2	0	1	1	0	1	0	1	1	1	0	1	1	1	1	0	#NULL!	0	#NULL!	0	#NULL!	0	#NULL!	0	#NULL!	0	#NULL!	0	0	0	0	0	0	-0.12325	3	2	#NULL!
12	w1020	1	31	2	2	4	1	2	#NULL!	2	4000	1	2	0	0	0	1	1	1	1	1	1	1	0	1	0	1	0	#NULL!	0	#NULL!	0	#NULL!	0	#NULL!	0	#NULL!	0	#NULL!	0	0	0	0	0	0	-0.231974	2	1	3
12	t1012	1	28	2	2	2	1	2	#NULL!	1	99999	1	1	0	0	1	0	1	0	0	0	1	0	1	0	1	1	0	#NULL!	0	#NULL!	0	#NULL!	0	#NULL!	1	5	0	#NULL!	0	0	0	0	1	0	-2.61985	1	1	4
13	s0013	1	36	3	2	1	1	2	#NULL!	3	2000	1	2	1	1	0	0	1	1	1	1	0	0	1	0	1	0	0	#NULL!	0	#NULL!	0	#NULL!	0	#NULL!	0	#NULL!	0	#NULL!	0	0	0	0	0	0	-0.813424	2	2	#NULL!
13	w1021	2	26	2	1	1	2	2	#NULL!	3	4000	2	3	0	0	1	0	1	1	1	1	1	0	1	0	1	0	0	#NULL!	0	#NULL!	0	#NULL!	0	#NULL!	0	#NULL!	0	#NULL!	0	0	0	0	0	0	-0.950913	2	1	3
13	t1013	1	30	2	2	3	1	2	#NULL!	3	99999	1	3	1	1	1	0	1	1	1	1	1	0	1	0	1	0	0	#NULL!	0	#NULL!	0	#NULL!	0	#NULL!	0	#NULL!	0	#NULL!	0	0	0	0	0	0	0.776098	3	1	3
14	s0014	1	30	2	2	2	1	2	#NULL!	1	4700	1	1	0	1	0	0	0	1	0	0	1	0	1	0	0	1	0	#NULL!	0	#NULL!	0	#NULL!	0	#NULL!	0	#NULL!	0	#NULL!	0	0	0	0	0	0	-1.6521	2	2	#NULL!
14	t1014	1	18	1	2	3	1	2	#NULL!	3	99999	1	3	0	0	1	0	0	1	0	0	1	0	1	0	1	1	0	#NULL!	0	#NULL!	0	#NULL!	0	#NULL!	0	#NULL!	0	#NULL!	0	0	0	0	0	0	-2.35178	1	1	4
14	w1022	1	32	2	2	2	1	2	#NULL!	3	#NULL!	1	3	0	0	1	0	1	1	1	1	1	0	1	0	1	0	0	#NULL!	0	#NULL!	0	#NULL!	0	#NULL!	0	#NULL!	0	#NULL!	0	0	0	0	0	0	-0.950913	2	1	3
15	s0015	1	23	2	1	3	1	2	#NULL!	2	3500	1	2	0	0	1	0	0	1	0	0	1	1	1	0	1	1	0	#NULL!	1	1	0	#NULL!	0	#NULL!	1	1	0	#NULL!	0	0	0	0	0	0	-1.4193	2	2	#NULL!
15	t1015	1	20	2	2	2	1	2	#NULL!	3	99999	1	3	0	0	1	0	1	0	0	0	1	0	1	0	1	1	0	#NULL!	0	#NULL!	0	#NULL!	0	#NULL!	0	#NULL!	0	#NULL!	0	0	0	0	0	0	-3.27948	1	2	#NULL!
15	w1023	1	25	2	2	2	1	1	2	3	#NULL!	1	3	0	0	1	1	1	1	1	1	1	1	0	1	0	1	0	#NULL!	0	#NULL!	0	#NULL!	0	#NULL!	0	#NULL!	0	#NULL!	0	0	0	0	0	0	-0.013454	3	1	3
16	s0016	1	38	3	2	1	1	2	#NULL!	1	8500	1	1	0	0	1	0	1	1	1	1	0	1	1	0	1	1	1	3	0	#NULL!	0	#NULL!	1	4	1	2	1	1	1	0	0	1	0	0	1.15227	3	2	#NULL!
16	t1016	1	35	2	2	2	1	2	#NULL!	1	99999	1	1	0	1	1	0	1	1	1	0	1	1	1	0	1	1	0	#NULL!	0	#NULL!	1	1	1	6	0	#NULL!	0	#NULL!	0	0	0	1	0	0	2.34312	4	1	3
16	w1025	1	26	2	2	2	1	2	#NULL!	3	3000	1	2	0	0	1	0	1	1	1	0	1	1	0	1	0	1	0	#NULL!	0	#NULL!	0	#NULL!	0	#NULL!	0	#NULL!	0	#NULL!	0	0	0	0	0	0	-1.81419	1	1	3
17	s0017	1	35	2	2	2	1	2	#NULL!	3	3000	1	3	0	0	1	1	1	1	0	1	1	0	1	0	1	1	0	#NULL!	0	#NULL!	0	#NULL!	1	3	1	2	0	#NULL!	0	0	0	0	0	0	0.859146	3	2	#NULL!
17	t1017	1	24	2	2	4	3	1	99999	3	99999	4	3	0	1	1	0	1	1	1	1	1	0	1	0	1	0	0	#NULL!	0	#NULL!	0	#NULL!	0	#NULL!	0	#NULL!	0	#NULL!	0	0	0	0	0	0	-0.03271	3	1	4
17	w1026	1	21	2	2	4	3	2	#NULL!	2	5000	3	2	0	0	1	0	1	1	1	1	1	0	1	0	1	0	0	#NULL!	0	#NULL!	0	#NULL!	0	#NULL!	0	#NULL!	0	#NULL!	0	0	0	0	0	0	-0.950913	2	1	3
18	w1028	1	21	2	2	2	1	2	#NULL!	2	2000	1	2	1	0	1	0	1	1	1	1	1	1	0	1	1	0	0	#NULL!	0	#NULL!	0	#NULL!	0	#NULL!	0	#NULL!	0	#NULL!	0	0	0	0	0	0	-0.212434	2	1	3
18	s0018	1	25	2	2	3	3	1	3000	2	7000	4	2	1	1	1	0	1	1	1	1	1	0	1	1	1	1	0	#NULL!	0	#NULL!	0	#NULL!	0	#NULL!	0	#NULL!	0	#NULL!	0	0	0	0	0	0	1.61325	4	1	3
18	t1018	1	27	2	2	1	1	2	#NULL!	3	99999	1	3	0	0	1	0	1	0	0	0	1	0	1	0	1	0	0	#NULL!	0	#NULL!	0	#NULL!	0	#NULL!	0	#NULL!	0	#NULL!	0	0	0	0	0	0	-3.27948	1	1	4
19	w1029	1	20	2	2	3	3	2	#NULL!	3	3000	3	2	0	0	1	0	1	1	1	1	1	0	1	0	1	0	0	#NULL!	0	#NULL!	0	#NULL!	0	#NULL!	0	#NULL!	0	#NULL!	0	0	0	0	0	0	-0.950913	2	1	3
19	s0019	1	38	3	2	4	3	1	9050	2	16000	3	2	1	1	1	0	1	1	1	1	1	0	0	1	1	1	0	#NULL!	0	#NULL!	0	#NULL!	0	#NULL!	0	#NULL!	0	#NULL!	0	0	0	0	0	0	0.334486	3	2	#NULL!
19	t1019	1	17	1	2	3	1	2	#NULL!	3	99999	1	3	0	0	1	0	1	0	1	0	1	0	1	0	1	1	0	#NULL!	0	#NULL!	0	#NULL!	0	#NULL!	0	#NULL!	0	#NULL!	0	0	0	0	0	0	-2.67155	1	2	#NULL!
20	t1020	1	24	2	1	3	1	2	#NULL!	3	99999	1	3	1	1	1	0	1	0	1	1	1	0	1	0	1	1	0	#NULL!	0	#NULL!	0	#NULL!	0	#NULL!	0	#NULL!	0	#NULL!	0	0	0	0	0	0	-0.151596	3	1	4
20	s0020	1	23	2	2	1	1	2	#NULL!	3	8000	1	3	0	1	1	1	1	1	1	1	0	0	1	0	0	0	0	#NULL!	0	#NULL!	0	#NULL!	0	#NULL!	0	#NULL!	0	#NULL!	0	0	0	0	0	0	-0.395925	2	1	3
20	w1032	1	35	2	2	2	1	2	#NULL!	1	3000	1	1	0	0	0	0	1	0	0	0	0	0	0	1	0	0	0	#NULL!	0	#NULL!	0	#NULL!	0	#NULL!	0	#NULL!	0	#NULL!	0	0	0	0	0	0	-5.31061	1	1	3
21	t1021	1	20	2	2	3	3	2	#NULL!	3	4000	1	3	0	0	1	0	1	1	1	1	0	0	1	0	1	0	0	#NULL!	0	#NULL!	0	#NULL!	0	#NULL!	0	#NULL!	0	#NULL!	0	0	0	0	0	0	-2.32192	1	2	#NULL!
21	s0021	1	32	2	2	2	3	1	5000	3	5000	4	3	1	1	1	0	1	1	1	1	0	0	1	0	1	0	0	#NULL!	0	#NULL!	0	#NULL!	0	#NULL!	0	#NULL!	0	#NULL!	0	0	0	0	0	0	-0.594905	2	2	#NULL!
21	w1033	1	27	2	2	2	1	2	#NULL!	3	#NULL!	1	3	0	0	1	0	1	1	1	0	1	0	1	0	1	0	0	#NULL!	0	#NULL!	0	#NULL!	0	#NULL!	0	#NULL!	0	#NULL!	0	0	0	0	0	0	-1.74386	1	1	3
22	s0022	1	28	2	1	1	1	2	#NULL!	1	9000	1	1	0	0	1	0	1	1	0	1	0	0	1	0	1	1	1	5	0	#NULL!	0	#NULL!	0	#NULL!	0	#NULL!	0	#NULL!	1	0	0	0	0	0	-1.60022	2	2	#NULL!
22	w1034	1	24	2	2	3	1	2	#NULL!	3	6000	1	3	0	0	1	0	1	1	1	0	1	0	1	0	1	0	0	#NULL!	0	#NULL!	0	#NULL!	0	#NULL!	0	#NULL!	0	#NULL!	0	0	0	0	0	0	-1.74386	1	1	3
22	t1022	1	18	1	2	2	1	2	#NULL!	1	99999	1	1	0	0	1	0	1	1	0	0	1	0	1	0	1	0	0	#NULL!	0	#NULL!	0	#NULL!	0	#NULL!	1	1	0	#NULL!	0	0	0	0	0	0	-1.79058	1	1	3
23	s0023	2	20	2	2	2	1	2	#NULL!	3	6000	1	2	0	0	0	0	0	1	1	1	1	0	1	0	1	1	0	#NULL!	0	#NULL!	0	#NULL!	0	#NULL!	0	#NULL!	0	#NULL!	0	0	0	0	0	0	-1.16943	2	2	#NULL!
23	w1035	1	34	2	2	2	1	2	#NULL!	3	4000	1	3	1	0	1	0	1	1	1	1	1	1	0	1	0	1	0	#NULL!	0	#NULL!	0	#NULL!	0	#NULL!	0	#NULL!	0	#NULL!	0	0	0	0	0	0	-0.212434	2	1	4
23	t1023	1	22	2	2	1	1	2	#NULL!	3	99999	1	3	1	1	1	0	1	1	1	1	1	0	1	0	1	1	1	1	1	2	0	#NULL!	0	#NULL!	1	2	0	#NULL!	0	0	0	0	0	0	1.3373	3	1	3
24	s0024	1	23	2	2	2	1	2	#NULL!	3	4000	1	3	0	1	0	0	1	0	1	1	1	1	1	0	0	0	0	#NULL!	0	#NULL!	0	#NULL!	1	1	0	#NULL!	0	#NULL!	0	0	0	0	0	0	0.041351	3	1	3
24	t1024	1	19	1	2	3	3	1	1000	2	5000	3	2	1	1	1	0	1	1	1	1	1	0	1	0	1	1	0	#NULL!	0	#NULL!	0	#NULL!	0	#NULL!	0	#NULL!	0	#NULL!	0	0	0	0	0	0	0.776098	3	1	3
24	w1037	1	30	2	2	1	1	2	#NULL!	1	6000	1	1	0	0	1	0	1	1	1	0	1	0	1	0	1	1	1	3	1	2	0	#NULL!	1	8	1	2	1	1	1	0	0	1	0	0	1.35905	3	1	3
25	s0025	1	23	2	2	4	1	2	#NULL!	2	8000	1	2	0	0	1	0	1	1	1	1	0	0	1	0	1	0	0	#NULL!	0	#NULL!	0	#NULL!	0	#NULL!	0	#NULL!	0	#NULL!	0	0	0	0	0	0	-2.32192	1	2	#NULL!
25	t1025	1	19	1	2	2	1	2	#NULL!	1	99999	1	1	0	1	1	0	1	0	0	0	1	0	1	0	1	1	0	#NULL!	0	#NULL!	0	#NULL!	0	#NULL!	0	#NULL!	0	#NULL!	0	0	0	0	0	0	-2.36127	1	2	#NULL!
25	w1038	1	29	2	2	2	1	2	#NULL!	1	5000	1	1	0	0	1	0	1	1	1	0	1	0	1	0	1	0	0	#NULL!	0	#NULL!	0	#NULL!	0	#NULL!	0	#NULL!	0	#NULL!	0	0	0	0	0	0	-1.74386	1	1	3
26	s0026	1	22	2	2	4	1	2	#NULL!	3	4000	1	2	0	1	1	1	1	1	1	1	0	0	1	0	1	0	1	4	0	#NULL!	0	#NULL!	0	#NULL!	0	#NULL!	0	#NULL!	1	0	0	0	0	0	0.933697	3	2	#NULL!
26	w1039	1	25	2	2	2	1	2	#NULL!	3	4000	1	3	0	0	1	0	1	1	1	0	1	0	1	0	1	0	1	22	0	#NULL!	0	#NULL!	0	2	0	#NULL!	0	#NULL!	1	0	0	0	0	0	-0.414235	2	1	3
26	t1026	1	25	2	2	2	1	2	#NULL!	1	99999	1	1	1	1	1	0	1	0	1	0	1	0	1	0	1	1	0	#NULL!	0	#NULL!	0	#NULL!	0	#NULL!	0	#NULL!	0	#NULL!	0	0	0	0	0	0	-0.944541	2	1	3
27	s0027	1	33	2	2	3	1	2	#NULL!	2	8000	1	2	0	0	0	0	1	1	1	1	0	0	1	0	1	1	1	2	1	2	0	#NULL!	0	#NULL!	0	#NULL!	1	2	0	0	0	0	0	1	-2.1705	1	2	#NULL!
27	t1027	1	23	2	2	2	1	2	#NULL!	2	4000	1	2	0	0	1	0	1	1	0	0	1	0	1	0	1	1	1	2	0	#NULL!	0	#NULL!	1	2	0	#NULL!	1	1	0	0	0	0	0	0	-1.1397	2	1	3
27	w1040	1	37	3	2	2	1	2	#NULL!	3	4000	1	3	1	1	1	1	1	1	1	1	1	1	1	1	0	0	0	#NULL!	0	#NULL!	0	#NULL!	0	#NULL!	0	#NULL!	0	#NULL!	0	0	0	0	0	0	2.99232	4	1	3
28	s0028	1	24	2	2	2	3	1	6000	3	8000	4	3	0	0	0	0	1	1	0	1	0	0	1	0	1	1	0	#NULL!	0	#NULL!	0	#NULL!	0	#NULL!	1	5	0	#NULL!	0	0	0	0	1	0	-2.48873	1	2	#NULL!
28	t1028	1	25	2	2	2	1	2	#NULL!	1	99999	1	1	0	1	1	0	1	0	0	0	1	0	1	0	1	0	0	#NULL!	0	#NULL!	0	#NULL!	0	#NULL!	0	#NULL!	0	#NULL!	0	0	0	0	0	0	-2.36127	1	2	#NULL!
28	w1041	1	21	2	2	1	1	2	#NULL!	3	#NULL!	1	3	0	0	1	1	1	1	1	0	1	0	1	0	0	0	0	#NULL!	0	#NULL!	0	#NULL!	0	#NULL!	0	#NULL!	0	#NULL!	0	0	0	0	0	0	-0.736069	2	1	3
29	t1029	1	20	2	2	3	3	1	99999	3	99999	4	3	1	1	1	0	1	1	1	1	1	0	1	0	1	0	0	#NULL!	1	1	0	#NULL!	1	5	0	#NULL!	0	#NULL!	0	0	0	1	0	0	1.62509	4	2	#NULL!
29	s0029	1	28	2	2	2	1	2	#NULL!	3	2000	1	3	1	1	0	1	1	1	0	1	0	1	1	1	1	0	0	#NULL!	0	#NULL!	0	#NULL!	0	#NULL!	1	5	1	2	0	0	0	0	1	1	1.82444	4	1	3
29	w1042	1	29	2	2	2	1	2	#NULL!	3	2000	1	3	0	0	1	0	1	1	1	0	1	0	1	0	0	0	0	#NULL!	0	#NULL!	0	#NULL!	0	#NULL!	0	#NULL!	0	#NULL!	0	0	0	0	0	0	-1.74386	1	1	3
30	s0030	1	30	2	2	4	3	1	3000	2	10000	3	2	1	1	1	0	1	1	0	1	1	0	1	1	1	0	0	#NULL!	0	#NULL!	0	#NULL!	0	#NULL!	0	#NULL!	0	#NULL!	0	0	0	0	0	0	1.00533	3	1	3
30	t1030	1	25	2	2	3	1	2	#NULL!	1	99999	1	1	0	0	1	0	1	1	1	0	1	0	1	0	1	1	1	2	0	#NULL!	0	#NULL!	0	#NULL!	0	#NULL!	0	#NULL!	0	0	0	0	0	0	-1.74386	1	1	3
30	w1043	1	24	2	1	2	1	2	#NULL!	3	4000	1	3	0	0	1	0	1	1	1	1	1	0	1	0	1	0	0	#NULL!	0	#NULL!	0	#NULL!	0	#NULL!	0	#NULL!	0	#NULL!	0	0	0	0	0	0	-0.950913	2	1	3
31	s0031	1	30	2	2	4	3	1	6000	2	8081	3	2	1	1	1	1	1	1	1	1	1	1	0	1	1	0	1	1	0	#NULL!	0	#NULL!	1	1	1	4	0	#NULL!	0	0	0	0	1	0	3.22218	4	1	3
31	t1031	1	27	2	2	2	1	2	#NULL!	1	99999	1	1	1	1	1	0	1	1	1	0	1	0	1	0	1	1	0	#NULL!	0	#NULL!	0	#NULL!	0	#NULL!	0	#NULL!	0	#NULL!	0	0	0	0	0	0	-0.016846	3	1	3
31	w1044	2	25	2	2	1	1	2	#NULL!	3	2000	1	3	0	0	1	0	1	1	0	0	1	0	1	0	1	0	0	#NULL!	0	#NULL!	0	#NULL!	0	#NULL!	0	#NULL!	0	#NULL!	0	0	0	0	0	0	-2.35178	1	1	4
32	s0032	1	22	2	2	2	1	2	#NULL!	2	7071	1	2	0	0	1	1	1	1	1	1	0	0	1	0	1	0	0	#NULL!	0	#NULL!	0	#NULL!	0	#NULL!	0	#NULL!	0	#NULL!	0	0	0	0	0	0	-1.31413	2	2	#NULL!
32	t1032	1	24	2	2	3	1	2	#NULL!	2	4000	1	2	0	0	1	0	1	1	0	0	1	0	1	0	1	1	0	#NULL!	0	#NULL!	0	#NULL!	0	#NULL!	1	1	0	#NULL!	0	0	0	0	0	0	-1.79058	1	1	4
32	w1045	1	30	2	2	3	1	2	#NULL!	3	6000	1	3	0	0	1	1	1	1	1	1	1	1	1	1	1	1	0	#NULL!	0	#NULL!	0	#NULL!	0	#NULL!	0	#NULL!	0	#NULL!	0	0	0	0	0	0	1.26531	3	1	3
33	s0033	1	16	1	2	2	1	2	#NULL!	3	6000	1	3	0	0	1	0	1	1	0	0	1	0	1	1	0	1	1	1	1	2	0	#NULL!	1	8	0	#NULL!	0	#NULL!	0	0	0	1	0	0	-0.665633	2	2	#NULL!
33	w1046	1	25	2	2	2	1	2	#NULL!	3	8000	1	3	0	0	1	0	1	1	1	1	0	1	0	1	0	1	0	#NULL!	0	#NULL!	0	#NULL!	0	#NULL!	0	#NULL!	0	#NULL!	0	0	0	0	0	0	-2.39224	1	2	#NULL!
33	t1033	1	26	2	2	2	1	2	#NULL!	1	99999	1	1	1	0	1	0	1	1	1	1	1	0	1	0	1	1	0	#NULL!	0	#NULL!	0	#NULL!	0	#NULL!	0	#NULL!	0	#NULL!	0	0	0	0	0	0	-0.142105	3	1	3
34	s0034	1	28	2	2	2	1	2	#NULL!	3	2000	1	2	0	0	1	0	1	1	1	0	1	0	1	0	1	1	0	#NULL!	0	#NULL!	0	#NULL!	0	#NULL!	0	#NULL!	0	#NULL!	0	0	0	0	0	0	-1.74386	1	1	3
34	t1034	1	25	2	2	2	1	2	#NULL!	3	99999	1	3	0	0	1	0	1	1	0	0	1	0	1	0	1	1	0	#NULL!	0	#NULL!	0	#NULL!	0	#NULL!	0	#NULL!	0	#NULL!	0	0	0	0	0	0	-2.35178	1	1	3
34	w1048	1	30	2	2	3	1	2	#NULL!	3	3000	1	3	0	0	1	0	1	1	1	1	1	1	0	1	0	1	0	#NULL!	0	#NULL!	0	#NULL!	0	#NULL!	0	#NULL!	0	#NULL!	0	0	0	0	0	0	-1.02124	2	1	3
35	s0035	1	22	2	2	2	1	2	#NULL!	3	7000	1	3	1	1	0	1	0	1	1	1	0	0	1	0	1	0	0	#NULL!	0	#NULL!	0	#NULL!	0	#NULL!	0	#NULL!	0	#NULL!	0	0	0	0	0	0	0.194364	3	2	#NULL!
35	t1035	1	20	2	2	2	1	2	#NULL!	3	99999	1	3	1	1	1	0	1	1	1	1	1	0	1	0	1	0	0	#NULL!	0	#NULL!	0	#NULL!	0	#NULL!	0	#NULL!	0	#NULL!	0	0	0	0	0	0	0.776098	3	2	#NULL!
35	w1049	1	30	2	2	4	3	2	#NULL!	2	4000	3	2	0	0	1	1	1	1	1	1	1	0	1	0	1	1	0	2	0	#NULL!	0	#NULL!	0	#NULL!	0	#NULL!	0	#NULL!	0	0	0	0	0	0	0.056875	3	1	3
36	s0036	1	26	2	2	2	1	2	#NULL!	3	20000	1	2	0	0	1	0	1	1	0	1	0	0	1	0	1	0	0	#NULL!	0	#NULL!	0	#NULL!	0	#NULL!	0	#NULL!	0	#NULL!	0	0	0	0	0	0	-2.92984	1	1	3
36	t1036	1	28	2	2	2	1	2	#NULL!	3	99999	1	3	1	1	1	0	1	1	1	0	1	0	1	0	1	1	0	#NULL!	0	#NULL!	0	#NULL!	0	#NULL!	0	#NULL!	0	#NULL!	0	0	0	0	0	0	-0.016846	3	1	3
36	w1051	1	30	2	2	2	1	2	#NULL!	1	4000	1	1	0	0	1	0	1	1	1	1	1	1	1	0	1	0	0	2	0	#NULL!	0	#NULL!	0	#NULL!	0	#NULL!	0	#NULL!	0	0	0	0	0	0	-0.57963	2	1	4
37	s0037	2	25	2	2	1	1	2	#NULL!	1	3500	1	1	0	0	0	1	0	0	0	0	1	0	1	0	0	1	1	3	1	4	1	2	1	2	1	1	1	1	1	1	0	0	0	0	4.36571	4	2	#NULL!
37	t1037	1	17	1	2	3	1	2	#NULL!	2	6091	1	2	0	1	1	0	1	1	0	0	1	0	1	0	1	1	0	#NULL!	0	#NULL!	0	#NULL!	0	#NULL!	1	1	0	#NULL!	0	0	0	0	0	0	-0.872376	2	1	3
37	w1053	1	20	2	2	3	1	2	#NULL!	2	4000	1	2	0	0	1	0	1	1	1	1	1	1	0	1	1	0	0	#NULL!	0	#NULL!	0	#NULL!	0	#NULL!	0	#NULL!	0	#NULL!	0	0	0	0	0	0	-1.02124	2	1	1
38	s0038	2	26	2	2	1	1	2	#NULL!	1	27000	1	1	1	1	0	1	1	1	1	1	0	1	1	1	1	1	1	5	1	5	0	#NULL!	1	3	1	10	1	2	1	1	0	0	1	1	6.4155	4	2	#NULL!
38	t1038	1	25	2	2	2	1	2	#NULL!	3	99999	1	3	0	1	1	0	1	1	1	0	1	0	1	0	1	1	1	2	0	#NULL!	0	#NULL!	1	1	0	#NULL!	0	#NULL!	0	0	0	0	0	0	0.023338	3	1	4
38	w1054	1	25	2	2	1	3	2	#NULL!	2	2500	3	2	0	0	1	0	1	1	1	1	1	1	0	0	1	0	0	#NULL!	0	#NULL!	0	#NULL!	0	#NULL!	0	#NULL!	0	#NULL!	0	0	0	0	0	0	-1.8584	1	1	4
39	s0039	2	20	2	2	1	1	2	#NULL!	3	3700	1	3	0	0	0	0	0	1	0	1	1	1	1	0	1	1	1	2	1	2	0	#NULL!	1	2	0	#NULL!	0	#NULL!	0	0	0	0	0	0	-0.557081	2	2	#NULL!
39	w1055	1	25	2	2	3	1	2	#NULL!	2	6000	1	2	0	0	1	0	1	1	1	1	1	1	0	0	1	0	0	2	0	2	0	2	0	2	0	#NULL!	0	#NULL!	0	0	0	0	0	0	-1.8584	1	2	#NULL!
39	t1039	1	17	1	2	2	1	2	#NULL!	3	99999	1	3	0	0	1	0	1	1	0	0	1	0	1	0	1	1	0	#NULL!	0	#NULL!	0	#NULL!	0	#NULL!	0	#NULL!	0	#NULL!	0	0	0	0	0	0	-2.35178	1	1	3
40	s0040	2	33	2	2	1	1	2	#NULL!	1	3750	1	1	1	1	0	0	1	0	1	1	1	0	1	0	1	1	1	3	1	2	0	#NULL!	1	7	1	6	1	1	1	0	0	1	1	0	2.83122	4	1	3
40	t1040	1	25	2	2	2	1	2	#NULL!	3	99999	1	3	0	1	1	0	1	1	1	1	1	0	1	0	1	0	0	#NULL!	0	#NULL!	0	#NULL!	0	#NULL!	0	#NULL!	0	#NULL!	0	0	0	0	0	0	-0.03271	3	1	3
40	w1056	1	31	2	2	2	1	2	#NULL!	3	8000	1	3	0	0	1	0	1	1	1	1	1	1	1	1	1	1	0	#NULL!	0	#NULL!	0	#NULL!	0	#NULL!	0	#NULL!	0	#NULL!	0	0	0	0	0	0	0.257525	3	1	3
41	s0041	2	36	3	2	1	1	2	#NULL!	3	2850	1	3	0	0	0	0	0	1	0	0	1	1	1	1	1	1	1	2	1	3	0	#NULL!	1	1	1	3	1	1	0	1	0	0	0	0	2.21594	4	2	#NULL!
41	w1057	1	27	2	2	2	1	1	2	2	9000	1	2	0	0	1	1	1	1	1	1	1	1	1	1	1	1	0	#NULL!	0	#NULL!	0	#NULL!	0	#NULL!	0	#NULL!	0	#NULL!	0	0	0	0	0	0	1.26531	3	1	3
41	t1041	1	30	2	2	2	1	2	#NULL!	1	99999	1	1	0	1	1	0	1	1	1	0	1	0	1	0	1	1	1	1	1	1	0	#NULL!	1	3	0	#NULL!	0	#NULL!	0	0	0	0	0	0	0.023338	3	1	4
42	s0042	2	17	1	2	1	1	2	#NULL!	3	3570	1	3	0	1	1	0	1	0	0	1	1	0	1	1	1	0	0	#NULL!	1	1	0	#NULL!	1	2	1	1	1	1	0	0	0	0	0	0	1.04211	3	2	#NULL!
42	w1058	1	23	2	2	2	1	1	2	3	8000	1	3	1	1	1	1	1	1	0	1	1	1	1	1	1	1	0	2	0	2	0	2	0	#NULL!	0	#NULL!	0	#NULL!	0	0	0	0	0	0	2.3844	4	2	#NULL!
42	t1042	1	19	1	2	2	1	2	#NULL!	3	99999	1	3	1	1	1	0	1	1	1	1	1	0	1	0	1	1	0	#NULL!	0	#NULL!	0	#NULL!	0	#NULL!	0	#NULL!	0	#NULL!	0	0	0	0	0	0	0.776098	3	2	#NULL!
43	s0043	2	30	2	2	1	1	2	#NULL!	1	8750	1	1	0	1	0	1	1	1	1	1	0	0	1	0	0	1	1	4	0	#NULL!	0	#NULL!	1	2	0	#NULL!	1	1	1	0	0	0	0	0	1.92726	4	2	#NULL!
43	w1059	1	35	2	2	1	1	2	#NULL!	3	7000	1	3	0	0	1	1	1	1	1	0	0	0	1	0	1	0	0	#NULL!	0	#NULL!	0	#NULL!	0	#NULL!	0	#NULL!	0	#NULL!	0	0	0	0	0	0	-2.10707	1	1	3
43	t1043	1	36	3	2	4	3	2	#NULL!	3	3000	3	2	1	1	1	0	1	1	1	1	1	0	1	0	1	0	0	#NULL!	0	#NULL!	0	#NULL!	0	#NULL!	0	#NULL!	0	#NULL!	0	0	0	0	0	0	0.776098	3	1	3
44	t1044	1	35	2	2	3	1	2	#NULL!	3	99999	1	3	1	1	1	0	1	1	1	1	1	0	1	0	1	1	1	2	0	#NULL!	0	#NULL!	1	3	0	#NULL!	0	#NULL!	0	0	0	0	0	0	1.62509	4	2	#NULL!
44	w1060	1	35	2	2	1	1	2	#NULL!	2	6000	1	2	0	0	1	0	1	1	1	1	0	0	1	0	1	0	0	#NULL!	0	#NULL!	0	#NULL!	0	#NULL!	0	#NULL!	0	#NULL!	0	0	0	0	0	0	-2.32192	1	2	#NULL!
44	s0044	2	22	2	2	1	1	2	#NULL!	1	3750	1	1	0	0	0	1	1	0	1	1	1	0	1	1	0	1	0	#NULL!	0	#NULL!	0	#NULL!	1	3	1	6	1	1	0	0	0	0	1	0	1.61953	4	1	3
45	s0045	2	27	2	2	2	1	2	#NULL!	1	4000	1	1	0	1	1	0	1	0	0	0	1	0	1	1	1	1	1	3	1	3	0	#NULL!	1	3	0	#NULL!	1	1	1	1	0	0	0	0	2.82211	4	1	3
45	t1045	1	27	2	2	4	3	1	99999	3	99999	4	3	1	1	1	0	1	1	1	1	1	0	1	0	1	0	0	#NULL!	0	#NULL!	0	#NULL!	0	#NULL!	0	#NULL!	0	#NULL!	0	0	0	0	0	0	0.776098	3	1	3
45	w1061	1	36	3	2	4	3	2	#NULL!	2	5000	3	2	0	0	1	1	1	1	1	1	1	1	1	1	0	1	0	12	0	2	0	#NULL!	0	#NULL!	0	#NULL!	0	#NULL!	1	0	0	0	0	0	2.59493	4	1	1
46	w1064	1	26	2	1	3	1	2	#NULL!	2	8000	1	2	0	0	1	0	1	1	1	1	1	0	1	0	1	0	0	#NULL!	0	#NULL!	0	#NULL!	0	#NULL!	0	#NULL!	0	#NULL!	0	0	0	0	0	0	-0.950913	2	1	3
46	s0046	2	35	2	2	1	1	2	#NULL!	1	2500	1	1	0	1	0	0	0	0	0	0	1	0	1	1	0	1	1	1	1	1	0	#NULL!	1	4	1	2	1	1	0	0	0	1	0	0	0.030646	3	1	4
46	t1046	1	20	2	2	2	1	2	#NULL!	1	99999	1	1	0	0	1	0	1	1	0	1	1	0	1	0	1	1	0	#NULL!	0	#NULL!	0	#NULL!	0	#NULL!	0	#NULL!	0	#NULL!	0	0	0	0	0	0	-1.55884	2	1	3
47	s0047	2	24	2	2	2	1	2	#NULL!	1	3300	1	1	1	1	0	1	1	1	0	1	1	1	1	1	1	1	1	4	1	11	0	#NULL!	1	7	1	7	1	3	1	1	0	1	1	1	7.17858	4	2	#NULL!
47	w1065	1	35	2	2	2	1	2	#NULL!	2	8000	1	2	0	0	1	0	1	1	1	1	1	1	0	1	0	1	0	#NULL!	0	#NULL!	0	#NULL!	0	#NULL!	0	#NULL!	0	#NULL!	0	0	0	0	0	0	-1.02124	2	1	3
47	t1047	1	30	2	2	1	1	1	99999	3	99999	1	3	0	0	1	0	0	0	0	0	1	1	1	0	0	1	0	#NULL!	0	#NULL!	0	#NULL!	0	#NULL!	0	#NULL!	1	1	0	0	0	0	0	0	-2.5451	1	1	4
48	s0048	2	25	2	2	1	1	2	#NULL!	3	4500	1	3	0	0	0	0	0	1	0	1	1	1	1	0	1	1	1	2	1	1	0	#NULL!	1	2	0	#NULL!	1	1	0	0	0	0	0	0	-0.193992	3	2	#NULL!
48	w1066	1	25	2	2	1	1	1	1	2	7000	1	2	0	0	1	0	1	1	1	0	1	0	1	0	1	0	0	2	0	#NULL!	0	#NULL!	0	#NULL!	0	#NULL!	0	#NULL!	0	0	0	0	0	0	-1.74386	1	1	3
48	t1048	1	22	2	2	2	1	2	#NULL!	1	99999	1	1	0	0	1	0	1	0	0	0	1	0	1	0	0	1	0	#NULL!	0	#NULL!	0	#NULL!	0	#NULL!	0	#NULL!	0	#NULL!	0	0	0	0	0	0	-3.27948	1	1	3
49	s0049	2	35	2	2	1	1	2	#NULL!	3	3400	1	3	0	0	0	0	0	1	0	0	1	1	1	0	1	1	1	1	1	1	0	#NULL!	1	4	0	#NULL!	1	1	0	0	0	1	0	0	-0.986937	2	2	#NULL!
49	t1049	1	24	2	2	3	1	2	#NULL!	2	8000	1	2	1	1	1	0	1	1	1	1	1	0	1	0	1	1	0	#NULL!	0	#NULL!	0	#NULL!	0	#NULL!	0	#NULL!	0	#NULL!	0	0	0	0	0	0	0.776098	3	1	3
49	w1067	1	30	2	2	3	1	2	#NULL!	3	7000	1	3	0	0	1	1	1	1	1	1	1	1	1	1	0	1	0	#NULL!	0	#NULL!	0	#NULL!	0	#NULL!	0	#NULL!	0	#NULL!	0	0	0	0	0	0	1.26531	3	1	3
50	s0050	2	16	1	2	2	1	2	#NULL!	3	5000	1	3	1	1	1	0	1	1	1	1	0	1	1	1	1	1	1	2	1	2	0	#NULL!	1	3	1	10	1	2	0	0	0	0	1	1	2.49209	4	2	#NULL!
50	t1050	1	27	2	2	2	1	2	#NULL!	3	99999	1	3	1	1	1	0	1	0	0	0	1	0	1	0	1	0	0	#NULL!	0	#NULL!	0	#NULL!	0	#NULL!	0	#NULL!	0	#NULL!	0	0	0	0	0	0	-1.55246	2	1	3
50	w1068	1	32	2	2	2	1	2	#NULL!	3	7000	1	3	0	0	1	0	1	1	1	1	0	1	0	1	1	1	0	#NULL!	0	#NULL!	0	#NULL!	0	#NULL!	0	#NULL!	0	#NULL!	0	0	0	0	0	0	-2.39224	1	1	3
51	s0051	2	28	2	2	1	1	2	#NULL!	1	2580	1	1	1	1	0	1	1	1	0	1	0	0	1	0	0	1	1	4	1	3	0	#NULL!	0	#NULL!	0	#NULL!	1	1	1	1	0	0	0	0	3.08367	4	2	#NULL!
51	t1051	1	26	2	2	2	1	2	#NULL!	1	99999	1	1	1	1	1	0	1	1	1	0	1	1	1	0	1	1	0	#NULL!	0	#NULL!	1	1	0	#NULL!	0	#NULL!	0	#NULL!	0	0	0	0	0	0	2.30293	4	1	4
51	w1069	1	33	2	2	1	1	2	#NULL!	3	6000	1	3	0	0	1	0	1	1	1	0	1	1	0	1	0	0	0	#NULL!	0	#NULL!	0	#NULL!	0	#NULL!	0	#NULL!	0	#NULL!	0	0	0	0	0	0	-1.81419	1	1	3
52	s0052	2	20	2	2	3	1	2	#NULL!	1	99999	1	1	1	1	0	0	1	1	0	0	1	1	1	1	1	1	1	4	1	3	0	#NULL!	1	4	1	10	1	1	1	1	0	1	1	0	5.371	4	1	3
52	t1052	1	26	2	2	1	1	2	#NULL!	2	99999	1	2	1	1	1	1	1	1	0	0	1	0	1	0	1	1	0	#NULL!	0	#NULL!	0	#NULL!	0	#NULL!	1	2	0	#NULL!	0	0	0	0	0	0	0.94422	3	1	3
52	w1070	1	25	2	2	2	1	2	#NULL!	3	#NULL!	1	3	0	0	1	1	1	1	1	1	1	1	1	1	1	1	0	#NULL!	0	#NULL!	0	#NULL!	0	#NULL!	0	#NULL!	0	#NULL!	0	0	0	0	0	0	1.26531	3	1	3
53	s0053	2	25	2	2	2	1	2	#NULL!	1	3750	1	1	0	0	1	1	1	1	1	1	0	0	1	1	0	1	0	#NULL!	0	#NULL!	0	#NULL!	0	#NULL!	1	4	1	1	0	0	0	0	1	0	0.545744	3	1	3
53	t1053	1	28	2	2	2	1	2	#NULL!	1	99999	1	1	0	1	1	0	1	0	0	0	1	1	1	0	1	1	0	#NULL!	0	#NULL!	0	#NULL!	1	3	1	2	1	2	0	0	0	0	0	1	-0.209862	3	1	3
53	w1071	1	28	2	2	1	1	2	#NULL!	1	6000	1	1	0	0	0	0	1	1	1	1	1	1	1	1	0	1	0	#NULL!	0	#NULL!	0	#NULL!	0	#NULL!	0	#NULL!	0	#NULL!	0	0	0	0	0	0	0.039005	3	1	3
54	w1072	1	20	2	2	3	1	2	#NULL!	2	6000	1	2	1	1	1	0	1	1	0	1	0	1	0	1	0	1	0	#NULL!	0	#NULL!	0	#NULL!	0	#NULL!	0	#NULL!	0	#NULL!	0	0	0	0	0	0	-1.27316	2	2	#NULL!
54	s0054	1	18	1	2	3	1	2	#NULL!	3	4000	1	2	1	1	1	1	1	1	0	1	1	1	1	0	1	1	1	3	1	4	0	#NULL!	1	2	1	6	1	1	1	1	0	0	1	0	6.5531	4	2	#NULL!
54	t1054	1	20	2	2	4	3	1	4000	2	5000	3	2	1	1	1	0	1	1	1	1	1	0	1	0	1	1	0	#NULL!	0	#NULL!	0	#NULL!	0	#NULL!	0	#NULL!	0	#NULL!	0	0	0	0	0	0	0.776098	3	2	#NULL!
55	w1073	1	22	2	2	3	1	1	2	3	7000	1	3	0	0	1	0	1	1	1	1	1	0	1	0	1	0	0	#NULL!	0	#NULL!	0	#NULL!	0	#NULL!	0	#NULL!	0	#NULL!	0	0	0	0	0	0	-0.950913	2	1	3
55	t1055	1	25	2	2	3	1	2	#NULL!	2	99999	1	2	0	1	1	0	1	1	1	1	1	0	1	0	1	1	0	#NULL!	0	#NULL!	0	#NULL!	0	#NULL!	1	3	0	#NULL!	0	0	0	0	0	0	0.528492	3	1	4
55	s0055	2	20	2	2	2	1	2	#NULL!	1	3000	1	1	0	0	0	0	0	1	0	0	1	1	1	1	0	1	1	2	1	3	0	#NULL!	0	#NULL!	1	10	1	1	0	1	0	0	1	0	1.46537	3	1	3
56	w1074	1	23	2	2	2	1	1	2	3	4000	1	3	0	0	1	0	1	1	1	1	1	1	1	1	0	0	0	2	0	2	0	#NULL!	0	#NULL!	0	#NULL!	0	#NULL!	0	0	0	0	0	0	0.257525	3	1	3
56	s0056	2	25	2	2	1	1	2	#NULL!	1	99999	1	1	1	1	0	0	1	1	0	1	1	0	1	1	0	1	1	3	1	2	0	#NULL!	0	#NULL!	0	#NULL!	0	#NULL!	1	0	0	0	0	0	2.11643	4	1	3
56	t1056	1	22	2	2	2	1	2	#NULL!	3	99999	1	3	1	1	1	0	1	1	1	1	1	0	1	0	1	0	0	#NULL!	0	#NULL!	0	#NULL!	1	2	1	1	0	#NULL!	0	0	0	0	0	0	2.18629	4	1	3
57	w1148	1	21	2	2	4	1	2	#NULL!	3	6000	1	3	0	0	1	0	1	1	1	1	1	1	1	1	1	1	0	#NULL!	0	#NULL!	0	#NULL!	0	#NULL!	0	#NULL!	0	#NULL!	0	0	0	0	0	0	0.257525	3	2	#NULL!
57	s0057	2	25	2	2	1	1	2	#NULL!	1	99999	1	1	1	1	0	0	1	1	1	1	1	1	1	1	1	1	1	2	1	1	0	#NULL!	1	3	1	2	1	1	0	0	0	0	0	0	3.5393	4	1	4
57	t1057	1	25	2	2	4	3	1	3333	2	6000	3	2	1	1	1	0	1	1	1	1	1	0	1	0	1	1	0	#NULL!	0	#NULL!	0	#NULL!	0	#NULL!	0	#NULL!	0	#NULL!	0	0	0	0	0	0	0.776098	3	1	3
58	w1149	2	26	2	1	1	2	2	#NULL!	3	#NULL!	2	3	0	0	1	0	1	1	1	1	1	1	0	1	0	1	0	#NULL!	0	#NULL!	0	#NULL!	0	#NULL!	0	#NULL!	0	#NULL!	0	0	0	0	0	0	-1.02124	2	2	#NULL!
58	s0058	2	32	2	2	1	1	2	#NULL!	1	99999	1	1	1	1	0	0	1	1	0	1	1	1	1	1	1	1	1	4	1	1	0	#NULL!	1	5	1	4	1	2	1	0	0	1	1	1	4.36627	4	1	3
58	t1058	1	26	2	2	2	1	2	#NULL!	1	99999	1	1	0	0	0	0	1	0	0	0	1	0	1	0	0	0	0	#NULL!	0	#NULL!	0	#NULL!	0	#NULL!	0	#NULL!	0	#NULL!	0	0	0	0	0	0	-3.49799	1	1	4
59	w1150	1	25	2	2	4	3	2	#NULL!	2	5000	3	2	0	0	1	0	1	1	1	1	1	1	0	1	0	1	0	#NULL!	0	#NULL!	0	#NULL!	0	#NULL!	0	#NULL!	0	#NULL!	0	0	0	0	0	0	-1.02124	2	2	#NULL!
59	s0059	2	26	2	2	1	1	2	#NULL!	3	99999	1	3	1	1	0	0	1	1	0	1	1	1	1	1	1	1	1	4	1	2	0	#NULL!	1	8	1	6	1	3	1	0	0	1	1	1	4.36627	4	1	4
59	t1059	1	28	2	2	3	1	2	#NULL!	3	99999	1	3	1	1	1	0	1	1	1	1	1	0	1	0	1	1	0	#NULL!	1	2	0	#NULL!	1	4	0	#NULL!	0	#NULL!	0	0	0	1	0	0	1.62509	4	1	3
60	w1151	1	25	2	2	2	1	2	#NULL!	3	2000	1	3	0	0	1	0	1	1	1	1	1	0	1	0	0	0	1	4	1	20	0	#NULL!	0	#NULL!	0	#NULL!	0	#NULL!	1	1	0	0	0	0	2.18323	4	2	#NULL!
60	s0060	2	33	2	2	1	1	2	#NULL!	1	99999	1	1	1	1	0	0	1	1	0	1	1	0	1	1	1	1	1	3	1	2	0	#NULL!	0	#NULL!	1	6	1	1	1	0	0	0	1	0	3.13915	4	1	4
60	t1060	1	28	2	2	1	1	2	#NULL!	1	99999	1	1	0	0	1	0	1	0	0	0	1	0	1	0	1	1	0	#NULL!	0	#NULL!	0	#NULL!	0	#NULL!	0	#NULL!	0	#NULL!	0	0	0	0	0	0	-3.27948	1	1	4
61	w1152	1	21	2	2	4	3	2	#NULL!	2	5000	3	2	0	0	0	1	1	1	1	1	1	1	1	1	1	0	0	#NULL!	0	#NULL!	0	#NULL!	0	#NULL!	0	#NULL!	0	#NULL!	0	0	0	0	0	0	1.04679	3	2	#NULL!
61	s0061	2	24	2	2	1	1	2	#NULL!	1	99999	1	1	0	1	0	0	1	1	0	1	1	1	1	1	1	1	1	2	1	1	0	#NULL!	1	6	1	8	1	1	0	0	0	1	1	0	2.22099	4	1	4
61	t1061	1	24	2	2	2	1	2	#NULL!	1	99999	1	1	1	1	1	0	1	1	1	0	1	0	1	0	1	1	1	1	0	#NULL!	0	#NULL!	0	#NULL!	1	4	1	1	0	0	0	0	1	0	1.00587	3	1	4
62	t1062	1	22	2	2	2	1	2	#NULL!	3	99999	1	3	1	1	1	0	1	1	1	1	1	0	1	0	1	0	0	#NULL!	0	#NULL!	0	#NULL!	0	#NULL!	1	5	0	#NULL!	0	0	0	0	1	0	1.43573	3	2	#NULL!
62	s0062	2	32	2	2	1	1	2	#NULL!	1	99999	1	1	1	1	0	0	1	1	0	1	1	0	1	1	1	1	1	2	1	1	0	#NULL!	0	#NULL!	1	3	1	1	0	0	0	0	0	0	1.7111	4	1	4
62	w1063	1	29	2	1	3	1	2	#NULL!	3	4000	1	3	0	0	1	0	1	0	0	0	1	0	1	1	0	0	0	#NULL!	0	#NULL!	0	#NULL!	0	#NULL!	0	#NULL!	0	#NULL!	0	0	0	0	0	0	-2.44232	1	1	3
63	s0063	2	28	2	2	1	1	2	#NULL!	1	99999	1	1	1	1	0	0	1	1	0	1	1	0	1	1	1	1	1	3	1	2	0	#NULL!	1	2	1	3	1	1	1	0	0	0	0	0	3.88971	4	1	4
63	w1062	1	38	3	1	2	3	1	2	3	7000	3	3	0	0	1	0	1	1	1	1	1	0	1	1	0	1	0	#NULL!	0	#NULL!	0	#NULL!	0	#NULL!	0	#NULL!	0	#NULL!	0	0	0	0	0	0	-0.113758	3	1	3
63	t1063	1	25	2	2	1	1	2	#NULL!	3	99999	1	3	0	0	1	0	1	1	0	0	1	0	1	0	1	1	0	#NULL!	0	#NULL!	0	#NULL!	0	#NULL!	0	#NULL!	0	#NULL!	0	0	0	0	0	0	-2.35178	1	1	3
64	w1052	1	24	2	2	3	3	2	#NULL!	2	4000	3	2	0	0	1	1	1	1	1	1	1	0	1	0	1	0	0	#NULL!	0	#NULL!	0	#NULL!	0	#NULL!	0	#NULL!	0	#NULL!	0	0	0	0	0	0	0.056875	3	2	#NULL!
64	s0064	2	32	2	2	1	1	2	#NULL!	1	99999	1	1	0	1	0	0	1	1	0	1	1	1	1	1	1	1	1	3	1	2	0	#NULL!	1	3	1	3	1	2	1	0	0	0	0	1	3.45903	4	1	4
64	t1064	1	30	2	2	3	1	2	#NULL!	1	99999	1	1	1	1	1	0	1	1	1	0	1	0	1	0	1	1	0	#NULL!	0	#NULL!	0	#NULL!	0	#NULL!	1	3	0	#NULL!	0	0	0	0	0	0	0.544356	3	1	4
65	t1065	1	28	2	2	1	1	2	#NULL!	3	99999	1	3	0	0	1	0	1	0	0	0	1	0	1	0	1	0	0	#NULL!	0	#NULL!	0	#NULL!	0	#NULL!	0	#NULL!	0	#NULL!	0	0	0	0	0	0	-3.27948	1	1	4
65	w1050	1	22	2	2	4	3	2	#NULL!	2	7000	3	2	0	0	1	0	1	1	1	1	0	1	0	1	0	0	0	#NULL!	0	#NULL!	0	#NULL!	0	#NULL!	0	#NULL!	0	#NULL!	0	0	0	0	0	0	-2.39224	1	2	#NULL!
65	s0065	2	26	2	2	1	1	2	#NULL!	1	99999	1	1	0	1	0	0	1	1	0	1	1	0	1	1	0	1	1	2	1	1	0	#NULL!	1	3	1	2	0	#NULL!	0	0	0	0	0	0	1.3882	3	1	3
66	w1047	1	33	2	2	4	3	2	#NULL!	2	4000	3	2	0	0	1	1	1	1	1	1	1	1	0	1	0	1	0	#NULL!	0	#NULL!	0	#NULL!	0	#NULL!	0	#NULL!	0	#NULL!	0	0	0	0	0	0	-0.013454	3	2	#NULL!
66	s0066	2	35	2	2	1	1	2	#NULL!	1	99999	1	1	1	1	0	0	1	1	0	1	1	1	1	1	1	1	1	2	1	2	0	#NULL!	1	3	1	5	1	1	0	0	0	0	1	0	3.0298	4	1	3
66	t1066	1	26	2	2	3	1	2	#NULL!	3	99999	1	3	0	0	1	0	1	1	0	0	1	0	1	0	1	1	0	#NULL!	0	#NULL!	0	#NULL!	0	#NULL!	0	#NULL!	0	#NULL!	0	0	0	0	0	0	-2.35178	1	1	3
67	s0067	2	22	2	2	1	1	2	#NULL!	1	99999	1	1	1	1	0	0	1	1	0	1	1	1	1	1	1	1	1	3	1	1	0	#NULL!	1	4	1	4	1	2	1	0	0	1	1	1	4.36627	4	1	3
67	t1067	1	20	2	2	2	1	2	#NULL!	3	99999	1	3	0	0	1	0	1	0	0	0	1	0	1	0	1	0	0	#NULL!	0	#NULL!	0	#NULL!	0	#NULL!	0	#NULL!	0	#NULL!	0	0	0	0	0	0	-3.27948	1	1	3
67	w1031	1	21	2	2	2	2	2	#NULL!	3	1000	2	2	0	0	1	0	1	1	1	1	1	1	1	1	0	1	0	#NULL!	0	#NULL!	0	#NULL!	0	#NULL!	0	#NULL!	0	#NULL!	0	0	0	0	0	0	0.257525	3	1	3
68	w1030	1	21	2	1	1	3	2	#NULL!	2	5000	3	2	0	0	1	0	1	1	1	1	1	1	1	1	0	1	0	#NULL!	0	#NULL!	0	#NULL!	0	#NULL!	0	#NULL!	0	#NULL!	0	0	0	0	0	0	0.257525	3	2	#NULL!
68	t1068	1	26	2	2	3	1	2	#NULL!	3	99999	1	3	0	0	0	0	1	0	0	0	1	1	1	0	1	0	0	#NULL!	0	#NULL!	1	2	0	#NULL!	0	#NULL!	0	#NULL!	0	0	0	0	0	0	-1.17822	2	2	#NULL!
68	s0068	2	31	2	2	1	1	2	#NULL!	1	99999	1	1	1	1	0	1	1	0	1	1	1	1	1	1	1	1	1	2	0	#NULL!	0	#NULL!	1	3	1	4	1	2	0	0	0	0	1	1	3.72466	4	1	3
69	s0069	2	36	3	2	1	1	2	#NULL!	1	99999	1	1	1	1	0	0	1	1	0	1	1	1	1	0	1	1	1	3	1	3	0	#NULL!	0	#NULL!	1	3	1	1	1	1	0	0	0	0	4.37937	4	1	3
69	t1069	2	28	2	2	2	1	2	#NULL!	1	99999	1	1	0	0	0	0	0	0	0	0	1	0	1	0	0	1	0	#NULL!	0	#NULL!	0	#NULL!	0	#NULL!	0	#NULL!	0	#NULL!	0	0	0	0	0	0	-3.49799	1	1	3
69	w1027	2	32	2	2	2	1	2	#NULL!	2	3000	1	2	0	0	1	0	1	1	0	0	1	0	1	0	1	0	0	#NULL!	0	#NULL!	0	#NULL!	0	#NULL!	0	#NULL!	0	#NULL!	0	0	0	0	0	0	-2.35178	1	1	3
70	s0070	2	23	2	2	1	1	2	#NULL!	1	99999	1	1	1	1	0	0	1	1	0	1	1	1	1	0	1	1	1	3	1	2	0	#NULL!	0	#NULL!	1	3	1	1	1	0	0	0	0	0	2.57485	4	1	3
70	t1070	2	18	1	2	2	1	2	#NULL!	1	99999	1	1	0	0	0	0	1	0	0	0	1	0	1	0	1	1	1	1	1	1	0	#NULL!	0	#NULL!	1	1	0	#NULL!	0	0	0	0	0	0	-2.93679	1	1	3
70	w1024	1	25	2	2	2	3	2	#NULL!	3	3000	4	3	0	0	1	0	1	1	1	1	1	0	1	0	1	0	0	#NULL!	0	#NULL!	0	#NULL!	0	#NULL!	0	#NULL!	0	#NULL!	0	0	0	0	0	0	-0.950913	2	1	3
71	w1018	2	21	2	2	4	3	2	#NULL!	2	3000	3	2	0	0	1	0	1	1	1	1	1	0	1	0	1	0	0	#NULL!	0	#NULL!	0	#NULL!	0	#NULL!	0	#NULL!	0	#NULL!	0	0	0	0	0	0	-0.950913	2	2	#NULL!
71	s0071	2	27	2	2	1	1	2	#NULL!	1	99999	1	1	1	1	0	0	1	1	0	1	1	1	1	1	1	1	1	3	1	1	0	#NULL!	1	10	1	6	1	2	1	0	0	1	1	1	4.36627	4	1	3
71	t1071	2	35	2	2	1	1	2	#NULL!	1	99999	1	1	0	0	0	0	0	0	0	0	1	0	1	0	1	1	1	2	0	#NULL!	0	#NULL!	1	2	0	#NULL!	0	#NULL!	0	0	0	0	0	0	-2.649	1	1	3
72	w1016	1	20	2	1	3	1	2	#NULL!	3	2000	1	3	0	0	1	0	1	1	1	1	1	1	1	1	1	1	0	#NULL!	0	#NULL!	0	#NULL!	0	#NULL!	0	#NULL!	0	#NULL!	0	0	0	0	0	0	0.257525	3	2	#NULL!
72	s0072	2	38	3	2	1	1	2	#NULL!	1	99999	1	1	1	1	0	0	1	1	0	1	1	1	1	1	1	1	1	3	1	2	0	#NULL!	1	6	1	6	1	3	1	0	0	1	1	1	4.36627	4	1	3
72	t1072	2	30	2	2	1	1	2	#NULL!	1	99999	1	1	0	0	0	0	0	0	0	0	1	0	1	0	0	1	0	#NULL!	0	#NULL!	0	#NULL!	0	#NULL!	1	2	0	#NULL!	0	0	0	0	0	0	-2.93679	1	1	4
73	s0073	2	33	2	2	1	1	2	#NULL!	1	99999	1	1	1	1	0	0	1	1	0	1	1	1	1	1	1	1	1	2	1	3	0	#NULL!	1	5	1	5	1	2	0	1	0	1	1	1	4.84117	4	1	3
73	w1014	1	25	2	2	2	1	2	#NULL!	2	3000	1	2	0	1	1	1	1	1	1	0	1	0	1	0	1	0	0	#NULL!	0	#NULL!	0	#NULL!	0	#NULL!	0	#NULL!	0	#NULL!	0	0	0	0	0	0	0.182134	3	1	3
73	t1073	2	25	2	2	1	1	2	#NULL!	1	99999	1	1	0	0	0	0	1	1	0	0	1	0	1	0	1	1	0	#NULL!	0	#NULL!	0	#NULL!	1	2	1	2	1	1	0	0	0	0	0	0	-0.797017	2	1	4
74	t1074	2	20	2	2	2	1	2	#NULL!	1	99999	1	1	0	0	0	0	0	0	0	0	1	0	1	0	0	1	0	#NULL!	0	#NULL!	0	#NULL!	0	#NULL!	0	#NULL!	0	#NULL!	0	0	0	0	0	0	-3.49799	1	2	#NULL!
74	w1010	1	24	2	2	2	1	2	#NULL!	1	6000	1	1	0	0	1	0	1	1	1	1	1	1	1	0	1	0	0	#NULL!	0	#NULL!	0	#NULL!	0	#NULL!	0	#NULL!	0	#NULL!	0	0	0	0	0	0	-0.57963	2	2	#NULL!
74	s0074	2	21	2	2	1	1	2	#NULL!	1	99999	1	1	1	1	0	0	1	1	0	1	1	1	1	1	1	1	1	3	1	1	0	#NULL!	0	#NULL!	1	7	1	1	1	0	0	0	1	0	3.51043	4	1	3
75	s0075	2	24	2	2	1	1	2	#NULL!	1	99999	1	1	1	1	1	1	1	1	1	1	1	1	1	1	1	1	1	2	1	1	0	#NULL!	1	3	1	2	1	2	0	0	0	0	0	1	4.77245	4	1	3
75	t1075	2	20	2	2	2	1	2	#NULL!	1	99999	1	1	0	0	0	0	1	0	0	0	1	0	1	0	0	0	0	#NULL!	1	1	0	#NULL!	1	5	1	2	1	1	0	0	0	1	0	0	-1.72471	2	1	4
75	w1007	1	26	2	2	1	3	1	2	3	5000	3	2	0	0	1	0	1	1	0	1	0	1	0	1	0	0	0	#NULL!	0	#NULL!	0	#NULL!	0	#NULL!	0	#NULL!	0	#NULL!	0	0	0	0	0	0	-3.00017	1	1	3
76	s0076	2	32	2	2	1	1	2	#NULL!	1	99999	1	1	0	1	0	0	1	1	0	1	1	1	1	1	1	1	1	4	1	2	0	#NULL!	1	6	1	7	1	1	1	0	0	1	1	0	3.55062	4	1	3
76	w1006	1	30	2	2	1	2	2	#NULL!	1	3000	2	1	0	0	1	0	1	0	1	0	1	0	1	0	1	0	0	#NULL!	0	#NULL!	0	#NULL!	0	#NULL!	0	#NULL!	0	#NULL!	0	0	0	0	0	0	-2.67155	1	1	3
76	t1076	2	25	2	2	2	1	2	#NULL!	1	99999	1	1	0	0	0	0	1	0	0	0	1	0	1	0	1	1	1	1	0	#NULL!	0	#NULL!	0	#NULL!	0	#NULL!	0	#NULL!	0	0	0	0	0	0	-3.49799	1	1	3
77	s0077	2	24	2	2	1	1	2	#NULL!	1	99999	1	1	1	1	0	0	1	1	0	1	1	0	1	1	0	1	1	3	1	1	0	#NULL!	1	3	1	5	1	1	1	0	0	0	1	0	3.98814	4	1	3
77	t1077	2	29	2	2	1	1	2	#NULL!	1	99999	1	1	0	0	0	0	0	0	0	0	1	0	1	0	0	1	0	#NULL!	0	#NULL!	0	#NULL!	0	#NULL!	0	#NULL!	0	#NULL!	0	0	0	0	0	0	-3.49799	1	1	3
77	w1003	1	24	2	2	2	1	2	#NULL!	3	4000	1	3	0	0	1	0	1	1	1	1	1	0	1	0	1	0	0	#NULL!	0	#NULL!	0	#NULL!	0	#NULL!	0	#NULL!	0	#NULL!	0	0	0	0	0	0	-0.950913	2	1	3
78	s0078	2	39	3	2	1	1	2	#NULL!	1	99999	1	1	0	1	0	1	1	1	1	1	1	1	1	1	1	1	1	2	1	1	0	#NULL!	0	#NULL!	1	3	1	2	0	0	0	0	0	1	2.89613	4	1	3
78	t1078	2	29	2	2	1	1	2	#NULL!	1	99999	1	1	0	0	0	0	1	0	0	0	1	0	1	0	1	1	0	#NULL!	0	#NULL!	0	#NULL!	0	#NULL!	1	1	1	1	0	0	0	0	0	0	-2.5737	1	1	3
78	w1077	1	20	2	2	2	1	2	#NULL!	3	6000	1	3	0	0	1	0	1	1	1	1	1	0	1	0	1	0	0	#NULL!	0	#NULL!	0	#NULL!	0	#NULL!	0	#NULL!	0	#NULL!	0	0	0	0	0	0	-0.950913	2	1	3
79	s0079	2	25	2	2	4	1	2	#NULL!	1	99999	1	1	1	1	0	0	1	1	0	1	1	0	1	1	1	1	1	2	1	1	0	#NULL!	1	3	1	2	1	1	0	0	0	0	0	0	2.56009	4	1	4
79	w1078	1	27	2	2	2	1	2	#NULL!	3	7000	1	3	0	0	1	0	1	1	1	1	1	1	0	1	0	1	0	#NULL!	0	2	0	#NULL!	0	#NULL!	0	#NULL!	0	#NULL!	0	0	0	0	0	0	-1.02124	2	1	3
79	t1079	2	25	2	2	1	1	2	#NULL!	1	99999	1	1	0	0	0	0	1	0	0	0	1	0	1	0	1	1	0	#NULL!	0	#NULL!	0	#NULL!	1	2	0	#NULL!	0	#NULL!	0	0	0	0	0	0	-2.649	1	1	4
80	s0080	2	36	3	2	1	1	2	#NULL!	1	99999	1	1	0	1	0	1	1	1	1	1	1	1	0	1	1	1	1	2	1	1	0	#NULL!	1	2	0	#NULL!	1	1	0	0	0	0	0	0	1.89831	4	1	3
80	w1079	1	20	2	2	2	1	2	#NULL!	2	3000	1	2	0	0	1	0	1	1	1	0	1	0	1	0	1	1	0	#NULL!	0	#NULL!	0	#NULL!	0	#NULL!	0	#NULL!	0	#NULL!	0	0	0	0	0	0	-1.74386	1	1	4
80	t1080	2	23	2	2	3	1	2	#NULL!	2	3000	1	2	0	0	0	0	1	1	1	0	1	0	1	0	1	1	1	2	0	#NULL!	0	#NULL!	1	2	0	#NULL!	0	#NULL!	0	0	0	0	0	0	-1.11338	2	1	4
81	t1081	1	23	2	2	2	1	2	#NULL!	1	99999	1	1	0	0	0	0	1	0	0	0	1	0	1	0	1	1	1	2	0	#NULL!	0	#NULL!	1	1	0	#NULL!	1	1	0	0	0	0	0	0	-2.28591	1	2	#NULL!
81	s0081	2	29	2	2	1	1	2	#NULL!	1	99999	1	1	0	1	0	0	1	0	0	1	1	1	1	1	1	1	1	3	1	1	0	#NULL!	1	9	0	#NULL!	1	1	1	0	0	1	0	0	1.96329	4	1	3
81	w1080	1	30	2	2	1	1	2	#NULL!	3	7000	1	3	0	0	1	0	1	1	1	1	1	0	1	1	1	1	0	#NULL!	0	#NULL!	0	#NULL!	0	#NULL!	0	#NULL!	0	#NULL!	0	0	0	0	0	0	-0.113758	3	1	3
82	s0082	2	26	2	2	1	1	2	#NULL!	1	99999	1	1	1	1	1	0	1	1	1	1	1	1	1	1	1	1	1	2	1	2	0	#NULL!	1	3	1	3	1	2	0	0	0	0	0	1	3.76466	4	1	3
82	t1082	2	23	2	2	2	1	2	#NULL!	1	99999	1	1	0	0	0	0	1	0	0	0	1	0	1	0	0	1	1	2	0	#NULL!	0	#NULL!	0	#NULL!	1	7	0	#NULL!	0	0	0	0	1	0	-2.83837	1	1	1
82	w1081	1	30	2	2	2	1	2	#NULL!	3	15000	1	3	1	0	0	1	1	1	1	1	0	1	1	1	1	0	0	#NULL!	0	#NULL!	0	#NULL!	0	#NULL!	0	#NULL!	0	#NULL!	0	0	0	0	0	0	0.484599	3	1	4
83	s0083	2	29	2	2	1	1	2	#NULL!	1	99999	1	1	1	1	0	0	1	0	1	1	0	0	1	0	1	1	1	3	1	2	0	#NULL!	1	3	1	5	1	2	1	0	0	0	1	1	1.46706	3	1	3
83	t1083	2	27	2	2	2	1	2	#NULL!	1	99999	1	1	0	0	0	0	1	0	0	0	1	0	1	0	1	1	1	2	1	1	0	#NULL!	1	1	0	#NULL!	1	1	0	0	0	0	0	0	-2.28591	1	1	4
83	w1082	1	22	2	2	2	1	2	#NULL!	2	5000	1	2	0	0	1	0	1	1	1	1	1	0	1	0	1	0	0	#NULL!	0	#NULL!	0	#NULL!	0	#NULL!	0	#NULL!	0	#NULL!	0	0	0	0	0	0	-0.950913	2	1	3
84	t1084	2	30	2	2	1	1	2	#NULL!	1	99999	1	1	0	0	0	0	1	1	0	0	1	0	1	0	0	0	0	#NULL!	1	1	0	#NULL!	0	#NULL!	0	#NULL!	0	#NULL!	0	0	0	0	0	0	-2.5703	1	2	#NULL!
84	w1083	1	25	2	1	2	1	1	2	3	6000	1	3	0	0	1	1	1	1	1	0	1	0	1	1	1	1	0	#NULL!	0	#NULL!	0	#NULL!	0	#NULL!	0	#NULL!	0	#NULL!	0	0	0	0	0	0	0.101086	3	1	3
84	s0084	2	38	3	2	1	1	2	#NULL!	1	99999	1	1	1	1	0	0	1	1	0	1	1	1	1	0	1	1	1	3	1	1	0	#NULL!	1	5	1	6	1	2	1	0	0	1	1	1	3.52911	4	1	4
85	s0085	2	34	2	2	1	1	2	#NULL!	1	99999	1	1	0	1	0	0	1	1	0	1	1	0	1	1	1	1	1	5	1	3	0	#NULL!	1	4	1	2	1	1	1	1	0	1	0	0	4.88543	4	1	3
85	t1085	2	20	2	2	2	1	2	#NULL!	1	99999	1	1	1	1	0	1	0	1	1	0	1	0	1	0	0	0	0	#NULL!	0	#NULL!	0	#NULL!	1	1	1	2	0	#NULL!	0	0	0	0	0	0	2.18262	4	1	3
85	w1084	1	22	2	2	2	1	2	#NULL!	2	4000	1	2	1	1	1	1	1	1	1	1	1	1	1	1	1	1	0	#NULL!	0	#NULL!	0	#NULL!	0	#NULL!	0	#NULL!	0	#NULL!	0	0	0	0	0	0	2.99232	4	1	4
86	s0086	2	37	3	2	1	1	2	#NULL!	1	99999	1	1	1	1	1	0	1	1	0	1	1	1	1	0	1	1	1	3	1	2	0	#NULL!	1	8	1	4	1	2	1	0	0	1	1	1	3.74763	4	1	4
86	t1086	2	35	2	2	2	1	2	#NULL!	1	99999	1	1	0	1	0	0	1	0	0	0	1	0	1	0	1	1	1	2	1	2	0	#NULL!	1	4	0	#NULL!	1	2	0	0	0	1	0	1	-1.36087	2	1	3
86	w1085	1	31	2	2	2	1	2	#NULL!	2	5000	1	2	0	0	1	0	1	1	1	1	1	1	1	1	1	1	0	#NULL!	0	#NULL!	0	#NULL!	0	#NULL!	0	#NULL!	0	#NULL!	0	0	0	0	0	0	0.257525	3	1	3
87	s0087	2	29	2	2	1	1	2	#NULL!	1	99999	1	1	1	1	0	1	1	1	0	1	1	1	1	1	1	1	1	2	1	1	0	#NULL!	1	1	1	3	1	1	0	0	0	0	0	0	3.93916	4	1	3
87	w1086	1	29	2	2	2	1	2	#NULL!	1	#NULL!	1	1	0	0	1	0	1	1	1	1	1	0	1	0	1	0	0	#NULL!	0	#NULL!	0	#NULL!	0	#NULL!	0	#NULL!	0	#NULL!	0	0	0	0	0	0	-0.950913	2	1	3
87	t1087	2	23	2	2	2	1	2	#NULL!	3	99999	1	3	1	1	0	0	1	1	0	1	1	0	1	0	1	1	1	2	1	1	0	#NULL!	1	8	1	12	1	1	0	0	0	1	1	0	1.82136	4	1	3
88	w2523	2	27	2	1	1	1	2	#NULL!	1	3000	1	1	0	0	1	0	1	1	1	1	1	1	0	1	0	0	0	#NULL!	0	#NULL!	0	#NULL!	0	#NULL!	0	#NULL!	0	#NULL!	0	0	0	0	0	0	-1.02124	2	2	#NULL!
88	s0088	2	24	2	2	1	1	2	#NULL!	1	99999	1	1	0	1	0	0	1	1	0	1	1	0	1	1	1	1	1	2	1	1	0	#NULL!	0	#NULL!	1	4	1	1	0	0	0	0	1	0	1.00072	3	1	4
88	t1088	2	46	3	2	1	1	2	#NULL!	1	99999	1	1	0	0	0	0	1	0	0	0	1	0	1	0	0	1	0	#NULL!	0	#NULL!	0	#NULL!	0	#NULL!	0	#NULL!	1	1	0	0	0	0	0	0	-3.13491	1	1	4
89	s0089	2	28	2	2	1	1	2	#NULL!	1	99999	1	1	1	1	0	0	1	1	0	1	1	0	1	1	1	1	1	3	1	2	0	#NULL!	1	4	1	6	1	2	1	0	0	1	1	1	3.99498	4	1	4
89	t1089	2	21	2	2	2	1	2	#NULL!	3	99999	1	3	0	0	0	0	1	1	0	0	1	0	1	0	1	1	1	1	0	#NULL!	0	#NULL!	1	1	1	7	0	#NULL!	0	0	0	0	1	0	-1.06168	2	1	3
89	w1088	1	22	2	2	4	1	2	#NULL!	2	4000	1	2	0	0	0	1	0	1	0	0	0	0	0	0	0	0	0	#NULL!	0	#NULL!	0	#NULL!	0	#NULL!	0	#NULL!	0	#NULL!	0	0	0	0	0	0	-4.21228	1	1	3
90	s0090	2	35	2	2	1	1	2	#NULL!	1	99999	1	1	1	1	0	1	1	1	0	0	1	0	1	1	0	1	0	#NULL!	0	#NULL!	0	#NULL!	1	1	1	1	0	#NULL!	0	0	0	0	0	0	2.41185	4	1	3
90	t1090	2	35	2	2	2	1	2	#NULL!	1	99999	1	1	0	0	0	0	1	0	0	0	1	0	1	0	0	1	1	2	0	#NULL!	0	#NULL!	0	#NULL!	1	3	1	1	0	0	0	0	0	0	-2.5737	1	1	3
90	w1089	1	26	2	2	2	1	2	#NULL!	3	3000	1	3	0	0	1	0	1	1	1	1	1	1	1	1	0	0	0	#NULL!	0	#NULL!	0	#NULL!	0	#NULL!	0	#NULL!	0	#NULL!	0	0	0	0	0	0	0.257525	3	1	3
91	s0091	2	27	2	2	1	1	2	#NULL!	1	99999	1	1	0	1	0	1	1	0	1	0	1	0	1	1	0	1	1	1	1	1	0	#NULL!	1	3	1	2	1	1	0	0	0	0	0	0	1.64636	4	1	3
91	t1091	2	27	2	2	2	1	2	#NULL!	3	99999	1	3	1	1	1	0	1	1	1	1	1	0	1	0	1	1	0	#NULL!	0	#NULL!	0	#NULL!	0	#NULL!	0	#NULL!	0	#NULL!	0	0	0	0	0	0	0.776098	3	1	3
91	w1090	1	21	2	2	2	1	2	#NULL!	3	6000	1	3	0	0	1	0	1	1	1	1	1	1	0	1	1	0	0	#NULL!	0	#NULL!	0	#NULL!	0	#NULL!	0	#NULL!	0	#NULL!	0	0	0	0	0	0	-1.02124	2	1	3
92	s0092	2	29	2	2	2	1	2	#NULL!	1	99999	1	1	0	1	0	0	1	1	0	0	1	1	1	0	1	1	1	5	1	3	0	#NULL!	1	3	0	#NULL!	1	1	1	1	0	0	0	0	3.06541	4	1	3
92	t1092	2	25	2	2	1	1	2	#NULL!	1	99999	1	1	0	0	0	0	1	0	0	0	1	0	1	1	1	1	0	#NULL!	0	#NULL!	0	#NULL!	0	#NULL!	0	#NULL!	0	#NULL!	0	0	0	0	0	0	-2.66084	1	1	3
92	w1091	1	20	2	2	2	1	2	#NULL!	2	4000	1	2	0	0	1	1	1	0	1	1	1	1	0	1	0	0	0	#NULL!	0	#NULL!	0	#NULL!	0	#NULL!	0	#NULL!	0	#NULL!	0	0	0	0	0	0	-0.941148	2	1	3
93	s0093	2	25	2	2	2	1	2	#NULL!	1	99999	1	1	0	1	0	0	1	1	1	0	1	0	1	1	0	1	1	5	1	3	0	#NULL!	1	4	1	1	1	1	1	1	0	1	0	0	4.70041	4	2	#NULL!
93	w1092	1	30	2	2	1	1	2	#NULL!	3	5000	1	3	0	0	1	0	1	1	1	1	1	0	1	1	1	0	0	#NULL!	0	#NULL!	0	#NULL!	0	#NULL!	0	#NULL!	0	#NULL!	0	0	0	0	0	0	-0.113758	3	1	3
93	t1093	2	25	2	2	2	1	2	#NULL!	1	99999	1	1	0	0	0	0	0	0	0	0	1	0	1	0	0	1	1	1	1	1	0	#NULL!	1	4	1	6	1	2	0	0	0	1	1	1	-1.61944	2	1	4
94	w1093	1	21	2	2	2	1	1	2	3	5000	1	3	0	0	1	0	1	1	1	1	1	0	1	1	0	1	0	#NULL!	0	#NULL!	0	#NULL!	0	#NULL!	0	#NULL!	0	#NULL!	0	0	0	0	0	0	-0.113758	3	1	4
94	t1094	2	35	2	2	1	1	2	#NULL!	1	99999	1	1	0	0	0	0	0	0	0	0	1	0	1	0	0	1	1	1	1	1	0	#NULL!	1	2	1	2	1	1	0	0	0	0	0	0	-1.72471	2	1	4
94	s0094	2	30	2	2	1	1	2	#NULL!	1	99999	1	1	0	0	0	1	1	0	0	0	0	0	1	0	0	1	0	#NULL!	0	#NULL!	0	#NULL!	1	5	1	3	1	1	0	0	0	1	0	0	-2.08793	1	1	3
95	w1094	1	29	2	2	1	1	2	#NULL!	3	3000	1	3	0	0	1	0	1	1	1	1	1	0	1	0	0	0	0	#NULL!	0	#NULL!	0	#NULL!	0	#NULL!	0	#NULL!	0	#NULL!	0	0	0	0	0	0	-0.950913	2	1	3
95	s0095	2	31	2	1	1	1	2	#NULL!	3	5800	1	3	1	1	0	1	1	1	0	1	0	0	1	0	1	1	0	#NULL!	0	#NULL!	0	#NULL!	0	#NULL!	0	#NULL!	0	#NULL!	0	0	0	0	0	0	-0.41356	2	1	4
95	t1095	2	25	2	2	3	1	2	#NULL!	1	99999	1	1	0	1	0	0	0	0	0	0	1	0	1	0	0	1	0	#NULL!	0	#NULL!	0	#NULL!	1	2	1	1	1	1	0	0	0	0	0	0	-0.806509	2	1	4
96	w1095	1	25	2	2	1	1	2	#NULL!	1	4000	1	1	0	0	1	0	1	1	1	0	1	0	1	0	1	0	0	#NULL!	0	#NULL!	0	#NULL!	0	#NULL!	0	#NULL!	0	#NULL!	0	0	0	0	0	0	-1.74386	1	1	4
96	s0096	2	16	1	2	2	1	2	#NULL!	3	99999	1	3	0	0	0	0	0	1	0	0	1	0	1	0	1	1	0	#NULL!	0	#NULL!	0	#NULL!	0	#NULL!	0	#NULL!	0	#NULL!	0	0	0	0	0	0	-2.5703	1	2	#NULL!
97	w1096	1	19	1	2	2	1	2	#NULL!	2	5000	1	2	0	0	1	0	1	1	1	1	1	1	0	1	0	0	0	#NULL!	0	#NULL!	0	#NULL!	0	#NULL!	0	#NULL!	0	#NULL!	0	0	0	0	0	0	-1.02124	2	2	#NULL!
97	s0097	2	22	2	2	2	1	2	#NULL!	1	99999	1	1	1	1	0	1	1	1	0	1	1	0	1	1	0	1	1	5	1	3	0	#NULL!	1	6	1	10	0	#NULL!	1	1	0	1	1	0	6.43736	4	2	#NULL!
97	t1097	2	25	2	2	2	1	2	#NULL!	1	99999	1	1	0	1	0	0	1	1	1	0	1	1	1	0	0	1	1	2	1	1	1	1	1	4	1	8	1	2	0	0	0	1	1	1	3.15416	4	1	3
98	w1097	1	26	2	2	1	1	2	#NULL!	1	3000	1	1	0	0	1	1	1	1	1	1	1	1	1	1	0	1	0	#NULL!	0	#NULL!	0	#NULL!	0	#NULL!	0	#NULL!	0	#NULL!	0	0	0	0	0	0	1.26531	3	1	3
98	t1098	2	25	2	2	1	1	2	#NULL!	1	99999	1	1	0	0	0	0	1	0	0	0	1	0	1	0	1	1	1	1	1	1	0	#NULL!	1	2	1	6	1	1	0	0	0	0	1	0	-1.62628	2	1	3
98	s0098	2	32	2	2	1	1	2	#NULL!	1	99999	1	1	1	1	0	1	1	0	0	0	1	1	1	0	0	1	1	5	1	2	0	#NULL!	1	6	1	4	1	2	1	0	0	1	1	1	2.81626	4	1	3
99	s0099	2	24	2	2	1	1	2	#NULL!	1	99999	1	1	0	0	0	1	1	0	0	0	1	0	1	1	0	1	1	2	0	#NULL!	0	#NULL!	0	#NULL!	1	5	0	#NULL!	0	0	0	0	1	0	-0.993424	2	1	3
99	t1099	2	28	2	2	2	1	2	#NULL!	3	99999	1	3	0	0	0	0	1	0	0	0	1	1	1	0	1	1	0	#NULL!	0	#NULL!	0	#NULL!	0	#NULL!	0	#NULL!	0	#NULL!	0	0	0	0	0	0	-3.12671	1	1	3
99	w1098	1	26	2	2	1	1	2	#NULL!	3	5000	1	3	0	0	1	0	1	1	1	1	1	1	1	0	1	0	0	#NULL!	0	#NULL!	0	#NULL!	0	#NULL!	0	#NULL!	0	#NULL!	0	0	0	0	0	0	-0.57963	2	1	3
100	s0100	2	25	2	2	1	1	2	#NULL!	1	99999	1	1	0	1	0	0	0	0	1	0	1	1	0	1	1	0	1	1	1	2	1	3	0	#NULL!	0	#NULL!	1	1	0	0	1	0	0	0	4.3243	4	2	#NULL!
100	w1099	1	28	2	2	3	1	2	#NULL!	3	4000	1	3	1	1	1	0	1	1	1	1	1	0	1	0	1	0	0	#NULL!	0	#NULL!	0	#NULL!	0	#NULL!	0	#NULL!	0	#NULL!	0	0	0	0	0	0	0.776098	3	1	3
100	t1100	2	20	2	2	2	1	2	#NULL!	3	99999	1	3	0	0	0	0	0	0	0	0	1	0	1	0	0	1	1	2	0	#NULL!	0	#NULL!	0	#NULL!	1	2	1	1	0	0	0	0	0	0	-2.5737	1	1	4
101	s0101	2	30	2	2	1	1	2	#NULL!	1	99999	1	1	1	1	0	1	1	0	1	0	1	0	1	1	1	1	1	5	1	2	0	#NULL!	1	4	0	#NULL!	0	#NULL!	1	0	0	1	0	0	2.8605	4	2	#NULL!
101	w1101	1	28	2	2	2	1	2	#NULL!	3	5000	1	2	0	0	1	0	1	1	1	1	1	0	1	1	0	1	0	#NULL!	0	#NULL!	0	#NULL!	0	#NULL!	0	#NULL!	0	#NULL!	0	0	0	0	0	0	-0.113758	3	1	3
101	t1101	2	20	2	2	2	1	2	#NULL!	1	99999	1	1	0	0	0	0	1	1	0	0	1	0	1	0	0	1	0	#NULL!	0	#NULL!	0	#NULL!	1	4	1	4	1	1	0	0	0	1	1	0	-0.698591	2	1	4
102	s0102	2	25	2	1	1	1	2	#NULL!	2	5000	1	2	1	1	0	0	1	1	0	1	1	0	1	1	1	0	0	#NULL!	0	#NULL!	0	#NULL!	0	#NULL!	0	#NULL!	0	#NULL!	0	0	0	0	0	0	0.786809	3	1	3
102	t1102	2	25	2	2	1	1	2	#NULL!	1	99999	1	1	0	0	0	0	1	0	0	0	1	0	1	0	1	1	1	1	1	1	0	#NULL!	0	#NULL!	0	#NULL!	1	1	0	0	0	0	0	0	-3.13491	1	1	3
102	w1102	1	36	3	2	1	1	2	#NULL!	3	4000	1	3	0	0	1	0	1	1	1	1	0	1	0	1	0	0	0	#NULL!	0	#NULL!	0	#NULL!	0	#NULL!	0	#NULL!	0	#NULL!	0	0	0	0	0	0	-2.39224	1	1	4
103	w1103	1	28	2	2	2	1	2	#NULL!	3	4000	1	3	0	0	1	0	1	1	0	1	1	1	1	0	1	0	0	#NULL!	0	#NULL!	0	#NULL!	0	#NULL!	0	#NULL!	0	#NULL!	0	0	0	0	0	0	-1.18755	2	2	#NULL!
103	s0103	2	29	2	2	1	1	2	#NULL!	1	99999	1	1	1	1	0	1	1	0	0	0	1	0	1	1	0	1	1	5	1	3	0	#NULL!	1	6	1	5	1	2	1	1	0	1	1	1	5.08665	4	1	3
103	t1103	2	28	2	2	2	1	2	#NULL!	1	99999	1	1	0	1	0	0	1	0	0	0	1	0	1	0	0	1	1	2	1	1	0	#NULL!	1	3	0	#NULL!	1	1	0	0	0	0	0	0	-1.36771	2	1	4
104	s0104	2	20	2	2	2	1	2	#NULL!	1	99999	1	1	1	1	0	1	1	1	1	0	1	0	1	1	0	1	0	#NULL!	1	2	0	#NULL!	1	5	1	3	0	#NULL!	0	0	0	1	0	0	3.01977	4	2	#NULL!
104	t1104	2	22	2	2	1	1	2	#NULL!	1	99999	1	1	0	0	0	0	1	0	0	0	1	0	1	0	0	1	0	#NULL!	0	#NULL!	0	#NULL!	0	#NULL!	0	#NULL!	0	#NULL!	0	0	0	0	0	0	-3.49799	1	1	3
104	w1104	1	25	2	2	2	1	2	#NULL!	3	3000	1	3	0	0	1	0	1	1	1	1	1	1	0	1	0	0	0	#NULL!	0	#NULL!	0	#NULL!	0	#NULL!	0	#NULL!	0	#NULL!	0	0	0	0	0	0	-1.02124	2	1	3
105	s0105	2	35	2	2	1	2	2	#NULL!	1	99999	2	1	0	0	0	0	0	1	1	1	1	0	1	0	1	1	1	6	1	4	0	#NULL!	1	4	1	5	1	2	1	1	0	1	1	1	3.84326	4	1	4
105	t1105	2	26	2	2	2	1	2	#NULL!	3	99999	1	3	0	0	0	0	0	0	0	0	1	0	1	0	0	1	0	#NULL!	0	#NULL!	0	#NULL!	1	1	1	3	1	1	0	0	0	0	0	0	-1.72471	2	1	4
105	w1105	1	24	2	2	2	1	2	#NULL!	1	4000	1	1	0	0	1	0	1	1	1	1	1	0	1	1	0	0	0	#NULL!	0	#NULL!	0	#NULL!	0	#NULL!	0	#NULL!	0	#NULL!	0	0	0	0	0	0	-0.113758	3	1	3
106	w1106	1	20	2	2	2	1	2	#NULL!	3	5000	1	2	0	0	1	0	1	1	1	1	1	1	0	1	0	1	0	#NULL!	0	#NULL!	0	#NULL!	0	#NULL!	0	#NULL!	0	#NULL!	0	0	0	0	0	0	-1.02124	2	2	#NULL!
106	s0106	2	30	2	2	1	1	2	#NULL!	3	99999	1	2	0	0	0	1	1	1	0	1	1	0	1	1	1	1	0	#NULL!	1	1	0	#NULL!	0	#NULL!	1	3	0	#NULL!	0	0	0	0	0	0	0.628789	3	2	#NULL!
106	t1106	2	20	2	2	2	1	2	#NULL!	1	99999	1	1	0	0	0	0	1	0	0	0	1	0	1	0	1	1	1	2	1	2	0	#NULL!	1	5	1	10	1	2	0	0	0	1	1	1	-1.61944	2	1	4
107	s0107	2	35	2	2	1	1	2	#NULL!	1	99999	1	1	0	1	0	0	1	1	0	0	1	0	1	1	0	1	1	6	1	3	0	#NULL!	0	#NULL!	1	8	1	2	1	1	0	0	1	1	3.34876	4	2	#NULL!
107	w1107	1	28	2	2	2	1	2	#NULL!	3	4000	1	3	0	0	1	0	1	1	1	0	1	1	1	1	0	1	0	#NULL!	0	#NULL!	0	#NULL!	0	#NULL!	0	#NULL!	0	#NULL!	0	0	0	0	0	0	-0.535419	2	1	3
107	t1107	2	26	2	2	2	1	1	99999	1	99999	1	1	0	0	0	0	0	0	0	0	1	0	1	0	1	1	0	#NULL!	0	#NULL!	0	#NULL!	0	#NULL!	1	6	1	1	0	0	0	0	1	0	-2.47528	1	1	4
108	s0108	2	25	2	1	2	1	2	#NULL!	1	3500	1	1	0	0	0	0	0	0	0	1	1	0	1	1	1	1	0	#NULL!	0	#NULL!	0	#NULL!	0	#NULL!	0	#NULL!	0	#NULL!	0	0	0	0	0	0	-1.8679	1	1	4
108	t1108	1	30	2	2	2	1	2	#NULL!	1	99999	1	1	0	0	0	0	1	0	0	0	1	0	1	0	1	1	1	1	1	1	0	#NULL!	1	1	1	4	1	1	0	0	0	0	1	0	-1.62628	2	1	3
108	w1108	1	19	1	2	4	1	2	#NULL!	2	4000	1	2	0	0	1	0	1	1	1	0	1	1	1	1	0	0	0	#NULL!	0	#NULL!	0	#NULL!	0	#NULL!	0	#NULL!	0	#NULL!	0	0	0	0	0	0	-0.535419	2	1	3
109	s0109	2	20	2	2	2	1	2	#NULL!	1	2000	1	1	0	0	0	0	0	1	0	1	1	0	1	1	0	1	1	4	0	#NULL!	1	8	1	3	1	2	1	1	1	0	1	0	0	0	8.16611	4	2	#NULL!
109	w1110	1	33	2	2	2	1	2	#NULL!	2	4000	1	2	0	0	1	0	1	1	1	0	1	0	1	0	0	0	0	#NULL!	0	#NULL!	0	#NULL!	0	#NULL!	0	#NULL!	0	#NULL!	0	0	0	0	0	0	-1.74386	1	1	3
110	t1110	2	24	2	2	2	1	2	#NULL!	1	99999	1	1	0	1	0	0	1	0	0	0	1	0	1	0	1	1	1	1	0	#NULL!	0	#NULL!	0	#NULL!	1	4	1	1	0	0	0	0	1	0	-1.55708	2	2	#NULL!
110	s0110	1	25	2	2	1	1	2	#NULL!	3	99999	1	2	1	1	1	0	1	1	0	0	0	0	1	0	0	1	1	2	0	#NULL!	0	#NULL!	0	#NULL!	0	#NULL!	1	1	0	0	0	0	0	0	-1.63268	2	1	3
110	w1111	1	32	2	2	2	1	2	#NULL!	3	5000	1	3	0	0	1	0	1	1	1	1	1	0	1	1	0	0	0	#NULL!	0	#NULL!	0	#NULL!	0	#NULL!	0	#NULL!	0	#NULL!	0	0	0	0	0	0	-0.113758	3	1	3
111	s0111	1	29	2	2	2	3	2	#NULL!	1	99999	4	1	1	1	1	0	0	0	0	0	0	0	1	0	1	0	0	#NULL!	0	#NULL!	0	#NULL!	0	#NULL!	0	#NULL!	0	#NULL!	0	0	0	0	0	0	-2.92347	1	1	3
111	t1111	2	27	2	2	1	1	2	#NULL!	1	99999	1	1	0	1	0	0	1	0	0	0	1	0	1	0	1	1	1	1	1	1	0	#NULL!	0	#NULL!	1	2	1	1	0	0	0	0	0	0	-1.6555	2	1	4
111	w1112	1	18	1	2	2	1	2	#NULL!	3	4000	1	3	0	0	1	0	0	0	0	0	0	0	0	1	1	0	0	#NULL!	0	#NULL!	0	#NULL!	0	#NULL!	0	#NULL!	0	#NULL!	0	0	0	0	0	0	-5.09209	1	1	3
112	s0112	1	25	2	2	2	1	2	#NULL!	1	99999	1	1	0	1	1	0	0	1	0	0	1	0	1	0	0	1	0	#NULL!	0	#NULL!	0	#NULL!	0	#NULL!	0	#NULL!	0	#NULL!	0	0	0	0	0	0	-1.43358	2	2	#NULL!
112	w1113	1	20	2	2	3	1	2	#NULL!	2	4000	1	2	0	0	1	0	1	1	1	1	1	1	0	1	0	0	0	#NULL!	0	#NULL!	0	#NULL!	0	#NULL!	0	#NULL!	0	#NULL!	0	0	0	0	0	0	-1.02124	2	2	#NULL!
112	t1112	2	24	2	2	2	1	2	#NULL!	3	99999	1	3	1	1	0	0	1	1	0	1	1	0	1	0	1	1	1	1	1	1	0	#NULL!	1	5	0	#NULL!	1	1	0	0	0	1	0	0	1.16174	3	1	3
113	w1114	1	20	2	2	3	3	2	#NULL!	3	6000	3	3	0	0	1	0	1	1	1	1	1	0	1	0	0	0	0	#NULL!	0	#NULL!	0	#NULL!	0	#NULL!	0	#NULL!	0	#NULL!	0	0	0	0	0	0	-0.950913	2	2	#NULL!
113	s0113	2	26	2	2	1	3	1	4000	3	99999	4	3	1	1	0	1	1	1	1	1	0	1	1	1	1	1	1	3	1	2	0	#NULL!	1	5	1	4	1	1	1	0	0	1	1	0	4.60413	4	1	4
113	t1113	2	26	2	2	1	1	2	#NULL!	1	99999	1	1	0	0	0	0	1	0	0	0	1	0	1	0	1	1	1	2	1	1	0	#NULL!	1	1	1	4	1	1	0	0	0	0	1	0	-1.62628	2	1	4
114	s0114	1	30	2	2	1	1	2	#NULL!	1	99999	1	1	0	1	0	1	1	0	1	0	1	0	1	1	0	1	1	3	1	2	0	#NULL!	1	5	1	10	0	#NULL!	1	0	0	1	1	0	2.71132	4	1	3
114	w1155	1	29	2	2	3	1	2	#NULL!	3	4000	1	3	0	0	1	0	1	1	1	1	0	1	1	0	1	0	0	#NULL!	0	#NULL!	0	#NULL!	0	#NULL!	0	#NULL!	0	#NULL!	0	0	0	0	0	0	-1.95063	1	1	3
114	t1114	2	28	2	2	3	1	2	#NULL!	1	99999	1	1	0	0	0	0	1	0	0	0	1	0	1	0	1	1	1	1	0	#NULL!	0	#NULL!	1	5	1	6	0	#NULL!	0	0	0	1	1	0	-1.98937	1	1	3
115	s0116	2	18	1	2	1	1	2	#NULL!	1	99999	1	1	0	1	0	1	1	1	1	1	1	0	1	1	0	1	1	3	1	2	0	#NULL!	0	#NULL!	1	1	1	1	1	0	0	0	0	0	3.84763	4	2	#NULL!
115	t1115	2	33	2	2	2	1	2	#NULL!	1	99999	1	1	0	1	0	0	1	1	0	0	1	0	1	0	1	1	1	2	0	#NULL!	0	#NULL!	0	#NULL!	0	#NULL!	1	1	0	0	0	0	0	0	-1.28901	2	1	3
115	w1143	2	27	2	1	1	2	2	#NULL!	2	5000	2	2	0	0	1	0	1	1	1	0	1	0	1	0	0	0	0	#NULL!	0	#NULL!	0	#NULL!	0	#NULL!	0	#NULL!	0	#NULL!	0	0	0	0	0	0	-1.74386	1	1	4
116	t1116	1	27	2	2	2	1	2	#NULL!	3	99999	1	3	1	1	1	0	1	1	1	1	1	0	1	1	1	1	1	2	1	2	0	#NULL!	1	4	1	3	1	5	0	0	0	1	0	1	3.39338	4	1	4
116	w1109	1	30	2	2	2	2	2	#NULL!	1	2000	2	1	0	0	1	0	1	1	1	0	1	1	0	1	0	1	0	#NULL!	0	#NULL!	0	#NULL!	0	#NULL!	0	#NULL!	0	#NULL!	0	0	0	0	0	0	-1.81419	1	1	3
116	s0117	2	25	2	2	1	3	1	3000	1	99999	4	1	1	1	0	1	1	1	1	1	1	0	1	1	0	1	0	#NULL!	1	5	0	#NULL!	0	#NULL!	0	#NULL!	1	1	0	1	0	0	0	0	4.57013	4	1	3
117	w1036	1	34	2	2	2	1	2	#NULL!	3	3000	1	3	0	0	1	0	1	1	1	0	1	0	1	0	1	0	0	#NULL!	0	#NULL!	0	#NULL!	0	#NULL!	0	#NULL!	0	#NULL!	0	0	0	0	0	0	-1.74386	1	1	3
117	t1117	2	25	2	2	2	1	2	#NULL!	1	99999	1	1	0	0	0	0	1	0	0	0	1	0	1	0	0	1	0	#NULL!	1	1	0	#NULL!	1	1	0	#NULL!	1	1	0	0	0	0	0	0	-2.28591	1	1	4
117	s0118	2	30	2	2	1	1	2	#NULL!	3	99999	1	3	1	1	1	0	1	1	0	1	1	0	1	1	0	1	1	1	1	1	0	#NULL!	1	3	0	#NULL!	1	2	0	0	0	0	0	1	2.22425	4	1	3
118	w1100	2	26	2	1	2	2	2	#NULL!	2	5000	2	2	1	1	1	1	1	1	1	1	1	1	1	1	1	0	0	#NULL!	0	1	0	#NULL!	0	#NULL!	0	#NULL!	0	#NULL!	0	0	0	0	0	0	2.99232	4	2	#NULL!
118	t1118	2	25	2	2	1	1	2	#NULL!	1	99999	1	1	0	0	0	0	0	0	0	0	1	0	1	0	0	1	0	#NULL!	0	#NULL!	0	#NULL!	0	#NULL!	1	2	0	#NULL!	0	0	0	0	0	0	-2.93679	1	1	3
119	w1153	1	30	2	2	2	3	2	#NULL!	2	5000	3	2	0	0	1	1	1	1	1	1	1	1	0	1	1	1	0	#NULL!	0	#NULL!	0	#NULL!	0	#NULL!	0	#NULL!	0	#NULL!	0	0	0	0	0	0	-0.013454	3	2	#NULL!
119	t1119	2	25	2	2	2	1	2	#NULL!	1	99999	1	1	0	1	0	0	0	0	0	0	1	0	1	0	1	1	1	1	1	1	0	#NULL!	1	5	1	5	1	1	0	0	0	1	1	0	-0.708083	2	1	4
119	s0119	2	35	2	2	1	1	2	#NULL!	1	99999	1	1	0	0	0	0	1	0	0	0	0	0	1	1	0	1	1	1	0	#NULL!	0	#NULL!	1	2	1	2	1	1	0	0	0	0	0	0	-2.25856	1	1	4
120	s0120	2	25	2	2	2	2	2	#NULL!	1	99999	2	1	0	0	0	1	1	0	0	0	1	0	1	1	0	1	1	1	0	#NULL!	0	#NULL!	1	3	1	5	0	#NULL!	0	0	0	0	1	0	-0.144431	3	1	4
120	t1120	2	20	2	2	2	1	2	#NULL!	1	99999	1	1	0	1	0	0	1	0	0	1	1	0	1	0	1	1	1	1	1	1	0	#NULL!	0	#NULL!	1	2	0	#NULL!	0	0	0	0	0	0	-1.22565	2	1	4
120	w1156	1	28	2	2	4	3	2	#NULL!	2	3800	3	2	1	1	1	1	1	1	1	1	1	1	1	1	1	1	0	#NULL!	0	#NULL!	0	#NULL!	0	#NULL!	0	#NULL!	0	#NULL!	0	0	0	0	0	0	2.99232	4	1	4
121	w1157	1	35	2	2	2	1	2	#NULL!	3	4000	1	3	0	0	1	0	1	1	1	0	1	0	1	0	1	0	0	#NULL!	0	#NULL!	0	#NULL!	0	#NULL!	0	#NULL!	0	#NULL!	0	0	0	0	0	0	-1.74386	1	2	#NULL!
121	t1121	2	28	2	2	1	1	2	#NULL!	1	99999	1	1	0	0	0	0	1	0	0	0	1	0	1	0	1	1	1	1	1	1	0	#NULL!	1	2	1	1	1	1	0	0	0	0	0	0	-1.72471	2	1	4
121	s0121	2	31	2	2	1	1	2	#NULL!	3	99999	1	3	0	1	0	0	0	1	0	1	1	0	0	0	1	1	0	#NULL!	0	#NULL!	0	#NULL!	1	3	1	2	0	#NULL!	0	0	0	0	0	0	-0.727726	2	1	3
122	s0122	2	33	2	2	1	1	2	#NULL!	1	3100	1	1	0	0	0	0	1	0	0	0	1	0	1	1	0	0	0	#NULL!	0	#NULL!	0	#NULL!	0	#NULL!	0	#NULL!	0	#NULL!	0	0	0	0	0	0	-2.66084	1	1	4
122	t1122	2	30	2	2	1	1	2	#NULL!	1	99999	1	1	0	0	0	0	1	0	0	1	1	0	1	0	1	1	1	2	1	2	0	#NULL!	1	11	1	14	1	1	0	0	0	1	1	0	-0.833341	2	1	4
122	w1158	1	24	2	2	2	1	2	#NULL!	3	5000	1	2	0	0	1	0	1	0	1	1	1	0	1	1	0	0	0	#NULL!	0	#NULL!	0	#NULL!	0	#NULL!	0	#NULL!	0	#NULL!	0	0	0	0	0	0	-1.04145	2	1	3
123	w1159	1	35	2	2	1	1	2	#NULL!	1	5000	1	1	0	0	1	0	1	0	1	0	1	0	1	0	1	0	0	#NULL!	0	#NULL!	0	#NULL!	0	#NULL!	0	#NULL!	0	#NULL!	0	0	0	0	0	0	-2.67155	1	2	#NULL!
123	t1123	2	27	2	2	1	1	2	#NULL!	1	99999	1	1	0	0	0	0	0	0	0	0	1	0	1	0	0	1	1	1	1	1	0	#NULL!	1	1	1	2	1	1	0	0	0	0	0	0	-1.72471	2	1	4
123	s0123	2	26	2	2	1	1	2	#NULL!	1	99999	1	1	0	0	0	0	0	1	0	1	1	0	1	1	0	0	0	#NULL!	0	#NULL!	0	#NULL!	0	#NULL!	0	#NULL!	0	#NULL!	0	0	0	0	0	0	-0.940201	2	1	3
124	w1160	1	38	3	2	2	1	2	#NULL!	2	6000	1	2	0	0	1	0	1	1	1	1	1	0	1	0	1	1	0	#NULL!	0	#NULL!	0	#NULL!	0	#NULL!	0	#NULL!	0	#NULL!	0	0	0	0	0	0	-0.950913	2	2	#NULL!
124	s0124	2	25	2	2	1	2	2	#NULL!	1	99999	2	1	0	0	0	1	1	0	0	0	0	0	1	0	0	1	1	3	1	2	0	#NULL!	0	#NULL!	1	4	1	1	1	0	0	0	1	0	-1.50887	2	1	3
124	t1124	2	22	2	2	3	1	2	#NULL!	1	99999	1	1	0	1	0	0	1	0	0	0	1	0	1	0	1	1	1	2	0	#NULL!	0	#NULL!	1	8	1	3	1	1	0	0	0	1	0	0	-0.806509	2	1	4
125	w1161	1	23	2	2	4	3	2	#NULL!	3	6000	1	3	0	0	1	0	1	1	1	1	1	0	1	0	1	0	0	#NULL!	0	#NULL!	0	#NULL!	0	#NULL!	0	#NULL!	0	#NULL!	0	0	0	0	0	0	-0.950913	2	2	#NULL!
125	s0125	2	23	2	2	2	2	2	#NULL!	1	99999	2	1	0	0	0	1	0	0	0	1	1	0	1	0	0	1	1	1	0	#NULL!	0	#NULL!	1	3	1	4	1	1	0	0	0	0	1	0	0.174447	3	1	3
125	t1125	1	32	2	2	2	1	2	#NULL!	1	99999	1	1	0	0	0	0	1	0	0	0	1	0	1	0	1	1	1	1	0	#NULL!	0	#NULL!	1	1	0	#NULL!	1	1	0	0	0	0	0	0	-2.28591	1	1	3
126	t1126	2	35	2	2	1	1	2	#NULL!	1	99999	1	1	0	0	0	0	1	0	0	0	1	0	1	0	0	1	0	#NULL!	0	#NULL!	0	#NULL!	0	#NULL!	0	#NULL!	0	#NULL!	0	0	0	0	0	0	-3.49799	1	1	3
126	s0126	2	33	2	2	1	1	2	#NULL!	1	99999	1	1	1	1	0	0	0	1	0	1	1	0	1	0	1	1	1	3	1	2	0	#NULL!	1	5	1	2	1	1	1	0	0	1	0	0	3.05256	4	1	4
126	w1162	1	23	2	2	1	1	2	#NULL!	3	2000	1	3	0	0	1	0	1	0	1	0	1	0	0	0	0	0	0	#NULL!	0	#NULL!	0	#NULL!	0	#NULL!	0	#NULL!	0	#NULL!	0	0	0	0	0	0	-3.95032	1	1	4
127	w1163	1	21	2	2	2	1	2	#NULL!	2	1500	1	2	0	0	1	0	1	1	1	1	0	1	1	0	1	1	0	#NULL!	0	#NULL!	0	#NULL!	0	#NULL!	0	#NULL!	0	#NULL!	0	0	0	0	0	0	-1.95063	1	2	#NULL!
127	t1127	2	30	2	2	1	1	2	#NULL!	1	99999	1	1	0	0	0	0	1	0	0	0	1	0	1	0	1	1	0	#NULL!	1	1	0	#NULL!	1	2	1	3	0	#NULL!	0	0	0	0	0	0	-2.0878	1	1	3
127	s0127	2	33	2	2	2	1	2	#NULL!	1	99999	1	1	1	1	0	0	1	1	0	0	1	0	1	0	0	1	1	2	1	1	0	#NULL!	1	2	1	3	1	1	0	0	0	0	0	0	0.929994	3	1	3
128	w1164	1	25	2	2	2	1	2	#NULL!	3	3000	1	3	0	0	1	0	1	1	1	0	1	1	1	1	1	1	0	#NULL!	0	#NULL!	0	#NULL!	0	#NULL!	0	#NULL!	0	#NULL!	0	0	0	0	0	0	-0.535419	2	2	#NULL!
128	s0128	2	32	2	2	1	1	2	#NULL!	1	99999	1	1	0	0	0	0	0	0	0	0	1	0	0	1	0	1	0	#NULL!	0	#NULL!	0	#NULL!	1	3	0	#NULL!	1	1	0	0	0	0	0	0	-2.72753	1	1	3
128	t1128	2	20	2	2	2	1	2	#NULL!	1	99999	1	1	0	0	0	0	1	0	0	0	1	0	1	0	1	1	0	#NULL!	0	#NULL!	0	#NULL!	0	#NULL!	1	5	0	#NULL!	0	0	0	0	1	0	-2.83837	1	1	4
129	w1165	1	25	2	2	2	1	2	#NULL!	3	#NULL!	1	3	0	0	1	0	1	1	1	1	0	1	0	1	0	0	0	#NULL!	0	#NULL!	0	#NULL!	0	#NULL!	0	#NULL!	0	#NULL!	0	0	0	0	0	0	-2.39224	1	2	#NULL!
129	s0129	2	25	2	2	1	1	2	#NULL!	1	99999	1	1	1	1	0	1	1	0	0	0	1	0	1	0	0	1	1	3	1	4	0	#NULL!	1	2	1	3	1	1	1	1	0	0	0	0	4.14423	4	1	3
129	t1129	2	25	2	2	2	1	2	#NULL!	1	99999	1	1	0	0	0	0	1	0	0	0	1	0	1	0	1	1	1	1	1	1	0	#NULL!	1	1	1	6	1	1	0	0	0	0	1	0	-1.62628	2	1	4
130	w1166	1	23	2	2	4	3	2	#NULL!	2	4000	3	2	0	0	1	0	1	0	0	0	0	0	1	1	1	1	0	#NULL!	0	#NULL!	0	#NULL!	0	#NULL!	0	#NULL!	0	#NULL!	0	0	0	0	0	0	-3.81332	1	2	#NULL!
130	s0130	2	27	2	2	1	1	2	#NULL!	1	99999	1	1	0	0	0	0	0	0	0	0	0	0	1	0	1	0	0	#NULL!	0	#NULL!	0	#NULL!	1	3	1	2	1	1	0	0	0	0	0	0	-3.09571	1	1	4
130	t1130	2	30	2	2	1	1	1	99999	1	99999	1	1	0	0	0	0	1	0	0	0	1	0	1	0	0	1	1	2	1	1	0	#NULL!	1	3	1	4	1	1	0	0	0	0	1	0	-1.62628	2	1	4
131	w1167	1	32	2	2	1	3	2	#NULL!	3	5000	4	3	0	0	1	0	1	0	1	0	1	0	1	0	1	0	0	#NULL!	0	#NULL!	0	#NULL!	0	#NULL!	0	#NULL!	0	#NULL!	0	0	0	0	0	0	-2.67155	1	2	#NULL!
131	s0131	2	36	3	2	1	1	2	#NULL!	1	99999	1	1	0	1	0	0	1	0	0	0	1	0	1	0	0	1	1	5	1	2	0	#NULL!	0	#NULL!	0	#NULL!	0	#NULL!	1	0	0	0	0	0	-1.25017	2	1	3
131	t1131	2	28	2	2	1	1	2	#NULL!	1	99999	1	1	0	1	0	0	1	0	1	0	1	0	1	0	1	1	1	2	1	1	0	#NULL!	1	2	1	4	1	1	0	0	0	0	1	0	-0.100159	3	1	4
132	s0132	2	25	2	2	1	1	2	#NULL!	1	99999	1	1	1	1	0	0	0	0	0	0	1	1	0	0	1	1	1	3	1	2	0	#NULL!	1	5	1	3	1	1	1	0	0	1	0	0	0.424437	3	1	3
132	w1168	1	27	2	2	2	3	2	#NULL!	2	4000	4	2	0	0	1	0	1	1	1	1	1	1	1	1	1	0	0	#NULL!	0	#NULL!	0	#NULL!	0	#NULL!	0	#NULL!	0	#NULL!	0	0	0	0	0	0	0.257525	3	1	3
132	t1132	2	30	2	2	1	1	2	#NULL!	1	99999	1	1	0	1	0	0	1	0	0	0	1	0	1	0	1	1	1	2	1	2	0	#NULL!	1	4	1	6	1	1	0	0	0	1	1	0	-0.708083	2	1	4
133	w1169	1	34	2	2	2	1	2	#NULL!	3	2000	1	2	0	0	0	0	0	1	1	1	1	1	1	1	1	1	0	#NULL!	0	#NULL!	0	#NULL!	0	#NULL!	0	#NULL!	0	#NULL!	0	0	0	0	0	0	0.039005	3	2	#NULL!
133	s0133	2	30	2	2	1	1	2	#NULL!	1	99999	1	1	0	0	0	1	1	0	0	0	1	0	1	0	0	1	1	5	1	2	0	#NULL!	0	#NULL!	0	#NULL!	0	#NULL!	1	0	0	0	0	0	-1.16058	2	1	3
133	t1134	2	36	3	2	1	1	2	#NULL!	1	99999	1	1	0	1	0	0	1	1	0	0	1	0	1	0	1	1	1	2	1	1	0	#NULL!	0	#NULL!	1	2	1	1	0	0	0	0	0	0	-0.727807	2	1	3
134	w1170	1	37	3	2	2	3	2	#NULL!	3	2000	3	2	1	1	1	1	0	1	1	0	0	1	0	1	0	1	0	#NULL!	0	#NULL!	0	#NULL!	0	#NULL!	0	#NULL!	0	#NULL!	0	0	0	0	0	0	-0.45039	2	2	#NULL!
134	s0134	2	35	2	2	1	1	2	#NULL!	1	99999	1	1	0	0	0	0	1	1	0	1	0	0	1	0	0	1	1	1	0	#NULL!	0	#NULL!	0	#NULL!	0	#NULL!	1	1	0	0	0	0	0	0	-2.78527	1	1	4
134	t1134	2	25	2	2	2	1	2	#NULL!	1	99999	1	1	0	1	0	0	1	1	0	0	1	0	1	1	1	1	1	2	1	1	1	1	1	4	0	#NULL!	1	2	0	0	0	1	0	1	2.35248	4	1	3
135	s0135	2	20	2	2	1	1	2	#NULL!	1	99999	1	1	0	0	0	0	1	0	0	1	0	0	1	1	0	1	0	#NULL!	0	#NULL!	0	#NULL!	1	3	0	#NULL!	1	1	0	0	0	0	0	0	-2.02682	1	2	#NULL!
135	w1171	1	32	2	2	2	1	2	#NULL!	3	5000	1	3	0	0	1	0	1	1	0	1	0	1	0	1	0	0	0	#NULL!	0	#NULL!	0	#NULL!	0	#NULL!	0	#NULL!	0	#NULL!	0	0	0	0	0	0	-3.00017	1	1	3
135	t1135	2	30	2	2	1	1	2	#NULL!	1	99999	1	1	1	1	0	0	1	1	1	0	1	0	1	0	1	1	1	2	1	1	0	#NULL!	1	1	1	2	1	1	0	0	0	0	0	0	1.53792	3	1	3
136	s0136	2	35	2	2	1	1	2	#NULL!	1	99999	1	1	1	0	0	0	0	0	0	1	1	0	1	0	1	1	1	3	1	2	0	#NULL!	0	#NULL!	1	3	1	1	1	0	0	0	0	0	0.35767	3	2	#NULL!
136	w1172	1	24	2	2	4	1	2	#NULL!	2	4000	1	2	0	0	1	0	1	1	1	0	1	0	1	1	1	0	0	#NULL!	0	#NULL!	0	#NULL!	0	#NULL!	0	#NULL!	0	#NULL!	0	0	0	0	0	0	-0.906702	2	2	#NULL!
136	t1136	1	30	2	2	4	3	2	#NULL!	2	6000	3	2	1	1	1	0	1	1	1	1	1	0	1	0	1	1	0	#NULL!	0	#NULL!	0	#NULL!	0	#NULL!	0	#NULL!	0	#NULL!	0	0	0	0	0	0	0.776098	3	1	3
137	w1173	1	30	2	2	2	3	2	#NULL!	1	3000	3	1	1	0	1	0	1	1	1	0	0	1	1	0	1	1	0	#NULL!	0	#NULL!	0	#NULL!	0	#NULL!	0	#NULL!	0	#NULL!	0	0	0	0	0	0	-1.93477	1	2	#NULL!
137	s0137	2	25	2	2	1	1	2	#NULL!	1	99999	1	1	0	1	0	1	1	0	1	0	1	0	1	0	0	1	1	5	1	2	0	#NULL!	1	3	1	4	1	2	1	0	0	0	1	1	2.2441	4	1	3
137	t1137	1	25	2	2	3	1	2	#NULL!	3	99999	1	3	1	1	1	0	1	1	1	1	1	0	1	0	1	0	0	#NULL!	0	#NULL!	0	#NULL!	0	#NULL!	0	#NULL!	0	#NULL!	0	0	0	0	0	0	0.776098	3	1	3
138	s0138	1	30	2	2	1	1	2	#NULL!	1	99999	1	1	1	1	1	0	1	1	1	1	1	0	1	1	0	1	1	6	1	2	0	#NULL!	1	4	1	6	1	2	1	0	0	1	1	1	4.82143	4	1	3
138	t1138	1	20	2	2	2	1	2	#NULL!	3	99999	1	3	1	1	1	0	1	1	1	1	1	0	1	0	1	1	0	#NULL!	1	1	0	#NULL!	0	#NULL!	0	#NULL!	0	#NULL!	0	0	0	0	0	0	0.776098	3	1	3
138	w1174	2	32	2	2	3	3	2	#NULL!	3	5000	3	3	0	0	0	0	1	1	1	1	0	1	1	1	1	1	0	#NULL!	0	#NULL!	0	#NULL!	0	#NULL!	0	#NULL!	0	#NULL!	0	0	0	0	0	0	-1.332	2	1	3
139	w1175	1	34	2	2	2	3	2	#NULL!	3	2500	4	2	0	0	1	0	1	0	0	0	1	1	1	0	0	1	0	#NULL!	0	#NULL!	0	#NULL!	0	#NULL!	0	#NULL!	0	#NULL!	0	0	0	0	0	0	-2.90819	1	1	3
139	t1139	1	18	1	2	2	1	2	#NULL!	3	99999	1	3	1	1	1	0	1	1	1	0	1	0	1	0	1	1	1	1	0	#NULL!	0	#NULL!	1	3	0	#NULL!	0	#NULL!	0	0	0	0	0	0	0.832147	3	2	#NULL!
139	s0139	2	25	2	2	1	1	2	#NULL!	1	99999	1	1	1	1	0	0	1	1	1	0	1	1	1	1	1	1	0	#NULL!	0	#NULL!	0	#NULL!	1	3	1	2	1	1	0	0	0	0	0	0	2.74635	4	1	3
140	w1176	2	36	3	1	1	2	2	#NULL!	3	30000	2	2	0	0	0	0	1	0	1	0	1	1	1	1	1	1	0	#NULL!	0	#NULL!	0	#NULL!	0	#NULL!	0	#NULL!	0	#NULL!	0	0	0	0	0	0	-1.68163	2	2	#NULL!
140	s0140	2	25	2	2	1	1	2	#NULL!	3	99999	1	3	0	0	0	0	1	1	1	1	1	0	1	0	0	0	0	#NULL!	0	#NULL!	0	#NULL!	1	4	1	3	0	#NULL!	0	0	0	1	0	0	0.240763	3	2	#NULL!
140	t1140	1	20	2	2	2	3	2	#NULL!	3	99999	4	3	1	1	1	0	1	1	0	0	1	0	1	0	1	0	0	#NULL!	0	#NULL!	0	#NULL!	0	#NULL!	0	#NULL!	0	#NULL!	0	0	0	0	0	0	-0.62477	2	1	3
141	s0141	1	28	2	2	1	1	2	#NULL!	1	99999	1	1	0	0	0	1	0	0	0	1	1	0	1	1	0	1	0	#NULL!	1	2	0	#NULL!	1	2	0	#NULL!	1	1	0	0	0	0	0	0	0.351974	3	2	#NULL!
141	w1177	1	33	2	2	4	3	2	#NULL!	2	6000	4	2	1	1	1	1	1	1	1	1	1	1	0	1	0	1	1	12	1	12	0	#NULL!	0	#NULL!	0	#NULL!	0	#NULL!	1	1	0	0	0	0	4.8477	4	2	#NULL!
141	t1141	1	32	2	2	2	1	2	#NULL!	2	4000	1	2	0	0	1	0	1	1	0	1	1	0	1	0	1	1	0	#NULL!	0	#NULL!	0	#NULL!	0	#NULL!	0	#NULL!	0	#NULL!	0	0	0	0	0	0	-1.55884	2	1	3
142	t1142	1	28	2	2	1	1	2	#NULL!	2	99999	1	2	0	0	1	0	1	0	0	0	1	0	1	0	1	0	0	#NULL!	0	#NULL!	0	#NULL!	0	#NULL!	0	#NULL!	0	#NULL!	0	0	0	0	0	0	-3.27948	1	2	#NULL!
142	w1178	1	23	2	2	3	3	2	#NULL!	2	3000	3	2	0	0	1	0	1	0	1	0	1	0	1	0	1	0	0	#NULL!	0	#NULL!	0	#NULL!	0	#NULL!	0	#NULL!	0	#NULL!	0	0	0	0	0	0	-2.67155	1	2	#NULL!
142	s0142	2	25	2	2	3	3	1	3900	2	6700	3	2	0	0	1	0	1	1	1	0	1	0	1	1	1	0	0	#NULL!	0	#NULL!	0	#NULL!	0	#NULL!	0	#NULL!	0	#NULL!	0	0	0	0	0	0	-0.906702	2	1	3
143	t1143	1	30	2	2	1	1	2	#NULL!	1	99999	1	1	0	0	0	0	0	0	0	0	1	0	0	0	0	1	0	#NULL!	0	#NULL!	0	#NULL!	0	#NULL!	0	#NULL!	1	1	0	0	0	0	0	0	-4.41367	1	2	#NULL!
143	s0143	2	30	2	2	1	1	2	#NULL!	3	99999	1	3	0	1	1	0	0	1	0	1	0	0	1	1	0	1	1	3	1	2	0	#NULL!	1	5	1	4	1	2	1	0	0	1	1	1	2.03369	4	1	3
143	w1179	1	32	2	2	4	2	2	#NULL!	2	2000	2	2	1	1	1	1	1	1	1	1	1	1	1	1	1	0	0	#NULL!	0	#NULL!	0	#NULL!	0	#NULL!	0	#NULL!	0	#NULL!	0	0	0	0	0	0	2.99232	4	1	1
144	s0144	2	25	2	2	1	1	2	#NULL!	1	99999	1	1	0	0	0	0	1	1	0	0	0	0	1	0	0	1	0	#NULL!	1	2	0	#NULL!	0	#NULL!	0	#NULL!	0	#NULL!	0	0	0	0	0	0	-3.9413	1	2	#NULL!
144	t1144	1	24	2	2	2	1	2	#NULL!	1	99999	1	1	1	1	1	0	1	0	0	1	1	0	1	0	0	1	0	#NULL!	0	#NULL!	0	#NULL!	0	#NULL!	0	#NULL!	0	#NULL!	0	0	0	0	0	0	-0.75952	2	1	3
144	w1001	1	18	1	2	4	1	2	#NULL!	2	7000	1	2	0	0	1	0	1	1	1	1	1	1	1	0	1	0	0	#NULL!	0	#NULL!	0	#NULL!	0	#NULL!	0	#NULL!	0	#NULL!	0	0	0	0	0	0	-0.57963	2	1	3
145	s0145	2	34	2	2	1	1	2	#NULL!	1	99999	1	1	1	1	1	0	0	1	1	1	1	0	1	1	0	1	1	5	1	2	0	#NULL!	1	6	1	4	1	2	1	0	0	1	1	1	4.82143	4	2	#NULL!
145	w1184	1	29	2	2	3	1	2	#NULL!	2	5000	1	2	0	0	1	0	1	1	0	1	1	0	1	0	0	0	0	#NULL!	0	#NULL!	0	#NULL!	0	#NULL!	0	#NULL!	0	#NULL!	0	0	0	0	0	0	-1.55884	2	2	#NULL!
145	t1145	1	27	2	2	1	1	2	#NULL!	2	5000	1	2	0	0	1	0	0	1	0	0	1	0	1	0	1	1	0	#NULL!	0	#NULL!	0	#NULL!	0	#NULL!	0	#NULL!	0	#NULL!	0	0	0	0	0	0	-2.35178	1	1	3
146	w1185	1	22	2	2	4	3	2	#NULL!	2	2000	1	2	0	0	1	0	1	1	1	1	1	1	0	1	0	0	0	#NULL!	0	#NULL!	0	#NULL!	0	#NULL!	0	#NULL!	0	#NULL!	0	0	0	0	0	0	-1.02124	2	2	#NULL!
146	t1146	1	20	2	2	2	1	2	#NULL!	3	99999	1	3	1	1	1	0	1	1	1	1	1	0	1	0	1	1	0	#NULL!	0	#NULL!	0	#NULL!	0	#NULL!	0	#NULL!	0	#NULL!	0	0	0	0	0	0	0.776098	3	2	#NULL!
146	s0146	2	20	2	2	2	1	2	#NULL!	3	99999	1	3	0	0	0	0	0	1	0	0	1	0	1	0	0	1	0	#NULL!	0	#NULL!	0	#NULL!	0	#NULL!	0	#NULL!	0	#NULL!	0	0	0	0	0	0	-2.5703	1	1	4
147	s0147	2	30	2	2	1	1	2	#NULL!	1	2800	1	1	1	1	0	0	1	1	0	1	1	1	1	1	1	1	1	6	1	3	0	#NULL!	1	4	1	3	1	2	1	1	0	1	0	1	6.07236	4	1	3
147	t1147	1	21	2	2	4	3	1	5000	2	99999	3	2	1	1	1	0	1	0	1	0	1	0	1	0	1	0	0	#NULL!	0	#NULL!	0	#NULL!	0	#NULL!	0	#NULL!	0	#NULL!	0	0	0	0	0	0	-0.944541	2	2	#NULL!
147	w1186	1	29	2	2	3	1	2	#NULL!	3	1000	1	3	0	0	1	0	1	1	1	1	1	1	0	1	0	0	0	#NULL!	0	#NULL!	0	#NULL!	0	#NULL!	0	#NULL!	0	#NULL!	0	0	0	0	0	0	-1.02124	2	1	3
148	w1187	1	28	2	2	3	3	2	#NULL!	3	6000	4	3	0	0	1	0	1	1	1	1	1	1	0	1	0	1	0	#NULL!	0	#NULL!	0	#NULL!	0	#NULL!	0	#NULL!	0	#NULL!	0	0	0	0	0	0	-1.02124	2	2	#NULL!
148	s0148	2	30	2	2	1	2	2	#NULL!	1	99999	2	1	1	1	1	0	1	1	0	1	1	0	1	1	0	1	1	1	0	#NULL!	0	#NULL!	0	#NULL!	0	#NULL!	1	1	0	0	0	0	0	0	1.36842	3	2	#NULL!
148	t1148	2	32	2	2	2	1	2	#NULL!	1	99999	1	1	0	0	0	0	0	0	0	0	1	0	0	1	0	1	1	1	1	1	0	#NULL!	1	1	1	4	1	1	0	0	0	0	1	0	-2.0679	1	1	4
149	w1188	1	30	2	2	3	1	2	#NULL!	2	6000	1	2	0	1	0	1	0	1	1	1	1	1	1	1	1	1	0	#NULL!	0	#NULL!	0	#NULL!	0	#NULL!	0	#NULL!	0	#NULL!	0	0	0	0	0	0	1.965	4	1	3
149	s0149	2	30	2	2	1	1	2	#NULL!	3	99999	1	3	0	0	0	0	0	1	0	0	1	1	1	0	1	1	1	2	0	#NULL!	0	#NULL!	1	5	1	2	1	1	0	0	0	1	0	0	-0.425734	2	1	3
149	t1149	2	25	2	2	3	1	2	#NULL!	1	99999	1	1	1	1	0	0	1	1	0	1	1	0	1	0	1	1	0	#NULL!	0	#NULL!	0	#NULL!	0	#NULL!	0	#NULL!	0	#NULL!	0	0	0	0	0	0	-0.050346	3	1	4
150	w1189	1	20	2	2	4	3	2	#NULL!	3	#NULL!	1	3	0	0	1	0	1	0	0	0	1	0	1	0	0	0	0	#NULL!	0	#NULL!	0	#NULL!	0	#NULL!	0	#NULL!	0	#NULL!	0	0	0	0	0	0	-3.27948	1	2	#NULL!
150	s0150	2	28	2	1	1	1	2	#NULL!	3	6000	1	2	0	0	0	0	0	0	0	1	1	0	1	1	1	1	1	4	1	2	0	#NULL!	1	5	1	3	0	#NULL!	1	0	0	1	0	0	0.871921	3	1	3
150	t1150	2	29	2	2	1	1	2	#NULL!	1	99999	1	1	0	0	0	0	1	0	0	0	1	0	1	0	1	1	1	1	1	1	0	#NULL!	1	1	1	2	1	1	0	0	0	0	0	0	-1.72471	2	1	4
151	s0151	2	28	2	2	1	1	2	#NULL!	1	99999	1	1	1	1	0	1	1	0	1	1	1	1	1	1	1	1	1	1	1	1	0	#NULL!	0	#NULL!	1	2	1	1	0	0	0	0	0	0	2.7704	4	1	3
151	w1190	1	29	2	2	4	3	2	#NULL!	2	5000	3	2	0	0	1	0	1	1	1	1	1	1	1	1	1	1	0	#NULL!	0	#NULL!	0	#NULL!	0	#NULL!	0	#NULL!	0	#NULL!	0	0	0	0	0	0	0.257525	3	1	3
151	t1151	2	35	2	2	1	1	2	#NULL!	1	99999	1	1	0	0	0	0	0	0	0	0	1	0	1	0	0	1	0	#NULL!	1	1	0	#NULL!	1	3	1	7	0	#NULL!	0	0	0	0	1	0	-1.98937	1	1	3
152	t1152	2	19	1	2	2	1	2	#NULL!	3	3000	1	2	0	0	0	0	1	1	0	0	1	0	1	1	0	0	0	#NULL!	0	#NULL!	0	#NULL!	0	#NULL!	0	#NULL!	0	#NULL!	0	0	0	0	0	0	-1.73315	2	2	#NULL!
152	s1152	2	26	2	2	1	1	2	#NULL!	1	99999	1	1	1	1	0	0	1	1	0	1	1	0	1	1	1	1	1	2	0	#NULL!	0	#NULL!	1	6	1	3	0	#NULL!	0	0	0	1	0	0	2.197	4	1	3
152	w1191	1	36	3	2	1	1	2	#NULL!	1	2000	1	1	0	1	0	1	1	1	1	1	0	1	1	1	1	0	0	#NULL!	0	#NULL!	0	#NULL!	0	#NULL!	0	#NULL!	0	#NULL!	0	0	0	0	0	0	0.593993	3	1	3
153	s0153	2	21	2	2	1	1	2	#NULL!	3	99999	1	3	1	1	1	0	1	1	1	1	1	1	1	1	1	1	1	2	1	1	0	#NULL!	0	#NULL!	0	#NULL!	1	1	0	0	0	0	0	0	2.34762	4	2	#NULL!
153	t1153	1	25	2	2	2	1	1	99999	3	99999	1	3	1	1	1	0	1	1	1	1	1	0	1	0	1	0	0	#NULL!	0	#NULL!	0	#NULL!	0	#NULL!	0	#NULL!	0	#NULL!	0	0	0	0	0	0	0.776098	3	1	3
153	w1192	1	21	2	2	2	3	2	#NULL!	3	5000	4	2	0	0	1	0	1	0	1	1	1	1	0	1	1	1	1	22	0	#NULL!	0	#NULL!	0	#NULL!	0	#NULL!	0	#NULL!	1	0	0	0	0	0	-0.619314	2	1	3
154	w1193	1	25	2	2	2	1	2	#NULL!	3	6000	1	2	0	0	1	0	1	0	1	0	1	1	1	1	0	0	0	#NULL!	0	#NULL!	0	#NULL!	0	#NULL!	0	#NULL!	0	#NULL!	0	0	0	0	0	0	-1.46311	2	1	3
154	t1154	1	25	2	2	2	1	2	#NULL!	3	2000	1	2	0	0	1	0	1	1	0	0	1	0	0	0	0	1	0	#NULL!	0	#NULL!	0	#NULL!	0	#NULL!	0	#NULL!	0	#NULL!	0	0	0	0	0	0	-3.63055	1	2	#NULL!
154	s0154	2	22	2	2	1	1	2	#NULL!	1	99999	1	1	1	1	0	0	1	1	0	1	1	1	1	1	1	1	1	3	1	2	0	#NULL!	1	6	1	3	1	1	1	0	0	1	0	0	4.261	4	1	3
155	w1194	1	29	2	2	4	3	2	#NULL!	2	5000	3	2	0	0	1	0	0	0	0	0	0	0	1	0	1	1	0	#NULL!	0	#NULL!	0	#NULL!	0	#NULL!	0	#NULL!	0	#NULL!	0	0	0	0	0	0	-4.65048	1	2	#NULL!
155	s0155	2	35	2	2	1	1	2	#NULL!	1	99999	1	1	1	1	0	0	0	0	1	0	1	1	1	1	1	1	1	3	1	2	1	2	1	2	1	5	1	2	1	0	0	0	1	1	5.20205	4	1	3
155	t1155	1	25	2	2	2	1	2	#NULL!	3	99999	1	3	0	1	1	0	1	1	0	0	1	0	1	0	0	1	0	#NULL!	0	#NULL!	0	#NULL!	0	#NULL!	0	#NULL!	0	#NULL!	0	0	0	0	0	0	-1.43358	2	1	3
156	w1195	1	28	2	2	2	1	2	#NULL!	3	#NULL!	1	3	0	0	1	0	1	0	1	0	1	0	1	0	1	1	1	22	0	#NULL!	0	#NULL!	0	#NULL!	0	#NULL!	0	#NULL!	1	0	0	0	0	0	-1.34193	2	1	3
156	s0156	2	30	2	2	1	1	2	#NULL!	1	99999	1	1	1	1	0	0	0	1	1	1	1	0	1	0	1	1	1	4	1	2	0	#NULL!	0	#NULL!	1	1	1	2	1	0	0	0	0	1	2.81833	4	1	3
156	t1156	2	18	1	2	3	1	2	#NULL!	1	99999	1	1	0	1	0	0	1	0	0	0	1	0	1	0	0	1	1	2	1	1	0	#NULL!	1	1	1	5	1	2	0	0	0	0	1	1	-0.701239	2	1	3
157	s0157	2	33	2	2	1	1	2	#NULL!	1	99999	1	1	1	1	0	0	1	1	0	1	1	1	1	1	1	1	1	2	1	1	0	#NULL!	0	#NULL!	1	4	1	2	0	0	0	0	1	1	2.18765	4	1	4
157	t1157	2	23	2	2	3	1	2	#NULL!	1	99999	1	1	0	0	0	0	1	1	0	0	1	0	1	0	0	1	0	#NULL!	0	#NULL!	0	#NULL!	0	#NULL!	0	#NULL!	0	#NULL!	0	0	0	0	0	0	-2.5703	1	1	3
157	w1196	1	36	3	2	4	3	2	#NULL!	2	4000	3	2	0	0	1	1	1	0	1	0	1	1	1	1	0	1	0	#NULL!	0	#NULL!	0	#NULL!	0	#NULL!	0	#NULL!	0	#NULL!	0	0	0	0	0	0	-0.455326	2	1	3
158	w1197	1	31	2	2	3	3	2	#NULL!	2	7000	3	2	0	0	0	0	1	0	1	0	1	1	1	0	1	0	0	#NULL!	0	#NULL!	0	#NULL!	0	#NULL!	0	#NULL!	0	#NULL!	0	0	0	0	0	0	-2.51879	1	2	#NULL!
158	s0158	2	26	2	2	1	1	2	#NULL!	1	99999	1	1	1	1	0	1	1	1	0	1	1	0	1	1	1	1	1	2	0	#NULL!	0	#NULL!	1	3	0	#NULL!	1	1	0	0	0	0	0	0	3.00668	4	1	4
159	w1198	1	25	2	2	2	3	2	#NULL!	2	5000	4	2	1	1	1	1	1	1	1	1	1	1	1	1	1	1	1	11	0	#NULL!	1	22	0	#NULL!	0	#NULL!	0	#NULL!	1	0	1	0	0	0	10.3254	4	2	#NULL!
159	t1159	1	24	2	2	2	3	1	1200	3	99999	4	3	0	0	0	0	0	0	0	1	0	1	0	0	0	1	0	#NULL!	0	#NULL!	0	#NULL!	0	#NULL!	0	#NULL!	0	#NULL!	0	0	0	0	0	0	-4.98354	1	1	3
159	s0159	2	26	2	2	1	1	2	#NULL!	1	99999	1	1	1	1	0	0	1	1	0	1	1	1	1	1	1	1	1	3	1	2	0	#NULL!	1	6	1	5	1	2	1	0	0	1	1	1	4.36627	4	1	3
160	w1199	1	23	2	2	3	3	1	2	2	8000	3	2	1	1	1	1	1	1	1	1	1	1	1	1	1	1	0	#NULL!	0	#NULL!	0	#NULL!	0	#NULL!	0	#NULL!	0	#NULL!	0	0	0	0	0	0	2.99232	4	1	3
160	s0160	2	28	2	2	1	1	2	#NULL!	1	99999	1	1	1	1	1	0	1	1	0	1	1	0	1	1	0	1	1	3	1	1	0	#NULL!	0	#NULL!	0	#NULL!	1	1	1	0	0	0	0	0	2.69804	4	1	3
160	t1160	2	22	2	2	2	1	2	#NULL!	1	99999	1	1	0	0	0	0	0	0	0	0	1	0	1	0	0	1	1	1	1	1	0	#NULL!	1	1	1	1	1	1	0	0	0	0	0	0	-1.72471	2	1	4
161	s0161	2	33	2	2	1	1	2	#NULL!	1	99999	1	1	1	1	0	0	1	1	0	1	1	1	1	1	1	1	1	3	1	2	0	#NULL!	1	7	1	3	1	2	1	0	0	1	0	1	4.26784	4	1	4
161	t1161	1	27	2	2	3	3	1	99999	3	99999	4	3	1	1	1	0	1	1	1	1	1	0	1	0	1	0	0	#NULL!	0	#NULL!	0	#NULL!	0	#NULL!	0	#NULL!	0	#NULL!	0	0	0	0	0	0	0.776098	3	1	3
161	w1200	1	30	2	2	2	1	2	#NULL!	3	6000	1	3	0	0	1	1	0	1	1	1	0	1	0	1	1	1	1	12	0	#NULL!	0	#NULL!	0	#NULL!	0	#NULL!	0	#NULL!	1	0	0	0	0	0	-0.054835	3	1	3
162	w1201	1	29	2	2	4	3	2	#NULL!	2	5000	3	2	0	0	1	0	1	1	1	1	1	0	1	1	1	0	0	#NULL!	0	#NULL!	0	#NULL!	0	#NULL!	0	#NULL!	0	#NULL!	0	0	0	0	0	0	-0.113758	3	2	#NULL!
162	s0162	2	35	2	2	1	1	2	#NULL!	1	99999	1	1	1	1	0	0	1	1	0	1	1	1	1	1	1	1	1	4	1	2	0	#NULL!	1	8	1	4	1	2	1	0	0	1	1	1	4.36627	4	1	3
162	t1162	2	19	1	2	2	1	2	#NULL!	1	99999	1	1	0	1	0	1	1	1	1	0	1	0	0	0	1	1	0	#NULL!	0	#NULL!	0	#NULL!	0	#NULL!	0	#NULL!	0	#NULL!	0	0	0	0	0	0	-1.31515	2	1	4
163	w1202	1	29	2	2	3	1	2	#NULL!	2	6000	1	2	0	0	1	0	1	0	1	1	1	0	1	0	1	1	0	#NULL!	0	#NULL!	0	#NULL!	0	#NULL!	0	#NULL!	0	#NULL!	0	0	0	0	0	0	-1.87861	1	2	#NULL!
163	s0163	2	25	2	2	1	1	2	#NULL!	1	99999	1	1	1	1	0	0	1	1	0	1	1	1	1	1	1	1	1	3	1	2	0	#NULL!	1	8	1	6	1	2	1	0	0	1	1	1	4.36627	4	1	3
163	t1163	2	25	2	2	2	1	2	#NULL!	3	1000	1	2	0	1	0	0	0	0	0	0	1	0	1	0	0	1	0	#NULL!	0	#NULL!	0	#NULL!	1	5	1	2	0	#NULL!	0	0	0	1	0	0	-1.1696	2	1	1
164	s0164	2	27	2	2	1	1	2	#NULL!	1	99999	1	1	1	1	0	0	1	1	0	1	1	1	1	1	1	1	1	2	1	1	0	#NULL!	1	3	1	2	1	1	0	0	0	0	0	0	2.93138	4	2	#NULL!
164	t1164	2	20	2	2	2	1	2	#NULL!	1	99999	1	1	0	1	0	0	0	0	0	0	1	0	1	0	0	1	0	#NULL!	1	1	0	#NULL!	1	1	0	#NULL!	0	#NULL!	0	0	0	0	0	0	-1.7308	2	2	#NULL!
164	w1203	1	34	2	2	3	1	2	#NULL!	3	4000	1	3	1	1	0	0	0	1	0	1	0	1	1	1	0	1	0	#NULL!	1	12	0	#NULL!	0	#NULL!	0	#NULL!	0	#NULL!	0	1	0	0	0	0	1.59161	3	1	3
165	w1204	1	29	2	2	2	1	2	#NULL!	3	1000	1	3	1	1	1	1	1	1	1	1	1	1	0	1	0	1	0	#NULL!	0	#NULL!	0	#NULL!	0	#NULL!	0	#NULL!	0	#NULL!	0	0	0	0	0	0	1.71356	4	2	#NULL!
165	s0165	2	25	2	2	1	1	2	#NULL!	1	99999	1	1	1	1	0	0	1	1	0	1	1	1	1	1	1	1	1	3	1	1	0	#NULL!	1	3	1	4	1	1	1	0	0	0	1	0	4.35942	4	1	4
165	t1165	2	27	2	2	2	1	2	#NULL!	3	99999	1	3	0	0	0	0	0	0	0	0	1	0	1	0	0	1	1	2	1	2	0	#NULL!	0	#NULL!	0	#NULL!	0	#NULL!	0	0	0	0	0	0	-3.49799	1	1	4
166	w1205	1	21	2	2	4	3	2	#NULL!	3	6000	3	3	0	0	1	1	1	1	1	1	1	1	1	1	0	1	0	#NULL!	0	#NULL!	0	#NULL!	0	#NULL!	0	#NULL!	0	#NULL!	0	0	0	0	0	0	1.26531	3	2	#NULL!
166	s0166	2	23	2	2	2	1	2	#NULL!	2	5000	1	2	1	1	0	0	1	1	0	1	0	0	1	1	0	1	1	4	1	3	1	2	1	5	1	1	1	1	1	1	0	1	0	0	6.27173	4	1	3
166	t1166	2	23	2	2	2	1	2	#NULL!	1	99999	1	1	0	0	0	0	1	0	0	0	1	0	1	0	0	1	1	2	0	#NULL!	0	#NULL!	0	#NULL!	1	6	1	1	0	0	0	0	1	0	-2.47528	1	1	4
167	w1206	1	21	2	2	2	1	2	#NULL!	3	5000	1	2	0	0	0	1	1	1	1	1	1	1	1	0	1	0	0	#NULL!	0	#NULL!	0	#NULL!	0	#NULL!	0	#NULL!	0	#NULL!	0	0	0	0	0	0	0.209638	3	2	#NULL!
167	s0167	2	19	1	2	2	1	2	#NULL!	1	4500	1	1	0	0	0	0	1	1	0	1	1	0	1	1	0	1	1	6	0	#NULL!	0	#NULL!	1	3	1	4	1	2	1	0	0	0	1	1	2.26797	4	1	4
167	t1167	2	30	2	2	1	1	2	#NULL!	1	99999	1	1	0	0	0	0	1	0	0	0	1	0	1	0	0	0	0	#NULL!	1	1	0	#NULL!	0	#NULL!	1	2	1	1	0	0	0	0	0	0	-2.5737	1	1	3
168	w1207	1	20	2	2	3	1	2	#NULL!	3	5000	1	3	0	0	1	0	1	0	1	1	1	1	1	1	0	1	0	#NULL!	1	22	0	#NULL!	0	#NULL!	0	#NULL!	0	#NULL!	0	1	0	0	0	0	1.13435	3	2	#NULL!
168	s0168	2	28	2	2	1	1	2	#NULL!	1	8750	1	1	0	1	0	0	1	0	0	1	1	1	1	1	0	1	0	#NULL!	0	#NULL!	0	#NULL!	0	#NULL!	0	#NULL!	0	#NULL!	0	0	0	0	0	0	-0.57841	2	1	4
168	t1168	2	30	2	2	2	1	2	#NULL!	1	99999	1	1	0	0	0	0	1	0	0	0	1	0	1	0	0	1	1	1	0	#NULL!	0	#NULL!	0	#NULL!	1	7	1	1	0	0	0	0	1	0	-2.47528	1	1	4
169	t1169	2	30	2	2	2	1	2	#NULL!	1	99999	1	1	1	0	0	0	1	0	0	0	1	0	1	0	0	1	0	#NULL!	1	1	0	#NULL!	1	3	0	#NULL!	1	1	0	0	0	0	0	0	-1.4771	2	2	#NULL!
169	s0169	2	30	2	2	2	1	2	#NULL!	1	99999	1	1	1	1	0	0	1	0	1	1	1	1	1	1	1	1	1	2	1	2	0	#NULL!	1	2	1	2	1	1	0	0	0	0	0	0	2.6116	4	1	4
169	w1180	2	30	2	2	2	1	2	#NULL!	3	4000	1	3	0	0	1	1	1	1	1	1	1	1	1	1	1	1	0	#NULL!	0	#NULL!	0	#NULL!	0	#NULL!	0	#NULL!	0	#NULL!	0	0	0	0	0	0	1.26531	3	1	3
170	w1181	1	32	2	2	2	1	2	#NULL!	3	#NULL!	1	2	0	0	1	0	1	1	1	1	1	1	1	1	1	1	0	#NULL!	1	22	0	#NULL!	0	#NULL!	0	#NULL!	0	#NULL!	0	1	0	0	0	0	2.06204	4	1	3
170	t1170	2	25	2	2	2	1	2	#NULL!	1	99999	1	1	0	0	0	0	1	0	0	0	1	0	1	0	0	1	0	#NULL!	1	1	0	#NULL!	0	#NULL!	1	3	1	1	0	0	0	0	0	0	-2.5737	1	2	#NULL!
170	s0170	2	22	2	2	2	1	2	#NULL!	3	99999	1	3	0	0	0	0	0	0	0	1	1	1	1	0	1	1	1	2	1	2	0	#NULL!	1	3	0	#NULL!	1	2	0	0	0	0	0	1	-1.11484	2	1	3
171	t1171	1	32	2	2	3	1	2	#NULL!	2	3000	1	2	1	1	1	0	1	1	0	0	1	0	1	0	0	1	1	1	0	#NULL!	0	#NULL!	0	#NULL!	0	#NULL!	0	#NULL!	0	0	0	0	0	0	-0.62477	2	1	3
171	w1115	1	22	2	2	4	1	2	#NULL!	3	5000	1	3	0	0	1	0	1	1	1	1	1	1	1	0	1	0	0	#NULL!	0	#NULL!	0	#NULL!	0	#NULL!	0	#NULL!	0	#NULL!	0	0	0	0	0	0	-0.57963	2	1	4
171	s0171	2	30	2	2	1	1	2	#NULL!	1	99999	1	1	1	1	0	0	1	1	1	1	1	1	1	1	1	1	1	4	1	4	0	#NULL!	1	6	1	7	1	4	1	1	0	1	1	1	6.77871	4	1	3
172	s0172	2	30	2	2	2	1	2	#NULL!	1	5000	1	1	0	1	0	1	1	1	0	1	1	1	1	1	1	1	1	5	1	3	0	#NULL!	1	2	1	4	1	2	1	1	0	0	1	1	6.36977	4	1	3
172	w1116	1	22	2	2	3	1	2	#NULL!	3	4000	1	3	0	0	1	0	1	1	1	1	1	1	0	1	1	0	0	#NULL!	0	#NULL!	0	#NULL!	0	#NULL!	0	#NULL!	0	#NULL!	0	0	0	0	0	0	-1.02124	2	1	3
172	t1172	2	20	2	1	1	1	2	#NULL!	1	99999	1	1	0	1	0	0	0	0	0	0	1	0	1	0	0	1	0	#NULL!	0	#NULL!	0	#NULL!	0	#NULL!	0	#NULL!	1	1	0	0	0	0	0	0	-2.2167	1	1	4
173	t1173	1	28	2	2	3	1	2	#NULL!	2	9056	1	2	1	1	0	0	1	1	1	1	1	0	1	0	1	1	0	#NULL!	0	#NULL!	0	#NULL!	0	#NULL!	0	#NULL!	0	#NULL!	0	0	0	0	0	0	0.557578	3	1	4
173	s0173	2	25	2	2	1	1	2	#NULL!	1	4600	1	1	0	1	0	0	1	0	0	1	1	0	1	1	0	1	1	2	1	4	0	#NULL!	1	3	1	5	1	2	0	1	0	0	1	1	2.73338	4	1	3
173	w1117	1	28	2	2	2	2	2	#NULL!	3	4000	2	3	0	0	0	1	0	1	1	1	1	1	1	1	0	0	0	#NULL!	0	#NULL!	0	#NULL!	0	#NULL!	0	#NULL!	0	#NULL!	0	0	0	0	0	0	1.04679	3	1	3
174	t1174	1	25	2	2	4	1	2	#NULL!	2	6000	1	2	1	1	1	0	1	1	1	1	1	0	1	0	1	1	0	#NULL!	0	#NULL!	0	#NULL!	0	#NULL!	0	#NULL!	0	#NULL!	0	0	0	0	0	0	0.776098	3	1	4
174	s0174	2	28	2	1	2	3	2	#NULL!	1	2000	4	1	1	0	0	1	1	1	0	1	1	0	1	0	0	1	0	#NULL!	1	2	0	#NULL!	1	3	1	5	1	1	0	0	0	0	1	0	1.91095	4	1	3
174	w1118	1	25	2	2	3	1	2	#NULL!	3	5000	1	2	0	0	0	1	0	1	0	1	1	1	1	1	0	0	0	#NULL!	0	#NULL!	0	#NULL!	0	#NULL!	0	#NULL!	0	#NULL!	0	0	0	0	0	0	0.438869	3	1	3
175	t1175	1	17	1	2	2	1	2	#NULL!	3	99999	1	3	0	0	1	0	1	1	0	0	1	0	1	0	0	0	0	#NULL!	0	#NULL!	0	#NULL!	0	#NULL!	1	1	0	#NULL!	0	0	0	0	0	0	-1.79058	1	2	#NULL!
175	s0175	2	19	1	2	2	1	2	#NULL!	3	3000	1	3	1	1	0	0	1	1	0	0	1	1	1	0	1	1	1	3	1	3	0	#NULL!	1	4	1	10	1	1	1	1	0	1	1	0	4.53384	4	1	3
175	w1119	1	24	2	2	1	1	2	#NULL!	3	3000	1	2	0	0	0	1	0	1	0	1	1	1	1	0	1	0	1	22	0	#NULL!	0	#NULL!	0	#NULL!	0	#NULL!	0	#NULL!	1	0	0	0	0	0	0.931337	3	1	3
176	t1176	1	21	2	2	2	1	2	#NULL!	1	99999	1	1	1	1	1	0	1	1	1	0	1	0	1	0	1	1	1	2	1	1	0	#NULL!	0	#NULL!	1	7	1	1	0	0	0	0	1	0	1.00587	3	2	#NULL!
176	s0176	2	38	3	2	1	1	2	#NULL!	3	4500	1	3	0	0	0	0	0	1	0	1	1	1	1	0	1	1	1	2	1	2	0	#NULL!	1	2	1	4	1	2	0	0	0	0	1	1	0.47248	3	1	3
176	w1120	1	21	2	2	4	2	2	#NULL!	3	1000	2	3	1	0	0	0	0	0	0	1	0	0	0	0	0	0	0	#NULL!	0	#NULL!	0	#NULL!	0	#NULL!	0	#NULL!	0	#NULL!	0	0	0	0	0	0	-4.54601	1	1	3
177	s0177	2	24	2	2	2	1	2	#NULL!	3	4500	1	3	0	0	0	0	0	0	1	0	0	1	0	1	0	1	1	22	0	#NULL!	0	#NULL!	0	#NULL!	0	#NULL!	0	#NULL!	1	0	0	0	0	0	-3.00178	1	2	#NULL!
177	t1177	1	32	2	2	2	3	1	99999	1	99999	4	1	1	1	1	0	1	1	1	0	1	0	1	0	0	1	0	#NULL!	0	#NULL!	0	#NULL!	0	#NULL!	0	#NULL!	0	#NULL!	0	0	0	0	0	0	-0.016846	3	1	3
177	w1121	1	29	2	2	2	1	2	#NULL!	3	4000	1	3	0	0	1	1	1	1	1	1	1	1	0	1	0	1	1	12	0	#NULL!	0	#NULL!	0	#NULL!	0	#NULL!	0	#NULL!	1	0	0	0	0	0	1.31617	3	1	3
178	t1178	1	30	2	2	2	3	2	#NULL!	3	99999	4	3	0	0	1	0	1	1	1	0	1	1	1	0	0	1	0	#NULL!	0	#NULL!	1	1	1	3	1	3	0	#NULL!	0	0	0	0	0	0	1.98611	4	1	3
178	s0178	1	43	3	2	1	1	2	#NULL!	3	4400	1	3	0	0	0	0	0	0	0	0	1	1	1	0	1	1	1	2	1	2	0	#NULL!	1	3	1	2	1	3	0	0	0	0	0	1	-1.34658	2	1	3
178	w1122	1	20	2	2	2	1	2	#NULL!	3	4000	1	3	0	0	1	0	1	1	1	1	1	0	1	0	1	1	1	11	0	#NULL!	0	#NULL!	0	#NULL!	0	#NULL!	0	#NULL!	1	0	0	0	0	0	0.378709	3	1	4
179	s0179	2	30	2	2	1	1	2	#NULL!	1	4350	1	1	1	1	0	0	1	0	0	0	1	1	1	1	1	1	1	1	1	1	0	#NULL!	1	2	0	#NULL!	1	1	0	0	0	0	0	0	0.649535	3	2	#NULL!
179	w1123	1	23	2	2	3	3	2	#NULL!	3	5000	1	3	0	1	0	1	1	1	1	1	1	0	1	0	1	1	1	12	0	#NULL!	0	#NULL!	0	#NULL!	0	#NULL!	0	#NULL!	1	0	0	0	0	0	2.08618	4	1	4
179	t1179	2	20	2	2	2	1	2	#NULL!	1	99999	1	1	0	0	0	0	1	0	0	0	1	0	1	0	0	1	1	2	0	#NULL!	0	#NULL!	1	4	1	4	0	#NULL!	0	0	0	1	1	0	-1.98937	1	1	3
180	w1124	1	32	2	2	2	1	2	#NULL!	2	2000	1	2	0	1	0	1	1	1	1	1	1	0	1	0	1	1	0	#NULL!	0	#NULL!	0	#NULL!	0	#NULL!	0	#NULL!	0	#NULL!	0	0	0	0	0	0	0.756558	3	1	3
180	s0180	2	35	2	2	1	3	1	5000	1	6000	4	1	0	1	0	0	0	1	1	1	1	1	1	0	0	1	1	2	1	1	0	#NULL!	0	#NULL!	1	1	1	2	0	0	0	0	0	1	1.05119	3	2	#NULL!
180	t1180	1	23	2	2	2	1	2	#NULL!	3	99999	1	3	1	1	1	0	1	1	1	1	1	0	1	0	1	1	0	#NULL!	0	#NULL!	0	#NULL!	0	#NULL!	0	#NULL!	0	#NULL!	0	0	0	0	0	0	0.776098	3	2	#NULL!
181	w1125	1	33	2	2	1	1	2	#NULL!	2	2000	1	2	1	0	1	0	1	0	1	0	1	0	1	1	1	1	0	#NULL!	0	#NULL!	0	#NULL!	0	#NULL!	0	#NULL!	0	#NULL!	0	0	0	0	0	0	-1.02559	2	1	3
181	t1181	1	25	2	2	3	1	2	#NULL!	3	99999	1	3	1	1	1	0	1	1	1	1	1	0	1	0	1	0	0	#NULL!	0	#NULL!	0	#NULL!	1	7	0	#NULL!	0	#NULL!	0	0	0	1	0	0	1.62509	4	1	3
181	s0181	2	30	2	1	2	1	2	#NULL!	1	37502	1	1	0	0	1	1	1	0	1	0	0	1	1	1	1	1	1	3	0	#NULL!	0	#NULL!	1	2	1	3	1	1	1	0	0	0	0	0	1.27658	3	1	4
182	t1182	1	19	1	2	2	1	2	#NULL!	3	99999	1	3	0	0	1	0	1	0	0	0	1	0	1	0	1	1	0	#NULL!	0	#NULL!	0	#NULL!	0	#NULL!	0	#NULL!	0	#NULL!	0	0	0	0	0	0	-3.27948	1	1	1
182	s0182	2	20	2	1	3	1	2	#NULL!	3	4000	1	3	1	1	0	0	0	1	1	1	1	1	1	0	1	1	1	4	1	3	1	3	0	#NULL!	1	2	1	1	1	1	1	0	0	0	10.9907	4	1	1
182	w1126	1	25	2	2	1	1	2	#NULL!	3	4000	1	3	0	0	1	1	1	1	1	1	1	0	1	0	1	1	0	#NULL!	0	#NULL!	0	#NULL!	0	#NULL!	0	#NULL!	0	#NULL!	0	0	0	0	0	0	0.056875	3	1	3
183	s0183	1	18	1	2	2	1	2	#NULL!	3	7000	1	3	1	1	0	0	0	1	1	1	0	1	1	0	1	1	0	#NULL!	1	2	0	#NULL!	1	5	0	#NULL!	0	#NULL!	0	0	0	1	0	0	0.406851	3	2	#NULL!
183	t1183	1	24	2	2	4	3	1	4600	2	7000	3	2	1	1	1	0	1	1	1	1	1	0	1	1	1	1	0	#NULL!	0	#NULL!	0	#NULL!	0	#NULL!	1	2	0	#NULL!	0	0	0	0	0	0	2.17446	4	1	4
183	w1127	1	24	2	2	1	1	2	#NULL!	3	4000	1	3	0	0	1	0	1	0	1	0	1	1	1	1	1	0	1	1	0	#NULL!	0	#NULL!	0	#NULL!	0	#NULL!	0	#NULL!	0	0	0	0	0	0	-1.46311	2	1	3
184	s0184	1	23	2	2	3	1	2	#NULL!	2	6000	1	2	0	0	1	0	1	1	0	1	1	0	1	0	1	1	0	#NULL!	0	#NULL!	0	#NULL!	0	#NULL!	0	#NULL!	0	#NULL!	0	0	0	0	0	0	-1.55884	2	2	#NULL!
184	t1184	1	25	2	2	3	1	2	#NULL!	2	2000	1	2	0	1	1	0	1	1	1	0	1	0	1	0	0	1	0	#NULL!	0	#NULL!	0	#NULL!	0	#NULL!	0	#NULL!	0	#NULL!	0	0	0	0	0	0	-0.825654	2	2	#NULL!
184	w1128	1	18	1	2	1	3	2	#NULL!	3	#NULL!	3	3	0	0	1	0	1	0	1	0	1	0	1	0	1	0	0	#NULL!	0	#NULL!	0	#NULL!	0	#NULL!	0	#NULL!	0	#NULL!	0	0	0	0	0	0	-2.67155	1	1	4
185	s0185	2	28	2	2	1	1	2	#NULL!	1	10500	1	1	1	1	0	0	1	1	0	1	0	1	1	1	0	1	1	2	1	3	0	#NULL!	1	1	1	2	1	1	0	1	0	0	0	0	3.36489	4	2	#NULL!
185	t1185	2	24	2	2	3	1	2	#NULL!	1	99999	1	1	0	0	0	0	1	0	0	0	1	0	1	0	0	1	1	2	0	#NULL!	0	#NULL!	1	1	1	1	1	1	0	0	0	0	0	0	-1.72471	2	1	4
185	w1129	1	20	2	2	3	1	2	#NULL!	3	4000	1	3	0	0	1	0	1	1	1	1	0	1	1	1	1	1	0	#NULL!	0	#NULL!	0	#NULL!	0	#NULL!	0	#NULL!	0	#NULL!	0	0	0	0	0	0	-1.11348	2	1	3
186	s0186	2	20	2	2	2	1	2	#NULL!	1	3000	1	1	0	1	0	1	1	1	1	1	0	1	1	1	0	1	1	3	0	#NULL!	1	2	1	1	1	1	1	1	1	0	0	0	0	0	5.64539	4	1	1
186	t1186	2	27	2	2	2	1	2	#NULL!	1	99999	1	1	0	0	0	0	1	0	0	0	1	0	1	0	0	1	1	1	1	2	0	#NULL!	1	3	1	5	1	1	0	0	0	0	1	0	-1.62628	2	1	3
186	w1130	1	27	2	2	2	1	2	#NULL!	3	8000	1	3	0	0	0	1	0	1	0	1	0	1	0	1	0	0	0	#NULL!	0	#NULL!	0	#NULL!	0	#NULL!	0	#NULL!	0	#NULL!	0	0	0	0	0	0	-2.2109	1	1	3
187	s0187	2	25	2	1	1	1	2	#NULL!	1	5000	1	1	0	0	0	0	1	0	0	0	1	0	0	1	0	1	1	4	0	#NULL!	0	#NULL!	1	3	1	4	1	2	1	0	0	0	1	1	-0.731431	2	1	3
187	w1131	1	23	2	2	2	1	2	#NULL!	3	5000	1	3	1	1	1	0	0	0	0	0	1	1	1	1	1	1	1	12	0	#NULL!	0	#NULL!	0	#NULL!	0	#NULL!	0	#NULL!	1	0	0	0	0	0	0.985595	3	1	3
187	t1187	2	20	2	2	2	1	2	#NULL!	2	99999	1	2	0	0	0	0	1	0	0	0	1	0	1	0	1	1	1	2	1	1	0	#NULL!	0	#NULL!	1	3	1	1	0	0	0	0	0	0	-2.5737	1	1	4
188	s0188	2	28	2	1	1	1	2	#NULL!	1	4500	1	1	0	0	0	0	0	0	0	0	1	0	1	0	0	1	0	#NULL!	0	#NULL!	0	#NULL!	0	#NULL!	0	#NULL!	0	#NULL!	0	0	0	0	0	0	-3.49799	1	1	3
188	t1188	2	21	2	2	2	1	2	#NULL!	1	99999	1	1	0	0	0	0	1	0	0	0	1	0	1	0	1	1	1	1	0	#NULL!	0	#NULL!	1	3	1	1	1	1	0	0	0	0	0	0	-1.72471	2	1	4
188	w1132	1	28	2	2	2	1	2	#NULL!	3	6000	1	3	0	0	0	0	1	0	1	0	1	1	1	0	1	0	1	12	0	#NULL!	0	#NULL!	0	#NULL!	0	#NULL!	0	#NULL!	1	0	0	0	0	0	-1.18917	2	1	3
189	s0189	2	22	2	2	2	1	2	#NULL!	1	2500	1	1	0	1	1	0	1	1	1	1	1	0	1	0	0	1	1	5	0	#NULL!	0	#NULL!	1	4	1	3	1	2	1	0	0	1	0	1	3.07704	4	2	#NULL!
189	w1133	1	25	2	2	3	2	2	#NULL!	1	5000	2	1	0	0	1	0	1	1	1	1	0	1	1	1	0	0	1	11	0	#NULL!	0	#NULL!	0	#NULL!	0	#NULL!	0	#NULL!	1	0	0	0	0	0	0.216144	3	2	#NULL!
189	t1189	2	20	2	2	2	1	2	#NULL!	1	99999	1	1	0	0	0	0	1	0	0	1	0	0	1	0	0	1	0	#NULL!	0	#NULL!	0	#NULL!	1	2	1	7	1	1	0	0	0	0	1	0	-2.20434	1	1	4
190	s0190	2	37	3	2	1	1	2	#NULL!	1	2750	1	1	0	0	0	0	1	1	1	0	1	0	1	1	1	1	0	#NULL!	0	#NULL!	0	#NULL!	0	#NULL!	1	2	0	#NULL!	0	0	0	0	0	0	-0.56402	2	2	#NULL!
190	t1190	1	25	2	2	1	1	2	#NULL!	3	99999	1	3	0	0	0	0	1	0	0	0	1	1	1	0	0	1	0	#NULL!	0	#NULL!	0	#NULL!	0	#NULL!	1	3	1	1	0	0	0	0	0	0	-2.20242	1	1	3
190	w1134	1	30	2	2	3	1	2	#NULL!	2	3000	1	2	0	0	1	0	1	1	1	1	1	1	1	1	0	1	0	#NULL!	0	#NULL!	0	#NULL!	0	#NULL!	0	#NULL!	0	#NULL!	0	0	0	0	0	0	0.257525	3	1	3
191	w1135	1	25	2	1	1	2	2	#NULL!	3	4000	2	3	0	0	0	1	1	1	1	1	1	1	0	0	0	1	1	22	0	#NULL!	0	#NULL!	0	#NULL!	0	#NULL!	0	#NULL!	1	0	0	0	0	0	0.260493	3	2	#NULL!
191	t1191	1	28	2	2	2	1	2	#NULL!	3	99999	1	3	1	1	1	0	1	1	0	0	1	0	1	0	1	0	0	#NULL!	0	#NULL!	0	#NULL!	0	#NULL!	1	3	0	#NULL!	0	0	0	0	0	0	-0.063568	3	1	3
191	s0191	2	25	2	1	2	1	2	#NULL!	1	7500	1	1	1	1	0	0	1	1	0	1	1	1	1	1	1	1	1	2	1	3	0	#NULL!	1	4	1	3	1	2	0	1	0	1	0	1	4.74274	4	1	3
192	s0192	1	20	2	2	2	1	2	#NULL!	3	3000	1	2	0	0	0	0	1	1	0	0	0	0	1	0	1	0	0	#NULL!	0	#NULL!	0	#NULL!	0	#NULL!	0	#NULL!	0	#NULL!	0	0	0	0	0	0	-3.9413	1	2	#NULL!
192	t1192	1	26	2	2	2	1	2	#NULL!	1	99999	1	1	1	1	1	0	1	1	0	0	1	0	1	0	1	1	1	2	0	#NULL!	0	#NULL!	0	#NULL!	0	#NULL!	0	#NULL!	0	0	0	0	0	0	-0.62477	2	1	3
192	w1136	1	25	2	2	3	1	2	#NULL!	3	5000	1	3	0	0	1	0	1	1	1	1	1	1	1	1	1	0	0	#NULL!	0	#NULL!	0	#NULL!	0	#NULL!	0	#NULL!	0	#NULL!	0	0	0	0	0	0	0.257525	3	1	3
193	w1137	1	20	2	2	3	1	2	#NULL!	3	6000	1	2	0	0	1	0	1	1	1	1	1	1	0	1	1	1	0	#NULL!	0	#NULL!	0	#NULL!	0	#NULL!	0	#NULL!	0	#NULL!	0	0	0	0	0	0	-1.02124	2	1	3
193	s0193	2	20	2	2	2	1	2	#NULL!	1	2500	1	1	0	1	0	0	0	0	0	0	0	0	1	1	0	1	1	6	1	4	1	2	1	5	1	1	1	1	1	1	0	1	0	0	3.74228	4	2	#NULL!
193	t1193	2	20	2	2	2	1	2	#NULL!	1	99999	1	1	0	1	0	0	1	0	0	0	1	0	1	1	0	1	0	#NULL!	0	#NULL!	0	#NULL!	1	4	1	5	0	#NULL!	0	0	0	1	1	0	-0.234016	2	1	3
194	w1138	1	22	2	2	2	1	2	#NULL!	2	6000	1	2	0	0	1	0	1	0	1	0	1	0	1	1	1	1	0	#NULL!	0	#NULL!	0	#NULL!	0	#NULL!	0	#NULL!	0	#NULL!	0	0	0	0	0	0	-1.8344	1	2	#NULL!
194	s0194	2	38	3	2	1	1	2	#NULL!	3	4750	1	3	0	0	0	0	0	0	0	0	1	0	1	0	1	1	0	#NULL!	0	#NULL!	0	#NULL!	0	#NULL!	0	#NULL!	0	#NULL!	0	0	0	0	0	0	-3.49799	1	2	#NULL!
194	t1194	1	27	2	2	2	1	2	#NULL!	3	99999	1	3	1	1	1	0	1	1	1	1	1	0	1	0	1	0	0	#NULL!	0	#NULL!	0	#NULL!	0	#NULL!	0	#NULL!	0	#NULL!	0	0	0	0	0	0	0.776098	3	2	#NULL!
195	w1139	1	22	2	2	2	1	2	#NULL!	1	40002	1	1	0	0	0	0	1	0	0	1	0	1	0	1	1	0	0	#NULL!	0	#NULL!	0	#NULL!	0	#NULL!	0	#NULL!	0	#NULL!	0	0	0	0	0	0	-4.14638	1	1	4
195	s0195	2	25	2	2	1	1	2	#NULL!	1	7000	1	1	1	1	0	0	0	1	0	0	1	0	1	0	0	1	1	2	1	2	0	#NULL!	1	2	0	#NULL!	1	1	0	0	0	0	0	0	0.368792	3	1	3
195	t1195	2	25	2	2	2	1	2	#NULL!	1	99999	1	1	0	0	0	0	1	0	0	0	1	0	1	0	0	1	0	#NULL!	0	#NULL!	0	#NULL!	0	#NULL!	0	#NULL!	0	#NULL!	0	0	0	0	0	0	-3.49799	1	1	4
196	w1140	1	21	2	2	3	1	2	#NULL!	3	6000	1	3	0	0	1	0	1	1	1	1	1	1	0	1	1	1	1	22	0	#NULL!	0	#NULL!	0	#NULL!	0	#NULL!	0	#NULL!	1	0	0	0	0	0	0.30838	3	2	#NULL!
196	s0196	2	20	2	2	1	1	2	#NULL!	1	3800	1	1	1	1	0	0	0	1	0	0	0	0	0	0	0	1	1	2	0	#NULL!	0	#NULL!	0	#NULL!	1	6	1	1	0	0	0	0	1	0	-2.47034	1	1	3
196	t1201	2	30	2	2	2	1	2	#NULL!	1	1500	1	1	0	1	0	1	1	0	1	1	1	1	1	0	1	1	1	2	1	2	0	#NULL!	1	1	1	4	1	1	0	0	0	0	1	0	2.07186	4	1	4
197	w1141	1	25	2	2	2	1	2	#NULL!	2	4000	1	2	0	0	1	0	1	1	1	1	1	1	1	1	1	0	0	#NULL!	0	#NULL!	0	#NULL!	0	#NULL!	0	#NULL!	0	#NULL!	0	0	0	0	0	0	0.257525	3	2	#NULL!
197	s0197	2	38	3	2	1	1	2	#NULL!	3	3000	1	3	0	0	0	0	0	1	0	0	1	1	1	0	1	1	1	1	0	#NULL!	0	#NULL!	0	#NULL!	0	#NULL!	0	#NULL!	0	0	0	0	0	0	-2.19902	1	1	3
197	t1202	2	30	2	2	2	1	2	#NULL!	1	1000	1	1	0	0	0	1	1	1	0	0	1	0	1	0	0	1	1	1	0	#NULL!	0	#NULL!	1	2	0	#NULL!	1	1	0	0	0	0	0	0	-0.350431	2	1	3
198	s0198	2	27	2	2	1	1	2	#NULL!	1	4400	1	1	1	1	0	1	1	1	1	1	1	1	1	1	1	1	1	2	1	2	1	1	1	1	1	4	1	1	0	0	0	0	1	0	6.59401	4	1	3
198	w1142	1	32	2	2	2	1	2	#NULL!	1	3000	1	1	1	1	1	1	1	1	1	0	1	0	1	1	1	0	0	#NULL!	0	#NULL!	0	#NULL!	0	#NULL!	0	#NULL!	0	#NULL!	0	0	0	0	0	0	1.8281	4	1	3
198	t1203	1	20	2	2	3	1	2	#NULL!	2	2000	1	2	0	0	1	1	1	1	1	1	1	0	1	1	1	1	0	#NULL!	0	#NULL!	0	#NULL!	0	#NULL!	1	6	0	#NULL!	0	0	0	0	1	0	1.55366	3	2	#NULL!
199	s0199	2	23	2	2	2	1	2	#NULL!	3	2700	1	3	0	0	0	0	0	1	0	0	1	1	1	0	0	1	1	2	0	#NULL!	0	#NULL!	1	7	1	1	1	1	0	0	0	1	0	0	-0.425734	2	2	#NULL!
199	w1144	1	29	2	2	2	1	2	#NULL!	3	4000	1	3	0	0	1	0	1	1	1	1	1	1	0	1	1	1	1	12	0	#NULL!	0	#NULL!	0	#NULL!	0	#NULL!	0	#NULL!	1	0	0	0	0	0	0.30838	3	2	#NULL!
199	t1204	2	29	2	2	2	1	2	#NULL!	1	99999	1	1	0	1	0	1	1	1	0	1	1	0	1	0	0	0	1	2	1	1	0	#NULL!	1	5	1	4	1	1	0	0	0	1	1	0	2.02034	4	1	3
200	s0200	1	23	2	2	2	1	1	2000	3	5000	1	2	0	1	0	0	1	0	1	1	0	0	0	1	0	1	0	#NULL!	0	#NULL!	0	#NULL!	0	#NULL!	0	#NULL!	0	#NULL!	0	0	0	0	0	0	-2.99154	1	2	#NULL!
200	w1145	1	28	2	1	2	1	2	#NULL!	3	4000	1	3	0	0	0	1	0	1	0	1	0	1	0	1	1	1	0	#NULL!	0	#NULL!	0	#NULL!	0	#NULL!	0	#NULL!	0	#NULL!	0	0	0	0	0	0	-2.2109	1	2	#NULL!
200	t1205	2	30	2	2	2	1	2	#NULL!	1	99999	1	1	0	1	0	1	1	0	0	1	1	0	1	0	0	1	1	2	0	#NULL!	0	#NULL!	0	#NULL!	1	9	1	2	0	0	0	0	1	1	0.250501	3	1	4
201	s0201	1	22	2	2	2	1	2	#NULL!	1	12000	1	1	1	1	1	0	1	1	0	1	0	0	0	1	1	0	0	#NULL!	0	#NULL!	0	#NULL!	0	#NULL!	0	#NULL!	0	#NULL!	0	0	0	0	0	0	-1.64444	2	2	#NULL!
201	t1206	2	39	3	2	2	1	2	#NULL!	1	99999	1	1	0	1	0	1	1	0	0	0	1	0	1	1	1	1	1	2	1	1	0	#NULL!	1	2	1	4	1	2	0	0	0	0	1	1	1.1437	3	2	#NULL!
201	w1146	1	25	2	2	3	1	2	#NULL!	2	3000	1	2	0	0	0	1	1	1	1	0	1	1	1	0	1	0	0	#NULL!	0	#NULL!	0	#NULL!	0	#NULL!	0	#NULL!	0	#NULL!	0	0	0	0	0	0	-0.583306	2	2	#NULL!
202	w1147	1	28	2	2	4	2	2	#NULL!	3	6000	2	2	0	0	1	0	1	1	1	1	1	1	0	1	1	0	0	#NULL!	0	#NULL!	0	#NULL!	0	#NULL!	0	#NULL!	0	#NULL!	0	0	0	0	0	0	-1.02124	2	2	#NULL!
202	s0202	1	27	2	2	3	1	2	#NULL!	3	4000	1	3	0	0	1	0	1	1	1	1	1	0	1	0	0	1	1	3	1	4	0	#NULL!	1	5	1	6	1	3	1	1	0	1	1	1	4.06178	4	2	#NULL!
202	t1207	2	23	2	2	3	1	2	#NULL!	1	99999	1	1	0	0	0	1	1	0	0	1	1	0	1	1	1	1	0	#NULL!	0	#NULL!	0	#NULL!	0	#NULL!	1	7	0	#NULL!	0	0	0	0	1	0	-0.200479	3	1	4
203	w1182	2	31	2	2	2	1	2	#NULL!	3	4000	1	3	0	0	0	1	1	1	0	0	1	1	1	0	0	0	1	11	0	#NULL!	0	#NULL!	0	#NULL!	0	#NULL!	0	#NULL!	1	0	0	0	0	0	0.138392	3	1	3
203	s0203	1	24	2	2	2	3	1	3000	3	10000	4	2	0	1	0	0	0	1	1	1	0	0	1	1	0	1	0	#NULL!	1	3	0	#NULL!	1	3	1	2	0	#NULL!	0	1	0	0	0	0	2.42964	4	2	#NULL!
203	t1208	2	28	2	2	2	1	2	#NULL!	1	99999	1	1	0	1	0	1	1	1	0	1	1	0	1	0	1	1	1	1	0	#NULL!	0	#NULL!	1	2	1	3	0	#NULL!	0	0	0	0	0	0	1.55883	3	2	#NULL!
204	s0204	1	36	3	2	1	1	2	#NULL!	3	2000	1	2	1	1	0	0	1	1	1	1	0	0	1	0	1	0	0	#NULL!	0	#NULL!	0	#NULL!	0	#NULL!	0	#NULL!	0	#NULL!	0	0	0	0	0	0	-0.813424	2	2	#NULL!
204	t1209	2	18	1	2	2	1	2	#NULL!	1	99999	1	1	0	0	0	1	1	0	0	0	1	0	1	0	0	1	0	#NULL!	0	#NULL!	0	#NULL!	1	5	0	#NULL!	1	1	0	0	0	1	0	0	-1.27813	2	2	#NULL!
204	w1183	1	32	2	2	4	3	2	#NULL!	3	4000	4	3	1	1	1	1	1	1	1	1	1	1	1	1	1	1	1	12	0	#NULL!	0	#NULL!	0	#NULL!	0	#NULL!	0	#NULL!	1	0	0	0	0	0	4.32195	4	1	3
205	s0205	1	35	2	2	2	1	2	#NULL!	3	3000	1	3	0	0	1	1	1	1	0	1	1	0	1	0	1	1	0	#NULL!	0	#NULL!	0	#NULL!	1	3	1	2	0	#NULL!	0	0	0	0	0	0	0.859146	3	2	#NULL!
205	t1210	2	25	2	2	2	1	2	#NULL!	1	99999	1	1	0	1	0	1	1	1	0	1	1	0	1	1	1	1	1	2	1	1	0	#NULL!	1	7	1	2	1	1	0	0	0	1	0	0	2.75907	4	2	#NULL!
205	w1076	1	24	2	2	1	1	2	#NULL!	1	8000	1	1	0	0	1	0	1	0	1	1	1	0	1	0	1	1	1	22	0	#NULL!	0	#NULL!	0	#NULL!	0	#NULL!	0	#NULL!	1	0	0	0	0	0	-0.548985	2	1	3
206	s0206	1	32	2	2	2	3	1	5000	3	5000	4	3	1	1	1	0	1	1	1	1	0	0	1	0	1	0	0	#NULL!	0	#NULL!	0	#NULL!	0	#NULL!	0	#NULL!	0	#NULL!	0	0	0	0	0	0	-0.594905	2	2	#NULL!
206	t1211	2	34	2	2	2	1	1	3000	1	99999	1	1	0	1	0	1	1	1	1	0	1	0	1	1	1	1	1	2	1	1	0	#NULL!	1	7	1	4	1	1	0	0	0	1	1	0	2.67248	4	1	3
206	w1114	1	30	2	2	2	1	2	#NULL!	3	4000	1	3	1	1	1	1	1	1	1	1	1	1	1	0	1	1	1	12	0	#NULL!	0	#NULL!	0	#NULL!	0	#NULL!	0	#NULL!	1	0	0	0	0	0	3.48479	4	1	3
207	s0207	1	23	2	2	4	1	2	#NULL!	2	8000	1	2	0	0	1	0	1	1	1	1	0	0	1	0	1	0	0	#NULL!	0	#NULL!	0	#NULL!	0	#NULL!	0	#NULL!	0	#NULL!	0	0	0	0	0	0	-2.32192	1	2	#NULL!
207	w1208	1	30	2	2	3	1	2	#NULL!	3	4000	1	3	1	0	1	0	1	0	1	0	1	0	1	1	0	0	1	1	0	#NULL!	0	#NULL!	0	#NULL!	0	#NULL!	0	#NULL!	0	0	0	0	0	0	-1.02559	2	2	#NULL!
207	t1212	2	26	2	2	2	1	2	#NULL!	1	99999	1	1	0	0	0	1	1	0	0	1	1	0	1	0	1	1	1	1	1	1	0	#NULL!	1	4	1	5	0	#NULL!	0	0	0	1	1	0	-0.188642	3	1	3
208	s0208	1	28	2	2	2	1	2	#NULL!	3	2000	1	3	1	1	0	1	1	1	0	1	0	1	1	1	1	0	0	#NULL!	0	#NULL!	0	#NULL!	0	#NULL!	1	5	1	2	0	0	0	0	1	1	1.82444	4	1	3
208	t1213	2	32	2	2	1	1	2	#NULL!	1	99999	1	1	0	1	0	1	1	1	0	1	1	0	1	1	1	1	1	5	1	1	0	#NULL!	0	#NULL!	1	5	1	2	1	0	0	0	1	1	3.34497	4	1	3
208	w2210	1	27	2	2	1	1	1	2	3	4000	1	3	1	1	1	0	1	1	1	0	1	0	1	0	1	1	0	#NULL!	0	#NULL!	0	#NULL!	0	#NULL!	0	#NULL!	0	#NULL!	0	0	0	0	0	0	-0.016846	3	1	3
209	s0209	1	16	1	2	2	1	2	#NULL!	3	6000	1	3	0	0	1	0	1	1	0	0	1	0	1	1	0	1	1	1	1	2	0	#NULL!	1	8	0	#NULL!	0	#NULL!	0	0	0	1	0	0	-0.665633	2	2	#NULL!
209	w2211	2	26	2	1	1	1	2	#NULL!	1	#NULL!	1	1	0	1	0	0	0	0	0	0	0	1	1	0	1	0	0	#NULL!	0	#NULL!	0	#NULL!	0	#NULL!	0	#NULL!	0	#NULL!	0	0	0	0	0	0	-3.57951	1	1	4
209	t1214	2	32	2	2	2	1	2	#NULL!	1	99999	1	1	0	1	0	1	1	0	0	0	1	0	1	1	0	1	0	#NULL!	0	#NULL!	0	#NULL!	1	7	1	2	0	#NULL!	0	0	0	1	0	0	0.675346	3	1	3
210	s0210	2	25	2	2	1	1	2	#NULL!	1	3500	1	1	0	0	0	1	0	0	0	0	1	0	1	0	0	1	1	3	1	4	1	2	1	2	1	1	1	1	1	1	0	0	0	0	4.36571	4	2	#NULL!
210	t1215	2	24	2	2	1	1	2	#NULL!	1	99999	1	1	0	1	0	1	1	1	0	1	1	1	1	1	1	1	0	#NULL!	0	#NULL!	0	#NULL!	1	2	1	6	1	1	0	0	0	0	1	0	3.22878	4	2	#NULL!
210	w2212	2	29	2	2	1	1	2	#NULL!	1	#NULL!	1	1	0	1	0	0	0	0	0	0	1	1	0	0	0	0	1	22	0	#NULL!	0	#NULL!	0	#NULL!	0	#NULL!	0	#NULL!	1	0	0	0	0	0	-2.15766	1	1	3
211	s0211	2	36	3	2	1	1	2	#NULL!	3	2850	1	3	0	0	0	0	0	1	0	0	1	1	1	1	1	1	1	2	1	3	0	#NULL!	1	1	1	3	1	1	0	1	0	0	0	0	2.21594	4	2	#NULL!
211	t1216	2	19	1	2	1	1	2	#NULL!	1	99999	1	1	0	0	0	0	1	0	0	1	1	0	1	0	0	1	1	2	0	#NULL!	0	#NULL!	1	2	1	2	1	1	0	0	0	0	0	0	-0.931767	2	2	#NULL!
211	w2209	2	26	2	2	1	1	1	1	2	#NULL!	1	2	0	1	0	0	0	0	0	0	0	0	1	0	0	1	0	#NULL!	0	#NULL!	0	#NULL!	0	#NULL!	0	#NULL!	0	#NULL!	0	0	0	0	0	0	-3.95079	1	1	4
212	w2213	1	22	2	2	2	3	1	3000	2	5000	4	2	0	1	1	0	1	1	1	0	1	0	1	0	0	0	0	#NULL!	0	#NULL!	0	#NULL!	0	#NULL!	0	#NULL!	0	#NULL!	0	0	0	0	0	0	-0.825654	2	1	4
212	s0212	2	27	2	2	2	1	2	#NULL!	1	4000	1	1	0	1	1	0	1	0	0	0	1	0	1	1	1	1	1	3	1	3	0	#NULL!	1	3	0	#NULL!	1	1	1	1	0	0	0	0	2.82211	4	1	3
212	t1217	2	20	2	2	2	1	2	#NULL!	1	8500	1	1	0	1	0	1	1	0	0	0	1	0	1	1	1	1	1	2	0	#NULL!	0	#NULL!	1	3	1	3	0	#NULL!	0	0	0	0	0	0	0.675346	3	1	4
213	s0213	2	35	2	2	1	1	2	#NULL!	3	3400	1	3	0	0	0	0	0	1	0	0	1	1	1	0	1	1	1	1	1	1	0	#NULL!	1	4	0	#NULL!	1	1	0	0	0	1	0	0	-0.986937	2	2	#NULL!
213	w2214	2	34	2	1	1	1	2	#NULL!	1	#NULL!	1	1	0	1	0	0	0	0	0	0	0	0	1	0	0	1	0	#NULL!	0	#NULL!	0	#NULL!	0	#NULL!	0	#NULL!	0	#NULL!	0	0	0	0	0	0	-3.95079	1	1	4
213	t1218	2	25	2	2	2	1	2	#NULL!	1	99999	1	1	0	0	0	1	1	0	0	0	1	0	1	0	0	1	0	#NULL!	0	#NULL!	0	#NULL!	1	1	1	2	1	1	0	0	0	0	0	0	-0.716923	2	1	3
214	s0214	2	25	2	2	2	1	2	#NULL!	1	3750	1	1	0	0	1	1	1	1	1	1	0	0	1	1	0	1	0	#NULL!	0	#NULL!	0	#NULL!	0	#NULL!	1	4	1	1	0	0	0	0	1	0	0.545744	3	1	3
214	t1219	2	19	1	2	2	1	2	#NULL!	1	3000	1	1	0	1	0	1	1	0	1	1	1	1	1	0	0	1	1	2	0	#NULL!	1	1	1	2	1	9	1	1	0	0	0	0	1	0	4.02035	4	1	4
214	w2215	1	28	2	2	1	2	2	#NULL!	2	6000	2	2	1	1	1	0	1	1	1	0	1	0	1	1	1	0	0	#NULL!	0	#NULL!	0	#NULL!	0	#NULL!	0	#NULL!	0	#NULL!	0	0	0	0	0	0	0.820309	3	1	3
215	w2216	1	25	2	2	2	1	2	#NULL!	2	3000	1	2	0	1	1	0	0	1	1	1	1	0	1	1	1	0	0	#NULL!	0	#NULL!	0	#NULL!	0	#NULL!	0	#NULL!	0	#NULL!	0	0	0	0	0	0	0.804445	3	1	3
215	t1220	2	28	2	2	2	1	2	#NULL!	1	99999	1	1	0	1	0	1	1	1	0	1	1	1	1	1	1	1	1	1	0	#NULL!	0	#NULL!	1	2	1	15	1	1	0	0	0	0	1	0	3.22878	4	2	#NULL!
215	s0215	2	25	2	2	1	1	2	#NULL!	1	99999	1	1	1	1	0	0	1	1	1	1	1	1	1	1	1	1	1	2	1	1	0	#NULL!	1	3	1	2	1	1	0	0	0	0	0	0	3.5393	4	1	4
216	w2217	2	22	2	2	4	1	1	3000	2	6000	1	2	0	1	0	0	1	0	0	0	1	0	1	1	0	1	0	#NULL!	0	#NULL!	0	#NULL!	0	#NULL!	1	3	1	7	0	0	0	0	0	1	-0.811503	2	1	4
216	s0216	2	24	2	2	1	1	2	#NULL!	1	99999	1	1	0	1	0	0	1	1	0	1	1	1	1	1	1	1	1	2	1	1	0	#NULL!	1	6	1	8	1	1	0	0	0	1	1	0	2.22099	4	1	4
216	t1221	2	30	2	2	1	1	2	#NULL!	1	99999	1	1	0	1	0	1	1	1	0	0	1	0	1	1	1	1	1	1	1	1	0	#NULL!	0	#NULL!	1	3	1	1	0	0	0	0	0	0	1.11714	3	1	4
217	s0217	2	26	2	2	1	1	2	#NULL!	1	99999	1	1	0	1	0	0	1	1	0	1	1	0	1	1	0	1	1	2	1	1	0	#NULL!	1	3	1	2	0	#NULL!	0	0	0	0	0	0	1.3882	3	1	3
217	t1222	2	23	2	2	1	1	2	#NULL!	1	99999	1	1	0	1	0	1	1	0	0	0	1	0	1	1	0	1	1	1	0	#NULL!	0	#NULL!	1	2	1	10	0	#NULL!	0	0	0	0	1	0	0.773772	3	1	3
217	w2218	1	30	2	2	1	1	2	#NULL!	3	2500	1	3	1	1	1	0	0	1	1	0	1	0	1	1	0	0	0	#NULL!	0	#NULL!	0	#NULL!	0	#NULL!	0	#NULL!	0	#NULL!	0	0	0	0	0	0	0.820309	3	1	3
218	s0218	2	36	3	2	1	1	2	#NULL!	1	99999	1	1	1	1	0	0	1	1	0	1	1	1	1	0	1	1	1	3	1	3	0	#NULL!	0	#NULL!	1	3	1	1	1	1	0	0	0	0	4.37937	4	1	3
218	t1223	2	25	2	2	2	1	2	#NULL!	1	99999	1	1	1	1	0	1	1	1	0	1	1	0	1	1	0	1	1	2	1	1	0	#NULL!	1	2	1	3	1	1	0	0	0	0	0	0	3.56788	4	1	4
218	w2219	2	28	2	1	1	1	2	#NULL!	1	#NULL!	1	1	1	1	0	0	1	0	0	0	0	0	1	0	0	1	0	#NULL!	0	#NULL!	0	#NULL!	0	#NULL!	0	#NULL!	0	#NULL!	0	0	0	0	0	0	-3.14199	1	1	3
219	s0219	2	33	2	2	1	1	2	#NULL!	1	99999	1	1	1	1	0	0	1	1	0	1	1	1	1	1	1	1	1	2	1	3	0	#NULL!	1	5	1	5	1	2	0	1	0	1	1	1	4.84117	4	1	3
219	t1224	2	32	2	2	2	1	2	#NULL!	1	99999	1	1	0	1	0	1	1	0	1	1	1	0	1	0	0	1	1	2	1	2	0	#NULL!	1	5	1	20	1	2	0	0	0	1	1	1	1.70742	4	1	3
219	w2220	1	26	2	2	1	1	2	#NULL!	3	3000	1	3	1	1	1	0	0	1	0	0	0	1	0	1	0	0	0	#NULL!	0	#NULL!	0	#NULL!	0	#NULL!	0	#NULL!	0	#NULL!	0	0	0	0	0	0	-2.0661	1	1	3
220	s0220	2	24	2	2	1	1	2	#NULL!	1	99999	1	1	1	1	0	0	1	1	0	1	1	0	1	1	0	1	1	3	1	1	0	#NULL!	1	3	1	5	1	1	1	0	0	0	1	0	3.98814	4	1	3
220	t1225	2	28	2	2	2	1	2	#NULL!	1	99999	1	1	0	0	0	1	1	1	0	1	1	0	1	1	0	1	0	#NULL!	0	#NULL!	0	#NULL!	0	#NULL!	1	4	1	1	0	0	0	0	1	0	1.0903	3	1	3
220	w2221	2	32	2	2	1	1	2	#NULL!	1	2000	1	1	0	1	0	0	0	0	0	0	0	0	1	0	0	1	0	#NULL!	0	#NULL!	0	#NULL!	0	#NULL!	0	#NULL!	0	#NULL!	0	0	0	0	0	0	-3.95079	1	1	4
221	t1226	2	26	2	2	2	1	2	#NULL!	1	2000	1	1	0	1	0	1	1	0	1	0	1	0	1	0	1	1	1	1	0	#NULL!	0	#NULL!	1	3	1	3	1	2	0	0	0	0	0	1	0.816047	3	1	3
221	w2222	1	28	2	2	4	3	2	#NULL!	2	6000	3	2	1	1	1	0	1	1	1	0	1	0	1	1	1	0	0	#NULL!	0	#NULL!	0	#NULL!	0	#NULL!	0	#NULL!	0	#NULL!	0	0	0	0	0	0	0.820309	3	1	3
221	s0221	2	29	2	2	1	1	2	#NULL!	1	99999	1	1	0	1	0	0	1	0	0	1	1	1	1	1	1	1	1	3	1	1	0	#NULL!	1	9	0	#NULL!	1	1	1	0	0	1	0	0	1.96329	4	1	3
222	s0222	2	34	2	2	1	1	2	#NULL!	1	99999	1	1	0	1	0	0	1	1	0	1	1	0	1	1	1	1	1	5	1	3	0	#NULL!	1	4	1	2	1	1	1	1	0	1	0	0	4.88543	4	1	3
222	t1227	2	25	2	2	2	1	2	#NULL!	1	99999	1	1	0	1	0	1	1	1	1	1	1	0	1	0	1	1	1	1	0	#NULL!	0	#NULL!	1	2	1	4	1	1	0	0	0	0	1	0	2.62827	4	1	3
222	w2223	2	32	2	2	1	1	2	#NULL!	1	#NULL!	1	1	0	1	0	0	0	0	0	0	0	0	0	0	1	1	0	#NULL!	0	#NULL!	0	#NULL!	0	#NULL!	1	15	0	#NULL!	0	0	0	0	1	0	-4.56993	1	1	3
223	s0223	2	28	2	2	1	1	2	#NULL!	1	99999	1	1	1	1	0	0	1	1	0	1	1	0	1	1	1	1	1	3	1	2	0	#NULL!	1	4	1	6	1	2	1	0	0	1	1	1	3.99498	4	1	4
223	t1228	2	36	3	2	3	3	1	2000	1	1000	4	1	0	0	1	1	1	1	1	1	1	0	1	1	1	1	0	#NULL!	1	1	0	#NULL!	1	4	1	8	1	2	0	0	0	1	1	1	2.77258	4	1	3
223	w2224	1	24	2	2	2	3	1	200	3	3000	4	3	1	1	1	0	1	1	1	0	1	0	1	1	1	0	0	#NULL!	0	#NULL!	0	#NULL!	0	#NULL!	0	#NULL!	0	#NULL!	0	0	0	0	0	0	0.820309	3	1	3
224	s0224	2	25	2	2	2	1	2	#NULL!	1	99999	1	1	0	1	0	0	1	1	1	0	1	0	1	1	0	1	1	5	1	3	0	#NULL!	1	4	1	1	1	1	1	1	0	1	0	0	4.70041	4	2	#NULL!
224	t1229	2	30	2	2	2	1	2	#NULL!	1	99999	1	1	0	1	0	1	1	0	1	1	1	0	1	0	0	1	1	2	1	3	0	#NULL!	1	6	1	7	1	1	0	1	0	1	1	0	3.50509	4	1	3
224	w2225	1	30	2	2	1	3	1	3500	3	4000	4	3	1	1	1	0	1	1	1	0	1	0	1	1	1	0	0	#NULL!	0	#NULL!	0	#NULL!	0	#NULL!	0	#NULL!	0	#NULL!	0	0	0	0	0	0	0.820309	3	1	4
225	s0225	2	22	2	2	2	1	2	#NULL!	1	99999	1	1	1	1	0	1	1	1	0	1	1	0	1	1	0	1	1	5	1	3	0	#NULL!	1	6	1	10	0	#NULL!	1	1	0	1	1	0	6.43736	4	2	#NULL!
225	t1230	2	38	3	2	1	1	2	#NULL!	1	99999	1	1	0	1	0	1	1	1	1	0	1	1	0	1	0	1	1	2	1	1	0	#NULL!	0	#NULL!	1	5	1	2	0	0	0	0	1	1	0.922845	3	1	3
225	w2226	1	30	2	2	4	3	1	707	3	6000	3	3	1	1	1	0	1	1	1	0	1	0	1	1	1	0	0	#NULL!	0	#NULL!	0	#NULL!	0	#NULL!	0	#NULL!	0	#NULL!	0	0	0	0	0	0	0.820309	3	1	3
226	s0226	2	30	2	2	1	1	2	#NULL!	1	99999	1	1	1	1	0	1	1	0	1	0	1	0	1	1	1	1	1	5	1	2	0	#NULL!	1	4	0	#NULL!	0	#NULL!	1	0	0	1	0	0	2.8605	4	2	#NULL!
226	t1231	2	25	2	2	2	1	2	#NULL!	1	99999	1	1	1	1	0	1	1	1	0	1	1	0	1	0	0	1	1	2	1	1	0	#NULL!	1	4	1	10	1	2	0	0	0	1	1	1	2.836	4	1	3
226	w2229	2	29	2	2	1	1	2	#NULL!	1	#NULL!	1	1	0	1	0	0	0	0	0	1	0	0	1	0	0	1	0	#NULL!	0	#NULL!	1	1	0	#NULL!	1	3	1	2	0	0	0	0	0	1	-0.278222	2	1	3
227	s0227	2	35	2	2	1	2	2	#NULL!	1	99999	2	1	0	0	0	0	0	1	1	1	1	0	1	0	1	1	1	6	1	4	0	#NULL!	1	4	1	5	1	2	1	1	0	1	1	1	3.84326	4	1	4
227	t1232	2	28	2	2	2	1	2	#NULL!	1	99999	1	1	1	1	0	1	1	1	0	1	1	0	1	1	1	1	1	3	1	3	0	#NULL!	1	3	1	2	1	1	1	1	0	0	0	0	6.70202	4	1	3
227	w2228	2	32	2	2	1	1	2	#NULL!	1	#NULL!	1	1	0	1	0	0	1	0	0	0	0	1	0	1	1	0	1	2	0	#NULL!	0	#NULL!	1	5	1	4	0	#NULL!	0	0	0	1	1	0	-2.5125	1	1	4
228	s0228	2	20	2	2	2	1	2	#NULL!	1	2000	1	1	0	0	0	0	0	1	0	1	1	0	1	1	0	1	1	4	0	#NULL!	1	8	1	3	1	2	1	1	1	0	1	0	0	0	8.16611	4	2	#NULL!
228	t1233	2	22	2	2	2	1	2	#NULL!	1	99999	1	1	0	1	0	1	1	0	0	0	1	0	0	0	0	1	1	1	1	1	0	#NULL!	1	1	1	6	1	2	0	0	0	0	1	1	-0.972218	2	1	3
228	w2229	2	29	2	2	1	1	2	#NULL!	1	#NULL!	1	1	0	1	0	0	0	0	0	0	0	0	1	1	0	1	1	2	1	1	0	#NULL!	0	#NULL!	1	3	0	#NULL!	0	0	0	0	0	0	-2.55244	1	1	4
229	s0229	2	26	2	2	1	3	1	4000	3	99999	4	3	1	1	0	1	1	1	1	1	0	1	1	1	1	1	1	3	1	2	0	#NULL!	1	5	1	4	1	1	1	0	0	1	1	0	4.60413	4	1	4
229	t1234	2	35	2	2	2	1	2	#NULL!	1	99999	1	1	0	1	0	1	1	1	1	1	1	0	1	0	0	1	1	2	0	#NULL!	0	#NULL!	1	3	0	#NULL!	1	1	0	0	0	0	0	0	1.96864	4	1	3
229	w2230	1	29	2	2	2	2	2	2	3	6000	2	3	1	1	1	0	1	1	1	1	1	0	1	1	0	0	0	#NULL!	0	#NULL!	0	#NULL!	0	#NULL!	0	#NULL!	0	#NULL!	0	0	0	0	0	0	1.61325	4	1	3
230	w2231	1	25	2	2	3	3	2	#NULL!	2	4500	4	2	1	1	1	1	1	1	0	0	0	0	0	0	0	0	0	#NULL!	0	#NULL!	0	#NULL!	0	#NULL!	0	#NULL!	0	#NULL!	0	0	0	0	0	0	-2.26675	1	1	3
230	t1235	1	20	2	2	2	1	2	#NULL!	1	3000	1	1	0	1	1	1	1	1	1	1	1	0	1	1	0	1	1	1	0	#NULL!	0	#NULL!	0	#NULL!	0	#NULL!	0	#NULL!	0	0	0	0	0	0	1.81223	4	2	#NULL!
230	s0230	2	30	2	2	1	1	2	#NULL!	3	99999	1	3	1	1	1	0	1	1	0	1	1	0	1	1	0	1	1	1	1	1	0	#NULL!	1	3	0	#NULL!	1	2	0	0	0	0	0	1	2.22425	4	1	3
231	t1236	2	20	2	2	3	1	2	#NULL!	1	99999	1	1	0	1	0	1	1	0	0	1	1	0	1	0	1	1	1	2	0	#NULL!	0	#NULL!	1	7	0	#NULL!	1	1	0	0	0	1	0	0	0.433021	3	2	#NULL!
231	w2232	1	30	2	2	3	1	2	#NULL!	2	5000	1	2	1	1	1	0	1	1	1	1	1	0	1	1	1	0	0	#NULL!	0	#NULL!	0	#NULL!	0	#NULL!	0	#NULL!	0	#NULL!	0	0	0	0	0	0	1.61325	4	1	3
231	s0231	2	31	2	2	1	1	2	#NULL!	3	99999	1	3	0	1	0	0	0	1	0	1	1	0	0	0	1	1	0	#NULL!	0	#NULL!	0	#NULL!	1	3	1	2	0	#NULL!	0	0	0	0	0	0	-0.727726	2	1	3
232	s0232	2	23	2	2	2	2	2	#NULL!	1	99999	2	1	0	0	0	1	0	0	0	1	1	0	1	0	0	1	1	1	0	#NULL!	0	#NULL!	1	3	1	4	1	1	0	0	0	0	1	0	0.174447	3	1	3
232	w2233	2	27	2	2	1	2	2	#NULL!	1	#NULL!	2	1	1	0	0	0	0	0	0	0	0	0	0	0	0	0	0	#NULL!	0	#NULL!	0	#NULL!	0	#NULL!	0	#NULL!	0	#NULL!	0	0	0	0	0	0	-5.33896	1	1	4
232	t1237	2	27	2	1	2	1	2	#NULL!	1	99999	1	1	0	1	1	0	1	1	1	0	1	1	1	0	0	1	0	#NULL!	0	#NULL!	0	#NULL!	1	2	1	5	0	#NULL!	0	0	0	0	1	0	1.05425	3	1	3
233	t1238	2	27	2	2	1	1	2	#NULL!	1	99999	1	1	1	1	1	0	1	0	1	1	0	1	1	0	1	1	1	2	0	#NULL!	0	#NULL!	1	1	1	2	1	1	0	0	0	0	0	0	0.621967	3	2	#NULL!
233	s0233	2	25	2	2	1	1	2	#NULL!	1	99999	1	1	1	1	0	1	1	0	0	0	1	0	1	0	0	1	1	3	1	4	0	#NULL!	1	2	1	3	1	1	1	1	0	0	0	0	4.14423	4	1	3
233	w2234	2	29	2	2	1	1	2	#NULL!	1	#NULL!	1	1	1	0	0	0	0	0	0	0	0	0	0	1	1	0	1	2	1	1	0	#NULL!	1	1	1	1	1	1	0	0	0	0	0	0	-2.72852	1	1	3
234	w2235	1	28	2	2	2	1	2	#NULL!	3	5000	1	3	1	1	1	0	0	1	1	1	1	1	1	0	0	0	0	#NULL!	0	#NULL!	0	#NULL!	0	#NULL!	0	#NULL!	0	#NULL!	0	0	0	0	0	0	1.14738	3	1	3
234	s0234	2	30	2	2	1	1	2	#NULL!	1	99999	1	1	0	0	0	1	1	0	0	0	1	0	1	0	0	1	1	5	1	2	0	#NULL!	0	#NULL!	0	#NULL!	0	#NULL!	1	0	0	0	0	0	-1.16058	2	1	3
234	t1239	2	27	2	1	1	1	2	#NULL!	1	99999	1	1	0	1	1	1	0	0	0	1	1	1	1	0	0	1	0	#NULL!	0	#NULL!	0	#NULL!	0	#NULL!	1	16	1	1	0	0	0	0	1	0	0.833459	3	1	3
235	s0235	2	25	2	2	1	1	2	#NULL!	1	99999	1	1	0	1	0	1	1	0	1	0	1	0	1	0	0	1	1	5	1	2	0	#NULL!	1	3	1	4	1	2	1	0	0	0	1	1	2.2441	4	1	3
235	t1240	2	35	2	2	1	1	2	#NULL!	1	99999	1	1	1	1	1	1	1	1	1	1	0	1	1	0	1	1	1	2	0	#NULL!	0	#NULL!	1	4	1	3	1	1	0	0	0	1	0	0	2.55745	4	1	3
235	w2236	2	27	2	2	1	2	2	#NULL!	3	2000	2	3	0	1	1	0	0	1	1	0	1	0	1	1	0	0	0	#NULL!	0	#NULL!	0	#NULL!	0	#NULL!	0	#NULL!	0	#NULL!	0	0	0	0	0	0	0.0115	3	1	4
236	s0236	1	28	2	2	1	1	2	#NULL!	1	99999	1	1	0	0	0	1	0	0	0	1	1	0	1	1	0	1	0	#NULL!	1	2	0	#NULL!	1	2	0	#NULL!	1	1	0	0	0	0	0	0	0.351974	3	2	#NULL!
236	t1241	2	26	2	2	2	1	2	#NULL!	1	99999	1	1	1	1	0	0	1	1	1	1	0	1	0	0	1	1	1	1	1	1	0	#NULL!	0	#NULL!	1	3	1	1	0	0	0	0	0	0	-0.796618	2	1	3
236	w2237	2	26	2	2	1	2	2	#NULL!	1	#NULL!	2	1	0	1	0	0	0	0	0	0	0	1	0	0	1	1	1	1	1	1	0	#NULL!	0	#NULL!	1	3	0	#NULL!	0	0	0	0	0	0	-4.29708	1	1	3
237	s0237	2	34	2	2	1	1	2	#NULL!	1	99999	1	1	1	1	1	0	0	1	1	1	1	0	1	1	0	1	1	5	1	2	0	#NULL!	1	6	1	4	1	2	1	0	0	1	1	1	4.82143	4	2	#NULL!
237	t1242	2	35	2	2	1	1	2	#NULL!	1	99999	1	1	0	1	0	0	1	0	1	0	0	1	1	1	0	1	1	2	0	#NULL!	1	2	1	7	1	1	1	1	0	0	0	1	0	0	1.58734	3	2	#NULL!
237	w2238	2	26	2	1	1	2	2	#NULL!	1	#NULL!	2	1	0	1	0	0	0	0	0	0	0	1	0	1	1	0	0	#NULL!	0	#NULL!	0	#NULL!	0	#NULL!	0	#NULL!	0	#NULL!	0	0	0	0	0	0	-4.02112	1	1	3
238	t1243	2	20	2	2	2	1	2	#NULL!	1	99999	1	1	1	1	0	1	1	1	1	1	1	0	1	0	0	1	1	2	1	1	0	#NULL!	1	5	1	4	1	2	0	0	0	1	1	1	3.44392	4	2	#NULL!
238	s0238	2	30	2	2	1	1	2	#NULL!	3	99999	1	3	0	0	0	0	0	1	0	0	1	1	1	0	1	1	1	2	0	#NULL!	0	#NULL!	1	5	1	2	1	1	0	0	0	1	0	0	-0.425734	2	1	3
238	w2239	2	27	2	1	2	1	2	#NULL!	2	6000	1	2	1	1	1	0	1	1	1	1	1	0	1	1	1	0	0	#NULL!	0	#NULL!	0	#NULL!	0	#NULL!	0	#NULL!	0	#NULL!	0	0	0	0	0	0	1.61325	4	1	3
239	s0239	2	21	2	2	1	1	2	#NULL!	3	99999	1	3	1	1	1	0	1	1	1	1	1	1	1	1	1	1	1	2	1	1	0	#NULL!	0	#NULL!	0	#NULL!	1	1	0	0	0	0	0	0	2.34762	4	2	#NULL!
239	t1244	2	16	1	2	2	1	2	#NULL!	1	99999	1	1	0	1	0	1	1	1	0	1	1	1	1	1	0	1	1	2	1	1	0	#NULL!	0	#NULL!	0	#NULL!	1	2	0	0	0	0	0	1	1.727	4	2	#NULL!
239	w2240	2	30	2	2	1	1	2	#NULL!	1	#NULL!	1	1	0	0	0	0	0	0	0	0	0	0	0	0	0	0	0	#NULL!	0	#NULL!	0	#NULL!	0	#NULL!	0	#NULL!	0	#NULL!	0	0	0	0	0	0	-6.14776	1	1	4
240	s0240	2	33	2	2	1	1	2	#NULL!	1	99999	1	1	1	1	0	0	1	1	0	1	1	1	1	1	1	1	1	2	1	1	0	#NULL!	0	#NULL!	1	4	1	2	0	0	0	0	1	1	2.18765	4	1	4
240	t1245	2	27	2	2	3	1	2	#NULL!	3	1000	1	3	0	1	0	1	1	0	0	1	1	0	1	1	0	1	0	#NULL!	0	#NULL!	0	#NULL!	1	6	1	5	1	1	0	0	0	1	1	0	1.9298	4	1	4
240	w2241	1	29	2	2	4	3	1	3500	1	2500	3	1	1	1	1	0	1	1	1	1	1	1	0	1	1	1	1	12	0	#NULL!	0	#NULL!	0	#NULL!	0	#NULL!	0	#NULL!	1	0	0	0	0	0	2.03539	4	1	4
241	s0241	2	33	2	2	1	1	2	#NULL!	1	99999	1	1	1	1	0	0	1	1	0	1	1	1	1	1	1	1	1	3	1	2	0	#NULL!	1	7	1	3	1	2	1	0	0	1	0	1	4.26784	4	1	4
241	w2242	2	30	2	2	2	1	2	#NULL!	2	#NULL!	1	2	1	1	0	0	0	0	0	0	0	1	0	0	1	1	1	2	1	2	0	#NULL!	0	#NULL!	0	#NULL!	0	#NULL!	0	0	0	0	0	0	-4.04947	1	1	1
241	t1246	2	28	2	2	1	1	2	#NULL!	1	99999	1	1	1	1	0	1	1	1	0	0	1	0	1	1	0	1	1	2	1	1	0	#NULL!	1	3	1	5	1	2	0	0	0	0	1	1	2.88021	4	1	3
242	s0242	2	25	2	2	1	1	2	#NULL!	1	99999	1	1	1	1	0	0	1	1	0	1	1	1	1	1	1	1	1	3	1	1	0	#NULL!	1	3	1	4	1	1	1	0	0	0	1	0	4.35942	4	1	4
242	t1247	2	35	2	2	1	1	2	#NULL!	1	99999	1	1	0	1	1	1	1	1	1	1	1	1	1	0	1	1	1	2	1	2	1	1	1	14	1	3	1	4	0	0	0	1	0	1	5.07498	4	1	4
242	w2243	1	27	2	2	4	3	1	3500	3	6100	3	3	1	1	1	0	1	1	1	1	1	0	1	1	1	0	0	#NULL!	0	#NULL!	0	#NULL!	0	#NULL!	0	#NULL!	0	#NULL!	0	0	0	0	0	0	1.61325	4	1	3
243	t1248	1	20	2	2	2	1	2	#NULL!	1	99999	1	1	0	0	1	1	1	1	1	1	1	0	1	0	1	1	0	#NULL!	0	#NULL!	0	#NULL!	0	#NULL!	0	#NULL!	0	#NULL!	0	0	0	0	0	0	0.056875	3	1	4
243	s0243	2	30	2	2	2	1	2	#NULL!	1	99999	1	1	1	1	0	0	1	0	1	1	1	1	1	1	1	1	1	2	1	2	0	#NULL!	1	2	1	2	1	1	0	0	0	0	0	0	2.6116	4	1	4
243	w2280	1	26	2	2	2	3	2	#NULL!	3	3000	4	3	1	1	1	0	1	1	1	1	1	0	1	0	0	0	0	#NULL!	0	#NULL!	0	#NULL!	0	#NULL!	0	#NULL!	0	#NULL!	0	0	0	0	0	0	0.776098	3	1	4
244	t1249	2	45	3	2	1	3	2	#NULL!	1	99999	4	1	0	0	0	1	1	0	0	0	1	0	1	1	1	1	1	1	1	1	1	1	0	#NULL!	0	#NULL!	0	#NULL!	0	0	0	0	0	0	0.295442	3	2	#NULL!
244	s0244	2	25	2	2	1	1	2	#NULL!	1	4600	1	1	0	1	0	0	1	0	0	1	1	0	1	1	0	1	1	2	1	4	0	#NULL!	1	3	1	5	1	2	0	1	0	0	1	1	2.73338	4	1	3
244	w2281	1	25	2	2	2	1	2	#NULL!	3	4000	1	3	1	1	1	0	1	1	1	0	1	0	1	0	0	0	0	#NULL!	0	#NULL!	0	#NULL!	0	#NULL!	0	#NULL!	0	#NULL!	0	0	0	0	0	0	-0.016846	3	1	3
245	s0245	2	24	2	2	2	1	2	#NULL!	3	4500	1	3	0	0	0	0	0	0	1	0	0	1	0	1	0	1	1	22	0	#NULL!	0	#NULL!	0	#NULL!	0	#NULL!	0	#NULL!	1	0	0	0	0	0	-3.00178	1	2	#NULL!
245	t1250	2	30	2	2	1	1	2	#NULL!	1	99999	1	1	0	0	1	0	1	1	0	0	1	0	1	0	0	1	1	2	0	#NULL!	0	#NULL!	0	#NULL!	0	#NULL!	1	1	0	0	0	0	0	0	-1.98869	1	1	3
245	w2285	1	28	2	2	2	1	1	#NULL!	1	7	1	1	1	1	1	0	1	1	0	1	1	0	1	0	1	0	0	#NULL!	0	#NULL!	0	#NULL!	0	#NULL!	0	#NULL!	0	#NULL!	0	0	0	0	0	0	0.168174	3	1	3
246	s0246	2	30	2	1	2	1	2	#NULL!	1	37502	1	1	0	0	1	1	1	0	1	0	0	1	1	1	1	1	1	3	0	#NULL!	0	#NULL!	1	2	1	3	1	1	1	0	0	0	0	0	1.27658	3	1	4
246	w2283	1	28	2	2	2	3	2	#NULL!	3	1000	4	3	1	1	1	0	0	1	1	1	1	0	1	0	0	0	0	#NULL!	0	#NULL!	0	#NULL!	0	#NULL!	0	#NULL!	0	#NULL!	0	0	0	0	0	0	0.776098	3	1	3
247	w2284	1	28	2	2	2	1	2	#NULL!	3	#NULL!	1	3	1	1	1	1	1	1	1	1	1	1	1	1	#NULL!	0	0	#NULL!	0	#NULL!	0	#NULL!	0	#NULL!	0	#NULL!	0	#NULL!	0	0	0	0	0	0	2.99232	4	1	3
247	s0247	2	28	2	2	1	1	2	#NULL!	1	10500	1	1	1	1	0	0	1	1	0	1	0	1	1	1	0	1	1	2	1	3	0	#NULL!	1	1	1	2	1	1	0	1	0	0	0	0	3.36489	4	2	#NULL!
248	s0248	2	22	2	2	2	1	2	#NULL!	1	2500	1	1	0	1	1	0	1	1	1	1	1	0	1	0	0	1	1	5	0	#NULL!	0	#NULL!	1	4	1	3	1	2	1	0	0	1	0	1	3.07704	4	2	#NULL!
248	w2285	1	30	2	2	1	2	2	#NULL!	3	#NULL!	2	3	1	1	1	0	0	1	1	1	0	0	1	0	0	0	0	#NULL!	0	#NULL!	0	#NULL!	0	#NULL!	0	#NULL!	0	#NULL!	0	0	0	0	0	0	-0.594905	2	1	3
249	s0249	2	20	2	2	2	1	2	#NULL!	1	2500	1	1	0	1	0	0	0	0	0	0	0	0	1	1	0	1	1	6	1	4	1	2	1	5	1	1	1	1	1	1	0	1	0	0	3.74228	4	2	#NULL!
249	w2286	2	30	2	2	1	2	2	#NULL!	2	1000	2	2	0	1	1	0	0	0	0	1	0	1	0	1	1	0	0	#NULL!	0	#NULL!	0	#NULL!	0	#NULL!	0	#NULL!	0	#NULL!	0	0	0	0	0	0	-3.00966	1	1	3
250	w2287	1	23	2	2	3	1	2	#NULL!	2	4000	1	2	1	1	1	0	1	1	1	1	1	0	1	0	1	0	0	#NULL!	0	#NULL!	0	#NULL!	0	#NULL!	0	#NULL!	0	#NULL!	0	0	0	0	0	0	0.776098	3	1	3
250	s0250	2	38	3	2	1	1	2	#NULL!	3	3000	1	3	0	0	0	0	0	1	0	0	1	1	1	0	1	1	1	1	0	#NULL!	0	#NULL!	0	#NULL!	0	#NULL!	0	#NULL!	0	0	0	0	0	0	-2.19902	1	1	3
251	w2288	1	30	2	2	2	3	2	#NULL!	3	4000	4	3	1	1	1	0	1	1	0	1	1	1	0	0	0	0	0	#NULL!	0	#NULL!	0	#NULL!	0	#NULL!	0	#NULL!	0	#NULL!	0	0	0	0	0	0	-0.73931	2	1	3
252	w2289	1	20	2	2	3	1	2	#NULL!	3	10000	1	3	1	1	0	0	1	1	1	1	0	0	1	0	0	0	0	#NULL!	0	#NULL!	0	#NULL!	0	#NULL!	0	#NULL!	0	#NULL!	0	0	0	0	0	0	-0.813424	2	1	3
253	w2290	2	30	2	2	1	3	2	#NULL!	3	5000	4	3	1	1	1	0	0	1	0	0	1	0	1	1	0	0	0	#NULL!	0	#NULL!	0	#NULL!	0	#NULL!	0	#NULL!	0	#NULL!	0	0	0	0	0	0	0.212385	3	1	3
254	w2291	1	25	2	2	2	3	2	#NULL!	3	6000	4	3	1	1	1	0	1	1	1	1	0	0	0	1	0	0	0	#NULL!	0	#NULL!	0	#NULL!	0	#NULL!	0	#NULL!	0	#NULL!	0	0	0	0	0	0	-1.03652	2	1	3
255	w2292	1	22	2	2	2	2	2	#NULL!	2	#NULL!	2	2	0	0	0	0	0	0	0	0	0	0	0	1	0	0	1	22	0	#NULL!	0	#NULL!	0	#NULL!	0	#NULL!	0	#NULL!	1	0	0	0	0	0	-3.98099	1	1	4
256	w2293	1	30	2	2	2	1	2	#NULL!	2	6000	1	2	1	1	0	0	1	1	0	0	1	0	1	0	0	0	0	#NULL!	0	#NULL!	0	#NULL!	0	#NULL!	0	#NULL!	0	#NULL!	0	0	0	0	0	0	-0.84329	2	1	3
257	w2294	2	27	2	2	3	3	2	#NULL!	1	#NULL!	3	1	1	1	0	0	1	1	0	1	0	0	1	1	1	1	0	#NULL!	0	#NULL!	0	#NULL!	0	#NULL!	0	#NULL!	0	#NULL!	0	0	0	0	0	0	-0.584193	2	1	4
258	w2295	1	35	2	2	2	1	2	#NULL!	3	10000	1	3	1	1	0	0	1	1	0	1	1	0	1	0	1	0	0	#NULL!	0	#NULL!	0	#NULL!	0	#NULL!	0	#NULL!	0	#NULL!	0	0	0	0	0	0	-0.050346	3	2	#NULL!
259	w2296	1	30	2	2	2	3	2	#NULL!	3	4000	4	3	1	1	0	0	1	1	0	1	1	0	1	0	0	0	0	#NULL!	0	#NULL!	0	#NULL!	0	#NULL!	0	#NULL!	0	#NULL!	0	0	0	0	0	0	-0.050346	3	2	#NULL!
260	w2297	1	25	2	2	2	2	2	#NULL!	2	4000	2	2	1	1	0	0	1	1	0	0	1	0	1	0	0	1	0	#NULL!	0	#NULL!	0	#NULL!	0	#NULL!	0	#NULL!	0	#NULL!	0	0	0	0	0	0	-0.84329	2	1	3
261	w2298	1	25	2	2	2	2	2	#NULL!	3	3000	2	3	1	1	1	0	1	1	1	1	1	1	0	1	0	0	0	#NULL!	0	#NULL!	0	#NULL!	0	#NULL!	0	#NULL!	0	#NULL!	0	0	0	0	0	0	0.705769	3	1	3
262	w2299	1	27	2	2	3	2	2	#NULL!	3	6000	2	3	1	1	1	1	1	0	0	1	0	1	0	0	0	0	0	#NULL!	0	#NULL!	0	#NULL!	0	#NULL!	0	#NULL!	0	#NULL!	0	0	0	0	0	0	-2.03022	1	1	3
263	w2244	2	30	2	2	2	2	2	#NULL!	1	#NULL!	2	1	0	1	0	0	0	0	0	0	0	0	1	0	0	1	0	#NULL!	0	#NULL!	0	#NULL!	0	#NULL!	0	#NULL!	0	#NULL!	0	0	0	0	0	0	-3.95079	1	1	3
264	w2245	1	25	2	2	1	2	2	#NULL!	3	1700	2	2	0	1	1	0	0	1	1	1	1	0	1	0	0	0	0	#NULL!	0	#NULL!	0	#NULL!	0	#NULL!	0	#NULL!	0	#NULL!	0	0	0	0	0	0	-0.03271	3	1	4
265	w2246	1	30	2	2	2	3	2	#NULL!	2	4000	3	2	1	1	1	0	1	1	1	1	0	1	1	1	0	0	0	#NULL!	0	#NULL!	0	#NULL!	0	#NULL!	0	#NULL!	0	#NULL!	0	0	0	0	0	0	0.613533	3	1	4
266	w2247	1	30	2	2	2	2	2	#NULL!	2	6000	2	2	1	1	1	0	0	1	1	1	1	0	0	0	0	0	0	#NULL!	0	#NULL!	0	#NULL!	0	#NULL!	0	#NULL!	0	#NULL!	0	0	0	0	0	0	-0.502669	2	1	1
267	w2248	2	30	2	2	1	3	2	#NULL!	2	#NULL!	3	2	0	0	0	0	0	0	1	1	0	1	0	0	0	0	0	#NULL!	0	#NULL!	0	#NULL!	0	#NULL!	0	#NULL!	0	#NULL!	0	0	0	0	0	0	-4.37561	1	1	3
268	w2249	1	28	2	2	2	1	2	#NULL!	3	3500	1	3	1	1	1	1	1	1	1	1	1	1	1	1	1	1	1	22	0	#NULL!	0	#NULL!	0	#NULL!	0	#NULL!	0	#NULL!	1	0	0	0	0	0	4.32195	4	1	4
269	w2250	1	25	2	2	2	1	2	#NULL!	2	1500	1	2	0	1	1	0	0	1	1	0	1	0	1	1	0	0	0	#NULL!	0	#NULL!	0	#NULL!	0	#NULL!	0	#NULL!	0	#NULL!	0	0	0	0	0	0	0.0115	3	1	4
270	w3333	1	25	2	2	1	2	2	#NULL!	1	#NULL!	2	1	0	0	0	0	1	1	0	1	1	0	1	1	1	1	0	#NULL!	0	#NULL!	0	#NULL!	0	#NULL!	0	#NULL!	0	#NULL!	0	0	0	0	0	0	-0.940201	2	1	3
271	w3340	2	25	2	1	1	2	2	#NULL!	1	#NULL!	2	1	0	0	0	0	0	0	0	0	0	0	1	1	0	0	0	#NULL!	0	#NULL!	0	#NULL!	0	#NULL!	0	#NULL!	0	#NULL!	0	0	0	0	0	0	-4.03184	1	1	3
272	w3339	1	25	2	2	1	1	2	#NULL!	1	#NULL!	1	1	1	1	0	0	0	1	1	0	0	0	0	0	1	1	0	#NULL!	0	#NULL!	0	#NULL!	0	#NULL!	0	#NULL!	0	#NULL!	0	0	0	0	0	0	-2.88514	1	1	4
273	w3338	1	18	1	2	3	1	2	#NULL!	3	40000	1	2	0	0	0	1	1	1	1	1	0	1	1	1	1	1	0	#NULL!	0	#NULL!	0	#NULL!	0	#NULL!	0	#NULL!	0	#NULL!	0	0	0	0	0	0	-0.324209	2	2	#NULL!
274	w3337	2	30	2	2	1	2	2	#NULL!	1	#NULL!	2	1	0	0	0	0	1	0	1	0	1	1	0	1	1	1	1	4	0	#NULL!	1	11	1	1	1	2	0	#NULL!	1	0	1	0	0	0	5.78283	4	1	3
275	w3336	2	20	2	1	3	1	2	#NULL!	1	#NULL!	1	1	0	1	0	0	1	0	1	1	0	1	0	1	0	0	0	#NULL!	0	#NULL!	0	#NULL!	0	#NULL!	0	#NULL!	0	#NULL!	0	0	0	0	0	0	-2.62026	1	1	4
276	w3335	1	26	2	2	3	1	2	#NULL!	3	#NULL!	1	2	0	0	0	0	1	1	1	1	1	0	1	1	1	0	0	#NULL!	0	#NULL!	0	#NULL!	0	#NULL!	0	#NULL!	0	#NULL!	0	0	0	0	0	0	-0.332277	2	1	3
277	w3334	1	25	2	1	1	2	2	#NULL!	1	#NULL!	2	1	0	0	0	1	1	0	0	1	0	1	0	1	0	0	0	#NULL!	0	#NULL!	0	#NULL!	0	#NULL!	0	#NULL!	0	#NULL!	0	0	0	0	0	0	-3.1386	1	1	3
278	w3303	2	35	2	1	1	2	2	#NULL!	1	#NULL!	2	1	0	1	0	1	0	0	0	0	1	0	1	0	0	0	1	1	1	1	1	1	0	#NULL!	0	#NULL!	0	#NULL!	0	0	0	0	0	0	0.376489	3	1	3
279	w3302	1	25	2	2	3	1	2	#NULL!	2	#NULL!	1	2	0	0	0	0	0	1	1	1	0	1	1	1	1	0	0	#NULL!	0	#NULL!	0	#NULL!	0	#NULL!	0	#NULL!	0	#NULL!	0	0	0	0	0	0	-1.332	2	2	#NULL!
280	w3301	1	26	2	2	3	1	2	#NULL!	2	#NULL!	1	2	0	0	1	1	1	1	1	1	1	1	1	1	1	0	0	#NULL!	0	#NULL!	0	#NULL!	0	#NULL!	0	#NULL!	0	#NULL!	0	0	0	0	0	0	1.26531	3	1	4
281	w3300	1	25	2	1	1	2	2	#NULL!	3	#NULL!	2	3	0	0	1	0	1	1	1	1	0	1	1	1	0	1	0	#NULL!	0	#NULL!	0	#NULL!	0	#NULL!	0	#NULL!	0	#NULL!	0	0	0	0	0	0	-1.11348	2	1	3
282	w3349	1	25	2	2	1	1	2	#NULL!	1	#NULL!	1	1	0	0	1	0	1	1	1	0	1	0	1	1	1	0	1	1	0	#NULL!	0	#NULL!	0	#NULL!	0	#NULL!	0	#NULL!	0	0	0	0	0	0	-0.906702	2	1	3
283	w3348	2	27	2	2	1	2	2	#NULL!	1	#NULL!	2	1	0	0	1	0	1	1	1	0	1	1	1	1	1	0	0	#NULL!	0	#NULL!	0	#NULL!	0	#NULL!	0	#NULL!	0	#NULL!	0	0	0	0	0	0	-0.535419	2	2	#NULL!
284	w3347	2	26	2	2	1	1	2	#NULL!	1	#NULL!	1	1	1	0	0	0	0	1	1	1	1	0	1	0	1	0	0	#NULL!	0	#NULL!	0	#NULL!	0	#NULL!	0	#NULL!	0	#NULL!	0	0	0	0	0	0	-0.360624	2	1	3
285	w3346	2	26	2	2	2	3	2	#NULL!	1	#NULL!	3	1	0	0	0	0	1	0	0	0	0	0	1	1	1	1	0	#NULL!	0	#NULL!	0	#NULL!	0	#NULL!	0	#NULL!	0	#NULL!	0	0	0	0	0	0	-4.03184	1	1	3
286	w3345	2	25	2	2	1	1	2	#NULL!	1	#NULL!	1	1	0	0	0	1	0	0	1	0	0	1	1	1	0	1	0	#NULL!	0	#NULL!	0	#NULL!	0	#NULL!	0	#NULL!	0	#NULL!	0	0	0	0	0	0	-2.04485	1	1	3
287	w3344	2	24	2	2	2	2	2	#NULL!	2	#NULL!	2	2	1	0	1	0	0	0	0	0	0	0	0	0	0	0	0	#NULL!	0	#NULL!	0	#NULL!	0	#NULL!	0	#NULL!	0	#NULL!	0	0	0	0	0	0	-5.12044	1	1	3
288	w3343	2	35	2	2	1	1	2	#NULL!	2	#NULL!	1	2	0	1	0	0	0	1	0	0	0	0	0	0	1	1	0	#NULL!	0	#NULL!	0	#NULL!	0	#NULL!	0	#NULL!	0	#NULL!	0	0	0	0	0	0	-4.30187	1	1	3
289	w3342	1	35	2	1	1	2	2	#NULL!	2	#NULL!	2	2	0	1	0	1	0	1	1	1	1	1	0	1	1	1	0	#NULL!	0	#NULL!	0	#NULL!	0	#NULL!	0	#NULL!	0	#NULL!	0	0	0	0	0	0	0.686229	3	1	4
290	w3341	2	25	2	2	2	1	2	#NULL!	1	#NULL!	1	1	0	0	1	0	0	0	1	1	1	1	1	1	1	0	0	#NULL!	1	2	1	2	0	#NULL!	1	2	1	5	0	0	0	0	0	1	2.20946	4	2	#NULL!
291	w2273	1	23	2	2	2	3	2	#NULL!	2	3300	3	2	1	1	1	1	1	1	1	1	1	1	1	0	1	1	0	#NULL!	0	#NULL!	0	#NULL!	0	#NULL!	0	#NULL!	0	#NULL!	0	0	0	0	0	0	2.15517	4	1	3
292	w2274	1	25	2	2	1	1	2	#NULL!	3	1500	1	3	1	1	1	0	1	1	1	0	1	0	1	0	0	0	0	#NULL!	0	#NULL!	0	#NULL!	0	#NULL!	0	#NULL!	0	#NULL!	0	0	0	0	0	0	-0.016846	3	2	#NULL!
293	w2275	1	23	2	2	2	1	2	#NULL!	1	#NULL!	1	1	1	1	1	0	0	1	0	0	0	0	1	0	0	1	0	#NULL!	0	#NULL!	0	#NULL!	0	#NULL!	0	#NULL!	0	#NULL!	0	0	0	0	0	0	-1.99577	1	1	3
294	w2276	2	30	2	2	1	2	2	#NULL!	2	#NULL!	2	2	0	1	0	0	0	0	0	0	1	0	1	1	0	0	0	#NULL!	0	#NULL!	0	#NULL!	0	#NULL!	0	#NULL!	0	#NULL!	0	0	0	0	0	0	-1.74264	1	1	3
295	w2277	1	30	2	2	1	3	1	500	3	4500	4	3	1	1	1	0	0	1	1	1	1	0	1	1	0	0	0	#NULL!	0	#NULL!	0	#NULL!	0	#NULL!	0	#NULL!	0	#NULL!	0	0	0	0	0	0	1.61325	4	1	3
296	w2278	2	20	2	2	2	3	1	1000	3	#NULL!	4	3	1	1	0	0	1	0	0	0	0	0	1	1	1	1	1	2	1	1	0	#NULL!	1	1	1	1	0	#NULL!	0	0	0	0	0	0	-0.894637	2	1	1
297	w2279	2	28	2	2	2	1	2	#NULL!	3	5000	1	3	1	1	0	0	1	1	0	1	0	0	1	1	0	1	0	#NULL!	0	#NULL!	0	#NULL!	0	#NULL!	0	#NULL!	0	#NULL!	0	0	0	0	0	0	-0.584193	2	1	3
298	w3312	1	22	2	2	1	1	2	#NULL!	3	#NULL!	1	2	0	0	0	0	0	0	0	0	1	1	1	1	0	0	0	#NULL!	0	#NULL!	0	#NULL!	0	#NULL!	0	#NULL!	0	#NULL!	0	0	0	0	0	0	-2.28956	1	2	#NULL!
299	w3311	1	28	2	2	4	1	1	5200	2	7600	1	2	0	0	0	0	1	0	1	0	1	1	1	1	0	1	0	#NULL!	0	#NULL!	0	#NULL!	0	#NULL!	0	#NULL!	0	#NULL!	0	0	0	0	0	0	-1.68163	2	2	#NULL!
300	w3310	1	25	2	2	4	2	2	#NULL!	2	#NULL!	2	2	0	0	1	0	1	1	1	0	0	1	0	1	0	0	0	#NULL!	0	#NULL!	0	#NULL!	0	#NULL!	0	#NULL!	0	#NULL!	0	0	0	0	0	0	-3.18519	1	1	3
301	w3309	2	23	2	2	2	2	2	#NULL!	1	#NULL!	2	1	0	0	0	0	0	0	0	0	0	0	0	1	1	1	0	#NULL!	0	#NULL!	0	#NULL!	0	#NULL!	0	#NULL!	0	#NULL!	0	0	0	0	0	0	-5.31061	1	1	3
302	w3308	1	26	2	2	3	1	2	#NULL!	2	#NULL!	1	2	0	0	0	0	1	0	0	0	1	0	1	0	0	1	0	#NULL!	0	#NULL!	0	#NULL!	0	#NULL!	0	#NULL!	0	#NULL!	0	0	0	0	0	0	-3.49799	1	1	3
303	w3307	1	27	2	2	1	2	2	#NULL!	1	#NULL!	2	1	0	0	1	0	1	1	1	1	1	1	0	1	0	1	0	#NULL!	0	#NULL!	0	#NULL!	0	#NULL!	0	#NULL!	0	#NULL!	0	0	0	0	0	0	-1.02124	2	1	3
304	w3306	1	25	2	2	2	1	2	#NULL!	3	#NULL!	1	2	0	0	0	0	1	1	1	0	1	0	1	0	1	0	0	#NULL!	0	#NULL!	0	#NULL!	0	#NULL!	0	#NULL!	0	#NULL!	0	0	0	0	0	0	-1.96238	1	1	3
305	w3305	2	26	2	2	1	1	2	#NULL!	1	#NULL!	1	1	0	0	0	0	0	0	0	0	1	0	1	0	1	1	1	22	0	#NULL!	0	#NULL!	0	#NULL!	0	#NULL!	0	#NULL!	1	0	0	0	0	0	-2.16837	1	1	3
306	w3304	1	28	2	2	2	1	2	#NULL!	2	5000	1	2	0	0	1	0	1	1	1	1	1	1	0	1	1	1	0	#NULL!	0	#NULL!	0	#NULL!	0	#NULL!	0	#NULL!	0	#NULL!	0	0	0	0	0	0	-1.02124	2	1	3
307	w2225	1	23	2	1	1	2	2	#NULL!	1	#NULL!	2	1	0	0	0	0	0	0	0	0	0	0	0	0	0	1	0	#NULL!	0	#NULL!	1	22	0	#NULL!	0	#NULL!	0	#NULL!	0	0	1	0	0	0	-0.144354	3	1	3
308	w2252	1	26	2	2	3	1	2	#NULL!	3	4000	1	3	1	1	1	0	1	1	1	1	1	1	1	0	1	1	0	#NULL!	0	#NULL!	0	#NULL!	0	#NULL!	0	#NULL!	0	#NULL!	0	0	0	0	0	0	1.14738	3	1	4
309	w2253	2	26	2	2	1	2	2	#NULL!	1	#NULL!	2	1	0	0	0	0	0	0	0	0	0	0	0	0	0	0	1	2	1	1	0	#NULL!	1	4	0	#NULL!	1	1	0	0	0	1	0	0	-4.93568	1	1	3
310	w2254	1	30	2	2	1	1	2	#NULL!	3	4500	1	3	0	1	1	0	1	1	1	1	1	0	1	0	1	0	0	#NULL!	0	#NULL!	0	#NULL!	0	#NULL!	0	#NULL!	0	#NULL!	0	0	0	0	0	0	-0.03271	3	1	3
311	w2255	1	30	2	2	1	1	2	#NULL!	3	7000	1	3	1	1	1	0	1	1	1	1	1	0	1	1	1	0	0	#NULL!	0	#NULL!	0	#NULL!	0	#NULL!	0	#NULL!	0	#NULL!	0	0	0	0	0	0	1.61325	4	1	4
312	w2256	1	26	2	2	2	1	2	#NULL!	3	3000	1	3	1	1	0	0	1	1	1	1	0	1	0	0	0	0	0	#NULL!	0	#NULL!	0	#NULL!	0	#NULL!	0	#NULL!	0	#NULL!	0	0	0	0	0	0	-1.72091	2	1	4
313	w2257	2	32	2	2	1	1	2	#NULL!	1	#NULL!	1	1	0	0	0	0	0	0	0	0	0	0	0	0	0	0	0	#NULL!	0	#NULL!	0	#NULL!	0	#NULL!	0	#NULL!	0	#NULL!	0	0	0	0	0	0	-6.14776	1	1	4
314	w2258	1	27	2	2	3	3	2	#NULL!	3	5000	3	3	1	1	1	0	1	1	1	1	1	1	1	0	1	1	1	22	0	#NULL!	0	#NULL!	0	#NULL!	0	#NULL!	0	#NULL!	1	0	0	0	0	0	2.477	4	1	1
315	w2259	2	30	2	2	1	1	2	#NULL!	3	4000	1	3	0	0	0	0	0	0	0	0	0	0	0	1	1	0	1	22	0	#NULL!	0	#NULL!	0	#NULL!	0	#NULL!	0	#NULL!	1	0	0	0	0	0	-3.98099	1	1	3
316	w2260	2	25	2	2	1	2	2	#NULL!	3	#NULL!	2	2	0	1	0	0	0	0	0	0	0	0	0	0	0	1	0	#NULL!	0	#NULL!	0	#NULL!	0	#NULL!	0	#NULL!	0	#NULL!	0	0	0	0	0	0	-5.22956	1	1	3
317	w2261	2	25	2	2	2	1	2	#NULL!	3	#NULL!	1	3	0	1	0	0	0	0	0	0	0	0	0	0	0	1	0	#NULL!	0	#NULL!	0	#NULL!	0	#NULL!	0	#NULL!	0	#NULL!	0	0	0	0	0	0	-5.22956	1	1	3
318	w2262	2	20	2	2	2	1	2	#NULL!	1	4000	1	1	0	0	0	0	0	0	1	0	0	0	1	0	1	0	0	#NULL!	0	#NULL!	0	#NULL!	0	#NULL!	0	#NULL!	0	#NULL!	0	0	0	0	0	0	-4.26107	1	1	3
319	w2263	2	32	2	2	1	1	2	#NULL!	1	3000	1	1	0	0	0	0	0	0	0	0	0	0	0	0	1	0	1	22	0	#NULL!	0	#NULL!	0	#NULL!	0	#NULL!	0	#NULL!	1	0	0	0	0	0	-4.81814	1	1	3
320	w2264	2	26	2	2	1	1	2	#NULL!	1	2000	1	1	0	1	0	0	0	0	0	0	1	0	1	0	0	1	0	#NULL!	0	#NULL!	0	#NULL!	0	#NULL!	0	#NULL!	0	#NULL!	0	0	0	0	0	0	-2.57979	1	1	3
321	w2265	1	23	2	2	4	3	1	3333	3	3000	3	3	1	1	1	0	1	1	1	1	1	0	1	1	1	0	0	#NULL!	0	#NULL!	0	#NULL!	0	#NULL!	0	#NULL!	0	#NULL!	0	0	0	0	0	0	1.61325	4	1	4
322	w2266	2	30	2	2	1	3	2	2	1	#NULL!	3	1	0	1	1	0	0	0	1	1	0	0	1	1	0	1	0	#NULL!	0	#NULL!	0	#NULL!	0	#NULL!	0	#NULL!	0	#NULL!	0	0	0	0	0	0	-1.49425	2	1	4
323	w2267	1	28	2	2	3	1	2	#NULL!	3	5000	1	3	1	1	1	0	1	1	1	1	1	0	1	1	0	0	0	#NULL!	0	#NULL!	0	#NULL!	0	#NULL!	0	#NULL!	0	#NULL!	0	0	0	0	0	0	1.61325	4	1	4
324	w2268	1	30	2	2	1	3	2	#NULL!	2	7100	4	2	1	1	1	0	1	1	0	0	1	0	1	0	1	0	0	#NULL!	0	#NULL!	0	#NULL!	0	#NULL!	0	#NULL!	0	#NULL!	0	0	0	0	0	0	-0.62477	2	1	3
325	w2269	2	23	2	1	1	2	2	#NULL!	2	1000	2	2	1	1	0	0	0	1	0	1	0	1	0	1	0	0	0	#NULL!	0	#NULL!	0	#NULL!	0	#NULL!	0	#NULL!	0	#NULL!	0	0	0	0	0	0	-1.49168	2	1	4
326	w2270	2	22	2	2	2	2	2	#NULL!	3	7000	2	3	0	1	0	0	0	0	0	0	0	0	0	1	0	0	0	#NULL!	0	#NULL!	0	#NULL!	0	#NULL!	0	#NULL!	0	#NULL!	0	0	0	0	0	0	-4.39241	1	1	4
327	w2271	2	25	2	2	2	3	2	#NULL!	2	3000	3	2	1	1	1	0	0	1	1	1	0	0	1	1	1	0	0	#NULL!	0	#NULL!	0	#NULL!	0	#NULL!	0	#NULL!	0	#NULL!	0	0	0	0	0	0	0.24225	3	1	4
328	w2272	1	24	2	2	4	1	1	1200	2	6000	1	2	1	1	1	1	1	1	1	1	1	0	1	1	1	1	0	#NULL!	0	#NULL!	0	#NULL!	0	#NULL!	0	#NULL!	0	#NULL!	0	0	0	0	0	0	2.62104	4	2	#NULL!
329	w3332	2	23	2	2	1	1	2	#NULL!	3	#NULL!	1	2	1	1	0	1	1	1	1	0	1	1	1	1	1	1	0	#NULL!	0	#NULL!	0	#NULL!	0	#NULL!	0	#NULL!	0	#NULL!	0	0	0	0	0	0	1.98086	4	1	3
330	w3331	2	30	2	2	1	2	2	#NULL!	2	#NULL!	2	2	0	0	0	0	0	0	0	0	0	0	0	0	1	1	1	2	1	2	0	#NULL!	0	#NULL!	0	#NULL!	0	#NULL!	0	0	0	0	0	0	-6.14776	1	1	4
331	w3330	1	25	2	2	2	1	2	#NULL!	2	5000	1	2	0	0	1	0	1	0	1	1	1	1	1	1	0	0	0	#NULL!	0	#NULL!	0	#NULL!	0	#NULL!	0	#NULL!	0	#NULL!	0	0	0	0	0	0	-0.670169	2	1	3
332	w3329	1	25	2	2	2	1	2	#NULL!	1	#NULL!	1	1	0	0	0	0	0	1	1	1	1	0	1	0	1	0	1	12	0	#NULL!	0	#NULL!	0	#NULL!	0	#NULL!	0	#NULL!	1	0	0	0	0	0	0.16019	3	1	3
333	w3328	1	25	2	2	3	1	2	#NULL!	3	#NULL!	1	3	0	0	1	1	0	0	0	1	1	1	1	1	1	1	1	11	0	#NULL!	0	#NULL!	0	#NULL!	0	#NULL!	0	#NULL!	1	0	0	0	0	0	1.05932	3	1	3
334	w3327	1	23	2	2	3	2	2	#NULL!	2	#NULL!	2	2	0	0	0	0	1	1	1	0	1	0	1	0	0	0	0	#NULL!	0	#NULL!	0	#NULL!	0	#NULL!	0	#NULL!	0	#NULL!	0	0	0	0	0	0	-1.96238	1	1	4
335	w3326	1	27	2	2	3	1	2	#NULL!	2	#NULL!	1	2	0	0	0	0	0	1	0	1	0	1	1	1	1	1	0	#NULL!	0	#NULL!	0	#NULL!	0	#NULL!	0	#NULL!	0	#NULL!	0	0	0	0	0	0	-1.93992	1	1	3
336	w3325	1	20	2	2	3	1	2	#NULL!	3	#NULL!	1	2	0	0	0	0	1	1	0	1	0	1	1	1	0	0	0	#NULL!	0	#NULL!	0	#NULL!	0	#NULL!	0	#NULL!	0	#NULL!	0	0	0	0	0	0	-1.93992	1	1	3
337	w3324	2	22	2	2	1	2	2	#NULL!	3	#NULL!	2	2	0	0	0	0	0	0	1	0	1	0	1	0	0	0	0	#NULL!	0	#NULL!	0	#NULL!	0	#NULL!	0	#NULL!	0	#NULL!	0	0	0	0	0	0	-2.89007	1	1	3
338	w3323	2	25	2	2	2	1	2	#NULL!	1	#NULL!	1	1	0	0	0	0	0	0	1	0	0	0	1	0	1	1	1	22	0	#NULL!	0	#NULL!	0	#NULL!	0	#NULL!	0	#NULL!	1	0	0	0	0	0	-2.93145	1	1	3
339	w3322	1	28	2	2	2	1	2	#NULL!	3	2000	1	3	0	0	0	0	0	0	0	1	1	1	1	1	1	0	0	#NULL!	0	#NULL!	0	#NULL!	0	#NULL!	0	#NULL!	0	#NULL!	0	0	0	0	0	0	-1.49661	2	1	4
340	w3321	1	20	2	2	2	1	2	#NULL!	1	2000	1	1	0	0	0	0	0	1	0	0	0	0	1	0	1	1	1	22	0	#NULL!	0	#NULL!	0	#NULL!	0	#NULL!	0	#NULL!	1	0	0	0	0	0	-2.61168	1	1	3
341	w3320	2	20	2	2	2	1	2	#NULL!	1	#NULL!	1	1	0	0	0	0	1	0	0	0	0	0	1	1	1	1	0	#NULL!	0	#NULL!	0	#NULL!	0	#NULL!	0	#NULL!	0	#NULL!	0	0	0	0	0	0	-4.03184	1	1	3
342	w3319	1	20	2	2	2	1	2	#NULL!	2	#NULL!	1	2	0	0	0	0	1	0	0	0	0	0	0	1	1	1	0	#NULL!	0	#NULL!	0	#NULL!	0	#NULL!	0	#NULL!	0	#NULL!	0	0	0	0	0	0	-5.31061	1	2	#NULL!
343	w3318	1	27	2	2	2	2	2	#NULL!	2	#NULL!	2	2	0	1	1	0	0	1	1	1	1	1	1	1	1	0	0	#NULL!	0	#NULL!	0	#NULL!	0	#NULL!	0	#NULL!	0	#NULL!	0	0	0	0	0	0	1.17573	3	1	3
344	w3317	1	28	2	2	1	2	2	#NULL!	3	#NULL!	2	2	0	0	0	1	1	1	1	1	1	1	1	1	1	0	0	#NULL!	0	#NULL!	0	#NULL!	0	#NULL!	0	#NULL!	0	#NULL!	0	0	0	0	0	0	1.04679	3	1	3
345	w3316	2	25	2	2	2	2	2	#NULL!	2	#NULL!	2	2	0	0	0	0	1	1	1	1	0	1	0	0	0	0	0	#NULL!	0	#NULL!	0	#NULL!	0	#NULL!	0	#NULL!	0	#NULL!	0	0	0	0	0	0	-3.44792	1	1	3
346	w3315	2	27	2	2	3	3	2	#NULL!	2	3000	3	2	0	0	0	1	1	1	1	0	1	0	1	0	0	0	0	#NULL!	0	#NULL!	0	#NULL!	0	#NULL!	0	#NULL!	0	#NULL!	0	0	0	0	0	0	-0.954589	2	1	3
347	w3314	2	25	2	2	3	1	2	#NULL!	1	#NULL!	1	1	0	0	0	0	1	0	1	0	1	1	1	1	1	0	0	#NULL!	0	#NULL!	0	#NULL!	0	#NULL!	0	#NULL!	0	#NULL!	0	0	0	0	0	0	-1.68163	2	1	3
348	w3313	2	35	2	2	1	1	2	#NULL!	1	#NULL!	1	1	0	0	0	0	1	0	1	0	0	1	1	1	1	1	0	#NULL!	1	2	1	2	1	2	1	2	1	2	0	0	0	0	0	1	0.675985	3	2	#NULL!
349	s1173	1	35	2	1	3	2	2	#NULL!	3	#NULL!	2	3	1	1	1	1	1	1	0	0	0	1	1	1	1	1	0	#NULL!	0	#NULL!	0	#NULL!	0	#NULL!	0	#NULL!	0	#NULL!	0	0	0	0	0	0	0.220453	3	2	#NULL!
350	w1174	2	32	2	2	1	2	2	#NULL!	1	#NULL!	2	1	0	0	1	0	1	1	1	1	1	0	1	0	1	1	1	22	0	#NULL!	0	#NULL!	0	#NULL!	0	#NULL!	0	#NULL!	1	0	0	0	0	0	0.378709	3	1	4
351	s1175	2	23	2	2	2	1	2	#NULL!	1	#NULL!	1	1	1	1	0	0	1	1	1	1	1	0	1	1	1	1	0	#NULL!	0	#NULL!	0	#NULL!	0	#NULL!	0	#NULL!	0	#NULL!	0	0	0	0	0	0	1.39473	3	1	4
352	s1176	2	32	2	2	1	1	2	#NULL!	2	#NULL!	1	2	1	1	0	1	1	1	1	0	1	1	1	1	0	1	1	12	0	#NULL!	0	#NULL!	0	#NULL!	0	#NULL!	0	#NULL!	1	0	0	0	0	0	3.31048	4	1	4
353	s1177	2	25	2	1	1	1	2	#NULL!	1	#NULL!	1	1	0	0	0	1	1	1	0	0	1	0	1	0	1	1	1	21	0	#NULL!	0	#NULL!	0	#NULL!	0	#NULL!	0	#NULL!	1	0	0	0	0	0	-0.232891	2	1	4
354	s1178	2	25	2	2	1	1	2	#NULL!	2	#NULL!	1	2	0	0	0	1	1	0	0	0	1	0	1	1	1	0	1	22	0	#NULL!	0	#NULL!	0	#NULL!	0	#NULL!	0	#NULL!	1	0	0	0	0	0	-0.32343	2	2	#NULL!
355	s1179	2	21	2	2	1	1	2	#NULL!	1	#NULL!	1	1	0	0	0	1	0	0	0	0	1	0	0	0	1	0	1	22	0	#NULL!	0	#NULL!	0	#NULL!	0	#NULL!	0	#NULL!	1	0	0	0	0	0	-2.43935	1	1	4
356	s1180	2	20	2	2	1	3	1	222	2	4000	3	2	0	0	1	1	1	1	0	1	0	1	1	1	1	1	0	#NULL!	0	#NULL!	0	#NULL!	0	#NULL!	0	#NULL!	0	#NULL!	0	0	0	0	0	0	-0.713614	2	2	#NULL!
357	s1181	1	26	2	2	1	1	2	#NULL!	3	1500	1	2	0	1	0	1	1	1	0	0	1	0	0	1	1	1	1	22	0	#NULL!	0	#NULL!	0	#NULL!	0	#NULL!	0	#NULL!	1	0	0	0	0	0	0.2437	3	1	4
358	s1182	2	40	3	2	1	1	2	#NULL!	3	4000	1	2	0	1	1	1	1	1	1	1	1	1	1	1	1	0	0	#NULL!	0	#NULL!	0	#NULL!	0	#NULL!	0	#NULL!	0	#NULL!	0	0	0	0	0	0	2.18352	4	2	#NULL!
359	s1183	1	29	2	2	3	1	2	#NULL!	1	#NULL!	1	1	0	0	1	0	1	1	1	1	0	1	0	1	0	0	0	#NULL!	0	#NULL!	0	#NULL!	0	#NULL!	0	#NULL!	0	#NULL!	0	0	0	0	0	0	-2.39224	1	1	4
360	s1184	2	30	2	2	2	1	2	#NULL!	2	2000	1	2	1	1	0	0	1	1	1	0	1	1	1	0	1	0	0	#NULL!	1	1	1	1	1	1	1	2	0	#NULL!	0	0	0	0	0	0	3.4946	4	1	3
361	s1185	2	28	2	2	1	1	2	#NULL!	1	#NULL!	1	1	0	1	1	0	1	1	1	1	1	1	1	1	1	1	1	1	1	1	1	1	1	1	0	#NULL!	0	#NULL!	0	0	0	0	0	0	3.97321	4	1	3
362	s1186	2	18	1	2	2	1	2	#NULL!	1	#NULL!	1	1	1	1	0	0	1	1	1	1	1	1	1	1	1	1	1	2	0	#NULL!	0	#NULL!	0	#NULL!	1	1	1	1	0	0	0	0	0	0	2.69031	4	1	4
363	s1187	2	30	2	1	1	3	2	#NULL!	1	#NULL!	4	1	0	0	0	0	0	0	0	0	0	1	1	1	0	0	1	22	0	#NULL!	0	#NULL!	0	#NULL!	0	#NULL!	0	#NULL!	1	0	0	0	0	0	-2.33094	1	1	3
364	s1188	2	32	2	1	1	2	2	#NULL!	3	9000	2	3	0	0	0	0	1	1	1	1	1	1	1	1	0	0	0	#NULL!	0	#NULL!	0	#NULL!	0	#NULL!	0	#NULL!	0	#NULL!	0	0	0	0	0	0	0.039005	3	1	4
365	s1189	1	23	2	2	3	1	2	#NULL!	3	5000	1	3	1	1	1	1	0	0	1	0	0	0	0	0	1	1	0	#NULL!	0	#NULL!	0	#NULL!	0	#NULL!	0	#NULL!	0	#NULL!	0	0	0	0	0	0	-2.58652	1	1	3
366	s1190	2	25	2	2	1	2	2	#NULL!	1	#NULL!	2	1	0	0	1	1	0	0	0	0	1	1	1	1	1	0	0	#NULL!	0	#NULL!	0	#NULL!	0	#NULL!	0	#NULL!	0	#NULL!	0	0	0	0	0	0	-1.06325	2	1	3
367	s1191	2	28	2	2	2	2	2	#NULL!	1	#NULL!	2	1	0	1	0	1	1	1	0	0	1	1	1	1	1	1	0	#NULL!	0	#NULL!	0	#NULL!	0	#NULL!	0	#NULL!	0	#NULL!	0	0	0	0	0	0	0.564128	3	1	3
368	s1192	1	25	2	2	1	2	2	#NULL!	3	3000	2	2	0	0	0	0	0	0	1	1	1	1	1	1	1	1	0	#NULL!	0	#NULL!	0	#NULL!	0	#NULL!	0	#NULL!	0	#NULL!	0	0	0	0	0	0	-0.888689	2	1	4
369	s1103	1	25	2	2	3	1	2	#NULL!	2	7000	1	2	0	1	1	0	1	1	1	1	1	0	1	0	1	0	1	22	0	#NULL!	0	#NULL!	0	#NULL!	0	#NULL!	0	#NULL!	1	0	0	0	0	0	1.29691	3	1	3
370	s1108	1	28	2	2	2	3	2	#NULL!	1	#NULL!	3	1	1	1	1	0	1	1	1	1	0	1	0	0	1	0	0	#NULL!	0	#NULL!	0	#NULL!	0	#NULL!	0	#NULL!	0	#NULL!	0	0	0	0	0	0	-1.50239	2	1	3
371	s1109	1	23	2	2	2	1	2	#NULL!	3	3000	1	2	0	0	1	1	1	1	1	1	1	1	0	1	0	1	0	#NULL!	0	#NULL!	0	#NULL!	0	#NULL!	0	#NULL!	0	#NULL!	0	0	0	0	0	0	-0.013454	3	1	3
372	s1116	1	35	2	2	1	1	2	#NULL!	1	#NULL!	1	1	0	0	0	0	1	1	1	1	1	0	1	1	1	1	1	2	0	#NULL!	0	#NULL!	0	#NULL!	1	2	0	#NULL!	0	0	0	0	0	0	0.228925	3	1	3
373	s1111	2	30	2	2	2	1	2	#NULL!	2	3000	1	2	0	0	1	1	1	1	1	1	0	1	1	1	1	0	1	2	0	#NULL!	0	#NULL!	0	#NULL!	0	#NULL!	0	#NULL!	0	0	0	0	0	0	-0.10569	3	1	3
374	s1112	2	28	2	2	3	3	2	#NULL!	1	#NULL!	4	1	0	0	1	1	1	1	1	0	0	1	1	1	1	0	0	#NULL!	0	#NULL!	1	4	1	10	1	2	0	#NULL!	0	0	1	1	0	0	6.51497	4	1	3
375	s1113	1	18	1	2	2	1	2	#NULL!	2	#NULL!	1	2	1	1	1	0	1	1	1	1	1	1	1	0	1	1	0	#NULL!	0	#NULL!	0	#NULL!	0	#NULL!	0	#NULL!	0	#NULL!	0	0	0	0	0	0	1.14738	3	1	3
376	s1114	2	25	2	2	2	3	2	#NULL!	2	#NULL!	4	2	1	1	0	0	0	1	1	0	1	0	1	0	0	0	0	#NULL!	1	42	1	1	0	#NULL!	0	#NULL!	0	#NULL!	0	1	0	0	0	0	3.51765	4	1	4
377	s1115	1	18	1	2	3	1	2	#NULL!	3	10000	1	3	1	1	1	0	1	1	1	1	1	0	1	1	1	0	0	#NULL!	0	#NULL!	0	#NULL!	1	5	0	#NULL!	0	#NULL!	0	0	0	1	0	0	2.46225	4	2	#NULL!
378	s1116	1	26	2	2	2	1	2	#NULL!	3	#NULL!	1	2	1	1	1	0	0	1	1	0	1	0	1	0	1	0	0	#NULL!	0	#NULL!	0	#NULL!	0	#NULL!	0	#NULL!	0	#NULL!	0	0	0	0	0	0	-0.016846	3	1	3
379	s1117	2	28	2	2	1	1	2	#NULL!	2	#NULL!	1	2	0	1	0	0	0	1	0	1	1	1	1	1	1	0	1	21	1	12	0	#NULL!	0	#NULL!	0	#NULL!	0	#NULL!	1	1	0	0	0	0	3.48343	4	1	3
380	s1118	2	23	2	2	4	1	2	#NULL!	3	#NULL!	1	3	0	1	1	0	1	1	1	1	1	1	1	1	0	0	0	#NULL!	0	#NULL!	0	#NULL!	0	#NULL!	0	#NULL!	0	#NULL!	0	0	0	0	0	0	1.17573	3	2	#NULL!
381	s1119	1	25	2	2	3	2	2	#NULL!	2	8000	2	2	1	1	1	0	1	1	1	1	1	0	1	1	1	0	0	#NULL!	0	#NULL!	0	#NULL!	0	#NULL!	0	#NULL!	0	#NULL!	0	0	0	0	0	0	1.61325	4	2	#NULL!
382	s1120	2	33	2	2	1	1	2	#NULL!	1	#NULL!	1	1	1	1	0	0	0	0	0	1	0	1	0	0	1	1	1	1	1	1	1	1	0	#NULL!	0	#NULL!	0	#NULL!	0	0	0	0	0	0	-1.30803	2	1	3
383	s1121	2	27	2	2	2	1	2	#NULL!	1	#NULL!	1	1	0	0	0	0	0	0	1	1	1	1	0	1	1	0	1	1	1	4	1	3	1	1	0	#NULL!	0	#NULL!	0	1	1	0	0	0	6.48947	4	1	3
384	s1124	2	35	2	2	1	1	2	#NULL!	1	#NULL!	1	1	1	1	1	1	0	0	0	1	1	1	1	1	1	0	0	#NULL!	0	#NULL!	0	#NULL!	0	#NULL!	0	#NULL!	0	#NULL!	0	0	0	0	0	0	1.45671	3	1	3
385	s1123	2	40	3	2	1	1	2	#NULL!	1	#NULL!	1	1	0	0	0	0	1	0	0	0	0	1	0	0	1	0	1	1	1	1	0	#NULL!	1	2	0	#NULL!	0	#NULL!	0	0	0	0	0	0	-4.92749	1	1	4
386	s1124	1	34	2	2	2	2	2	#NULL!	2	#NULL!	2	2	0	1	1	1	0	1	1	1	1	1	1	1	1	0	0	#NULL!	0	#NULL!	0	#NULL!	0	#NULL!	0	#NULL!	1	3	0	0	0	0	0	1	2.55345	4	2	#NULL!
387	s1125	1	25	2	2	2	1	2	#NULL!	2	1000	1	2	1	1	1	0	1	1	0	1	1	0	1	0	1	0	0	#NULL!	0	#NULL!	0	#NULL!	0	#NULL!	0	#NULL!	0	#NULL!	0	0	0	0	0	0	0.168174	3	1	3
388	s1126	2	26	2	2	2	1	2	#NULL!	3	#NULL!	1	3	1	1	1	0	1	1	1	1	0	0	1	0	1	1	1	2	1	1	1	2	1	2	1	1	0	#NULL!	0	0	0	0	0	0	2.76378	4	2	#NULL!
389	s1127	2	24	2	2	3	1	2	#NULL!	2	3000	1	2	1	1	1	0	1	1	1	1	1	1	1	1	1	0	0	#NULL!	0	#NULL!	0	#NULL!	0	#NULL!	0	#NULL!	0	#NULL!	0	0	0	0	0	0	1.98454	4	1	3
390	s1128	2	28	2	1	1	1	2	#NULL!	1	#NULL!	1	1	0	0	0	0	0	0	0	0	0	1	0	1	1	0	0	#NULL!	0	#NULL!	0	#NULL!	0	#NULL!	0	#NULL!	0	#NULL!	0	0	0	0	0	0	-4.93933	1	2	#NULL!
391	s1129	1	26	2	2	1	2	2	#NULL!	3	#NULL!	2	3	1	1	1	0	1	1	1	1	1	0	1	0	1	0	0	#NULL!	0	#NULL!	0	#NULL!	0	#NULL!	0	#NULL!	0	#NULL!	0	0	0	0	0	0	0.776098	3	1	3
392	s1130	1	33	2	2	1	1	2	#NULL!	1	2000	1	1	1	0	1	1	1	1	1	1	1	0	1	1	1	0	0	#NULL!	0	#NULL!	0	#NULL!	0	#NULL!	0	#NULL!	0	#NULL!	0	0	0	0	0	0	1.70284	4	1	3
393	s1131	2	20	2	1	1	1	2	#NULL!	1	3000	1	1	1	1	1	0	1	1	1	1	1	0	1	0	1	1	1	31	1	1	1	2	1	6	1	1	0	#NULL!	1	0	0	1	0	0	5.46441	4	1	4
394	s1132	2	28	2	1	1	2	2	#NULL!	3	5000	2	3	1	1	1	0	0	1	1	1	1	0	0	1	1	0	0	#NULL!	0	#NULL!	0	#NULL!	0	#NULL!	0	#NULL!	0	#NULL!	0	0	0	0	0	0	0.334486	3	1	1
395	s1133	2	32	2	1	1	2	2	#NULL!	1	#NULL!	2	1	0	0	0	1	1	1	1	1	1	0	1	0	0	0	0	#NULL!	0	#NULL!	0	#NULL!	0	#NULL!	1	5	1	1	0	0	0	0	1	0	0.861072	3	1	4
396	s1134	2	20	2	2	3	1	2	#NULL!	3	#NULL!	1	3	1	1	1	1	0	0	1	0	1	0	1	1	0	0	0	#NULL!	0	#NULL!	0	#NULL!	0	#NULL!	0	#NULL!	0	#NULL!	0	0	0	0	0	0	0.900402	3	1	4
397	s1135	1	28	2	2	2	1	2	#NULL!	3	#NULL!	1	3	1	1	1	1	1	1	1	1	0	1	1	1	0	0	0	#NULL!	0	#NULL!	0	#NULL!	0	#NULL!	0	#NULL!	0	#NULL!	0	0	0	0	0	0	1.62132	4	2	#NULL!
398	s1136	2	34	2	2	2	1	2	#NULL!	1	#NULL!	1	1	0	0	0	1	1	1	1	1	1	0	1	0	1	0	0	#NULL!	0	#NULL!	0	#NULL!	0	#NULL!	0	#NULL!	0	#NULL!	0	0	0	0	0	0	-0.161644	3	1	3
399	s1137	1	20	2	2	3	1	2	#NULL!	1	#NULL!	1	1	1	1	1	0	1	1	0	1	1	0	1	1	1	0	0	#NULL!	0	#NULL!	0	#NULL!	0	#NULL!	0	#NULL!	0	#NULL!	0	0	0	0	0	0	1.00533	3	1	4
400	s1134	2	32	2	2	2	1	2	#NULL!	1	11221	1	1	1	1	0	0	1	1	1	1	1	1	1	1	1	0	0	#NULL!	0	#NULL!	0	#NULL!	0	#NULL!	0	#NULL!	0	#NULL!	0	0	0	0	0	0	1.76602	4	1	4
401	s1139	2	25	2	2	2	1	2	#NULL!	1	#NULL!	1	1	1	1	1	0	1	0	0	1	1	0	1	1	1	1	0	#NULL!	0	#NULL!	0	#NULL!	0	#NULL!	0	#NULL!	0	#NULL!	0	0	0	0	0	0	0.077635	3	1	4
402	s1140	2	26	2	2	2	1	2	#NULL!	1	#NULL!	1	1	0	0	1	1	0	1	1	1	1	1	1	1	0	1	1	12	0	#NULL!	0	#NULL!	0	#NULL!	0	#NULL!	0	#NULL!	1	0	0	0	0	0	2.59493	4	1	4
403	s1141	2	30	2	2	2	1	2	#NULL!	1	4500	1	1	0	0	0	0	1	1	0	0	1	1	1	0	1	0	0	#NULL!	0	#NULL!	0	#NULL!	0	#NULL!	0	#NULL!	0	#NULL!	0	0	0	0	0	0	-2.19902	1	1	4
404	s1142	1	34	2	2	3	1	2	#NULL!	3	#NULL!	1	2	1	1	1	0	1	1	0	1	1	0	1	1	0	0	0	#NULL!	0	#NULL!	0	#NULL!	0	#NULL!	0	#NULL!	0	#NULL!	0	0	0	0	0	0	1.00533	3	1	3
405	s1143	2	30	2	2	2	1	2	#NULL!	2	#NULL!	1	2	1	1	0	1	1	1	1	1	0	0	0	0	0	0	0	#NULL!	0	#NULL!	0	#NULL!	0	#NULL!	0	#NULL!	0	#NULL!	0	0	0	0	0	0	-1.0844	2	1	3
406	s1144	1	18	1	2	2	1	2	#NULL!	3	#NULL!	1	3	0	0	0	1	0	0	0	1	1	1	1	1	1	1	0	#NULL!	0	#NULL!	0	#NULL!	0	#NULL!	0	#NULL!	0	#NULL!	0	0	0	0	0	0	-0.488825	2	1	3
407	s1145	1	20	2	2	1	2	2	#NULL!	3	9000	2	3	0	0	0	0	1	1	1	1	1	1	1	1	1	0	0	#NULL!	0	#NULL!	0	#NULL!	0	#NULL!	0	#NULL!	0	#NULL!	0	0	0	0	0	0	0.039005	3	1	3
408	s1146	1	30	2	2	2	1	2	#NULL!	3	#NULL!	1	3	0	0	0	0	1	1	0	1	0	1	1	1	1	0	0	#NULL!	0	#NULL!	0	#NULL!	0	#NULL!	0	#NULL!	0	#NULL!	0	0	0	0	0	0	-1.93992	1	1	4
409	s1147	2	20	2	2	2	1	2	#NULL!	2	#NULL!	1	2	0	0	0	1	1	1	0	0	1	1	1	0	0	0	0	#NULL!	0	#NULL!	0	#NULL!	0	#NULL!	0	#NULL!	0	#NULL!	0	0	0	0	0	0	-1.19123	2	1	3
410	s1148	1	21	2	2	1	1	2	#NULL!	1	#NULL!	1	1	0	0	0	1	1	1	1	0	1	1	1	1	1	0	0	#NULL!	0	#NULL!	0	#NULL!	0	#NULL!	0	#NULL!	0	#NULL!	0	0	0	0	0	0	0.253849	3	2	#NULL!
411	s1149	2	30	2	2	2	1	2	#NULL!	1	#NULL!	1	1	0	0	0	1	1	0	1	0	0	0	0	0	0	1	0	#NULL!	0	#NULL!	0	#NULL!	0	#NULL!	0	#NULL!	0	#NULL!	0	0	0	0	0	0	-4.53205	1	1	1
412	s1150	2	28	2	2	2	1	2	#NULL!	1	#NULL!	1	1	0	0	0	0	0	0	0	0	0	1	1	1	1	0	0	#NULL!	0	#NULL!	0	#NULL!	0	#NULL!	0	#NULL!	0	#NULL!	0	0	0	0	0	0	-3.66056	1	1	4
413	s1151	2	18	1	2	2	1	2	#NULL!	2	#NULL!	1	2	0	0	1	1	1	1	1	0	0	1	1	1	0	0	0	#NULL!	0	#NULL!	0	#NULL!	0	#NULL!	0	#NULL!	0	#NULL!	0	0	0	0	0	0	-0.898634	2	1	3
414	s1152	1	35	2	2	2	1	2	#NULL!	3	3000	1	3	0	0	0	0	0	0	1	1	1	1	1	1	1	0	0	#NULL!	0	#NULL!	0	#NULL!	0	#NULL!	0	#NULL!	0	#NULL!	0	0	0	0	0	0	-0.888689	2	1	4
415	s1153	1	25	2	2	2	1	2	#NULL!	3	4000	1	3	1	1	1	1	1	1	1	1	1	1	1	1	1	1	0	#NULL!	0	#NULL!	0	#NULL!	0	#NULL!	0	#NULL!	0	#NULL!	0	0	0	0	0	0	2.99232	4	1	3
416	s1154	1	20	2	2	2	3	2	#NULL!	3	#NULL!	4	3	1	1	1	1	1	1	1	1	1	1	0	0	1	0	0	#NULL!	0	#NULL!	0	#NULL!	0	#NULL!	0	#NULL!	0	#NULL!	0	0	0	0	0	0	0.876402	3	2	#NULL!
417	s1156	1	25	2	2	2	1	2	#NULL!	3	#NULL!	1	3	0	1	1	1	0	1	1	1	1	0	1	0	0	0	0	#NULL!	0	#NULL!	0	#NULL!	0	#NULL!	0	#NULL!	0	#NULL!	0	0	0	0	0	0	0.975078	3	1	3
418	s1155	1	25	2	2	4	2	2	#NULL!	1	#NULL!	2	1	1	1	1	0	1	1	0	1	1	0	1	1	1	0	0	#NULL!	0	#NULL!	0	#NULL!	0	#NULL!	0	#NULL!	0	#NULL!	0	0	0	0	0	0	1.00533	3	1	3
419	s1159	1	31	2	2	4	3	1	6195	2	11000	3	2	1	1	0	1	1	1	1	1	1	1	1	1	1	0	0	#NULL!	0	#NULL!	0	#NULL!	0	#NULL!	0	#NULL!	0	#NULL!	0	0	0	0	0	0	2.7738	4	1	3
420	s1165	2	20	2	2	3	3	1	1338	2	3333	3	2	0	0	0	1	1	1	1	1	1	1	1	1	1	0	0	#NULL!	0	#NULL!	0	#NULL!	0	#NULL!	0	#NULL!	0	#NULL!	0	0	0	0	0	0	1.04679	3	2	#NULL!
421	s1166	2	27	2	2	1	2	2	#NULL!	2	#NULL!	2	2	1	1	1	0	0	0	0	1	1	1	1	1	1	0	0	#NULL!	0	#NULL!	0	#NULL!	0	#NULL!	0	#NULL!	0	#NULL!	0	0	0	0	0	0	0.448917	3	1	3
422	s1162	2	20	2	2	2	1	2	#NULL!	1	#NULL!	1	1	1	1	1	0	1	1	1	1	1	1	1	1	1	1	1	3	0	#NULL!	1	3	1	3	1	1	0	#NULL!	1	0	1	0	0	0	10.7278	4	1	4
423	s1164	2	25	2	2	3	1	2	#NULL!	2	#NULL!	1	2	1	1	1	1	0	1	1	1	0	1	1	1	1	0	0	#NULL!	0	#NULL!	0	#NULL!	0	#NULL!	0	#NULL!	0	#NULL!	0	0	0	0	0	0	1.62132	4	1	3
424	s1157	1	23	2	2	3	3	1	1000	2	3000	3	2	1	1	1	1	1	0	1	0	1	0	1	1	1	0	0	#NULL!	0	#NULL!	0	#NULL!	0	#NULL!	0	#NULL!	0	#NULL!	0	0	0	0	0	0	0.900402	3	1	3
425	s1172	2	25	2	2	1	1	2	#NULL!	1	#NULL!	1	1	0	0	0	1	1	1	1	1	1	1	1	1	1	1	1	11	1	11	1	11	1	22	0	#NULL!	0	#NULL!	1	1	1	1	0	0	11.0333	4	2	#NULL!
426	s1158	1	23	2	1	1	2	2	#NULL!	3	#NULL!	2	3	1	1	1	0	1	1	1	0	1	0	1	1	1	0	0	#NULL!	0	#NULL!	0	#NULL!	0	#NULL!	0	#NULL!	0	#NULL!	0	0	0	0	0	0	0.820309	3	1	3
427	s1160	1	23	2	1	2	2	2	#NULL!	2	8000	2	2	1	1	1	1	1	1	0	1	1	0	1	1	1	0	0	#NULL!	0	#NULL!	0	#NULL!	0	#NULL!	0	#NULL!	0	#NULL!	0	0	0	0	0	0	2.01312	4	1	3
428	s1161	2	41	3	2	1	2	2	#NULL!	2	3500	2	2	1	1	1	1	1	0	1	0	1	1	1	1	1	0	0	#NULL!	0	#NULL!	0	#NULL!	0	#NULL!	0	#NULL!	0	#NULL!	0	0	0	0	0	0	1.27168	3	1	3
429	s1158	2	22	2	1	1	2	2	#NULL!	2	#NULL!	2	2	1	1	1	1	1	1	1	1	1	1	1	0	0	0	0	#NULL!	0	#NULL!	0	#NULL!	0	#NULL!	0	#NULL!	0	#NULL!	0	0	0	0	0	0	2.15517	4	1	3
430	s1163	1	30	2	2	2	1	2	#NULL!	3	#NULL!	1	3	1	1	1	0	1	1	1	1	1	1	1	1	1	0	0	#NULL!	0	#NULL!	0	#NULL!	0	#NULL!	0	#NULL!	0	#NULL!	0	0	0	0	0	0	1.98454	4	1	3
431	s1166	1	23	2	2	1	1	2	#NULL!	2	#NULL!	1	2	1	1	1	1	1	1	1	1	1	1	1	1	1	0	1	22	0	#NULL!	0	#NULL!	0	#NULL!	0	#NULL!	0	#NULL!	1	0	0	0	0	0	4.32195	4	1	1
432	s1104	2	20	2	2	2	1	2	#NULL!	3	#NULL!	1	3	0	0	0	0	0	0	0	0	0	0	1	1	1	1	1	1	1	3	1	2	1	1	0	#NULL!	0	#NULL!	0	1	0	0	0	0	0.570163	3	1	4
433	s1162	2	18	1	2	1	2	2	#NULL!	2	3000	2	2	1	1	1	1	1	1	1	1	1	1	1	0	0	0	0	#NULL!	0	#NULL!	0	#NULL!	0	#NULL!	0	#NULL!	0	#NULL!	0	0	0	0	0	0	2.15517	4	1	1
434	s1155	2	40	3	2	1	2	2	#NULL!	2	#NULL!	2	2	1	1	1	1	1	1	1	1	1	1	1	1	1	0	0	#NULL!	0	#NULL!	0	#NULL!	0	#NULL!	0	#NULL!	0	#NULL!	0	0	0	0	0	0	2.99232	4	1	1
435	s1114	2	33	2	2	1	2	1	222	2	3000	2	2	1	1	1	1	1	1	1	1	1	1	0	0	0	0	0	#NULL!	0	#NULL!	0	#NULL!	0	#NULL!	0	#NULL!	0	#NULL!	0	0	0	0	0	0	0.876402	3	1	4
436	s1193	2	28	2	2	1	2	2	#NULL!	2	#NULL!	2	2	0	0	1	1	1	1	1	0	1	1	1	1	1	0	0	#NULL!	0	#NULL!	0	#NULL!	0	#NULL!	0	#NULL!	0	#NULL!	0	0	0	0	0	0	0.472369	3	1	4
437	s1105	2	34	2	2	2	1	2	#NULL!	3	#NULL!	1	2	1	1	1	1	1	1	1	1	0	1	0	1	1	0	0	#NULL!	0	#NULL!	0	#NULL!	0	#NULL!	0	#NULL!	0	#NULL!	0	0	0	0	0	0	0.342554	3	1	3
438	s1106	2	25	2	1	1	2	2	#NULL!	2	#NULL!	2	2	1	1	1	1	1	1	1	1	1	1	1	1	1	1	1	1	1	1	1	1	1	1	1	1	1	1	0	0	0	0	0	0	6.7141	4	1	3
439	s1107	1	22	2	2	3	1	2	#NULL!	3	#NULL!	1	3	1	0	0	0	0	0	0	0	0	1	1	1	1	0	0	#NULL!	0	#NULL!	0	#NULL!	0	#NULL!	0	#NULL!	0	#NULL!	0	0	0	0	0	0	-2.85175	1	1	3
440	s1171	2	23	2	1	1	2	2	#NULL!	1	#NULL!	2	1	0	0	0	0	0	0	0	0	0	0	1	1	1	0	0	#NULL!	0	#NULL!	0	#NULL!	0	#NULL!	0	#NULL!	0	#NULL!	0	0	0	0	0	0	-4.03184	1	1	4
441	s1170	2	27	2	2	2	1	2	#NULL!	1	#NULL!	1	1	0	0	0	1	1	1	1	1	1	1	1	0	1	0	0	#NULL!	0	#NULL!	0	#NULL!	0	#NULL!	0	#NULL!	0	#NULL!	0	0	0	0	0	0	0.209638	3	2	#NULL!
442	s1169	2	35	2	2	1	1	2	#NULL!	1	#NULL!	1	1	1	1	1	1	1	1	1	1	1	1	1	1	1	1	1	22	0	#NULL!	0	#NULL!	0	#NULL!	0	#NULL!	0	#NULL!	1	0	0	0	0	0	4.32195	4	1	3
443	s1167	1	23	2	2	2	1	2	#NULL!	3	#NULL!	1	3	1	1	1	0	0	1	1	1	0	1	0	0	0	0	0	#NULL!	0	#NULL!	0	#NULL!	0	#NULL!	0	#NULL!	0	#NULL!	0	0	0	0	0	0	-1.50239	2	1	3
444	s1168	1	23	2	2	2	1	2	#NULL!	2	6000	1	2	1	1	1	0	0	0	1	1	1	1	1	1	0	0	0	#NULL!	0	#NULL!	0	#NULL!	0	#NULL!	0	#NULL!	0	#NULL!	0	0	0	0	0	0	1.05684	3	2	#NULL!
445	s1193	1	29	2	2	3	1	2	#NULL!	2	#NULL!	1	2	1	1	1	1	1	1	1	0	1	0	1	1	1	0	0	#NULL!	0	#NULL!	0	#NULL!	0	#NULL!	0	#NULL!	0	#NULL!	0	0	0	0	0	0	1.8281	4	1	4
446	s2141	2	18	1	2	1	1	2	#NULL!	2	#NULL!	1	2	0	0	0	1	1	1	1	1	1	1	1	1	1	0	0	#NULL!	0	#NULL!	0	#NULL!	0	#NULL!	0	#NULL!	0	#NULL!	0	0	0	0	0	0	1.04679	3	1	4
447	s2140	1	30	2	2	1	1	2	#NULL!	1	#NULL!	1	1	0	0	1	0	1	0	1	1	1	1	1	1	1	1	0	#NULL!	0	#NULL!	0	#NULL!	0	#NULL!	0	#NULL!	0	#NULL!	0	0	0	0	0	0	-0.670169	2	1	4
448	s2139	2	23	2	2	1	1	2	#NULL!	1	#NULL!	1	1	1	1	0	1	1	0	0	1	1	1	0	1	0	0	0	#NULL!	0	#NULL!	0	#NULL!	0	#NULL!	0	#NULL!	0	#NULL!	0	0	0	0	0	0	-0.040581	3	1	3
449	s2138	1	17	1	2	1	1	2	#NULL!	2	#NULL!	1	2	0	1	1	0	1	0	0	0	1	0	1	0	1	1	1	1	0	#NULL!	0	#NULL!	0	#NULL!	0	#NULL!	0	#NULL!	0	0	0	0	0	0	-2.36127	1	2	#NULL!
450	s2137	2	20	2	2	1	1	2	#NULL!	1	#NULL!	1	1	1	1	1	0	1	1	0	0	1	1	1	1	1	1	1	1	1	11	1	1	0	#NULL!	0	#NULL!	0	#NULL!	0	1	0	0	0	0	4.33668	4	2	#NULL!
451	s2136	2	28	2	2	1	1	2	#NULL!	1	#NULL!	1	1	0	0	0	1	1	0	0	0	1	0	1	1	1	0	0	#NULL!	0	#NULL!	0	#NULL!	0	#NULL!	0	#NULL!	0	#NULL!	0	0	0	0	0	0	-1.65305	2	1	3
452	s2135	2	26	2	2	1	1	2	#NULL!	1	#NULL!	1	1	1	1	0	1	1	1	1	0	1	0	1	1	1	1	0	#NULL!	0	#NULL!	0	#NULL!	0	#NULL!	0	#NULL!	0	#NULL!	0	0	0	0	0	0	1.60958	3	1	3
453	s2134	2	25	2	2	1	2	2	#NULL!	1	#NULL!	2	1	0	0	0	1	0	0	0	0	0	1	0	1	1	0	0	#NULL!	0	#NULL!	0	#NULL!	0	#NULL!	0	#NULL!	0	#NULL!	0	0	0	0	0	0	-3.93154	1	1	3
454	s2133	1	32	2	2	2	2	2	#NULL!	2	#NULL!	2	2	0	1	1	0	1	0	1	0	1	0	1	1	1	0	0	#NULL!	0	#NULL!	0	#NULL!	0	#NULL!	0	#NULL!	0	#NULL!	0	0	0	0	0	0	-0.916194	2	1	3
455	s2132	2	33	2	2	1	1	2	#NULL!	3	#NULL!	1	3	0	0	0	0	0	1	1	0	1	1	1	1	1	1	0	#NULL!	0	#NULL!	0	#NULL!	0	#NULL!	0	#NULL!	0	#NULL!	0	0	0	0	0	0	-0.753939	2	1	4
456	s2131	2	34	2	2	1	1	2	#NULL!	1	#NULL!	1	1	0	0	0	0	1	0	1	0	1	0	1	0	1	1	0	#NULL!	0	#NULL!	0	#NULL!	0	#NULL!	0	#NULL!	0	#NULL!	0	0	0	0	0	0	-2.89007	1	1	3
457	s2130	2	25	2	2	1	1	2	#NULL!	1	#NULL!	1	1	0	1	0	1	1	0	0	0	1	0	1	1	1	1	0	#NULL!	1	2	1	1	0	#NULL!	0	#NULL!	0	#NULL!	0	0	0	0	0	0	1.21364	3	1	3
458	s1129	2	26	2	2	1	1	2	#NULL!	1	#NULL!	1	1	0	0	0	1	1	0	0	0	1	1	1	1	0	1	1	12	0	#NULL!	0	#NULL!	0	#NULL!	0	#NULL!	0	#NULL!	1	0	0	0	0	0	0.047853	3	1	4
459	s2128	2	18	1	2	2	1	2	#NULL!	3	5000	1	3	1	1	0	1	1	1	1	1	1	1	0	1	1	1	1	1	1	1	1	1	1	1	1	1	1	2	0	0	0	0	0	1	5.22366	4	1	3
460	s2127	2	27	2	2	2	1	2	#NULL!	1	#NULL!	1	1	0	1	0	1	1	1	1	1	0	1	0	1	0	1	0	#NULL!	0	#NULL!	0	#NULL!	0	#NULL!	0	#NULL!	0	#NULL!	0	0	0	0	0	0	-0.684774	2	1	3
461	s2126	2	34	2	2	1	2	2	#NULL!	2	3000	2	2	1	0	0	0	1	0	0	0	1	1	1	1	0	0	0	#NULL!	0	#NULL!	0	#NULL!	0	#NULL!	0	#NULL!	0	#NULL!	0	0	0	0	0	0	-1.48075	2	1	3
462	s2125	2	30	2	2	2	3	2	#NULL!	1	3000	4	1	0	0	0	1	1	1	1	1	1	0	1	1	1	1	0	#NULL!	0	#NULL!	0	#NULL!	0	#NULL!	0	#NULL!	0	#NULL!	0	0	0	0	0	0	0.675511	3	1	1
463	s2124	1	18	1	1	2	1	2	#NULL!	1	#NULL!	1	1	0	0	1	1	0	0	1	0	0	1	0	1	0	0	0	#NULL!	0	#NULL!	0	#NULL!	0	#NULL!	0	#NULL!	0	#NULL!	0	0	0	0	0	0	-3.10509	1	2	#NULL!
464	s2123	2	25	2	2	1	1	2	#NULL!	1	#NULL!	1	1	0	0	0	1	0	1	1	1	0	1	0	1	0	0	0	#NULL!	0	#NULL!	0	#NULL!	0	#NULL!	0	#NULL!	0	#NULL!	0	0	0	0	0	0	-1.60298	2	1	3
465	s2122	2	27	2	2	1	1	2	#NULL!	1	#NULL!	1	1	1	1	0	1	1	0	1	1	1	1	0	1	1	0	0	#NULL!	0	#NULL!	0	#NULL!	0	#NULL!	0	#NULL!	0	#NULL!	0	0	0	0	0	0	0.567343	3	1	3
466	s1121	2	35	2	2	1	1	2	#NULL!	1	3000	1	1	1	1	0	1	1	1	0	1	1	1	1	1	1	0	0	#NULL!	0	#NULL!	0	#NULL!	0	#NULL!	0	#NULL!	0	#NULL!	0	0	0	0	0	0	2.16588	4	1	4
467	s1120	2	25	2	2	1	1	2	#NULL!	1	#NULL!	1	1	0	1	0	0	1	1	0	0	1	1	0	1	1	1	0	#NULL!	1	1	0	#NULL!	1	1	1	1	1	1	0	0	0	0	0	0	0.050856	3	1	3
468	s2119	2	18	1	2	1	1	2	#NULL!	1	#NULL!	1	1	1	1	1	1	1	1	1	1	1	1	1	1	1	0	0	#NULL!	0	#NULL!	0	#NULL!	0	#NULL!	0	#NULL!	0	#NULL!	0	0	0	0	0	0	2.99232	4	1	4
469	s2118	2	20	2	2	2	1	2	#NULL!	1	#NULL!	1	1	0	0	0	1	1	1	1	0	0	1	0	1	1	1	0	#NULL!	0	#NULL!	0	#NULL!	0	#NULL!	0	#NULL!	0	#NULL!	0	0	0	0	0	0	-2.39592	1	1	3
470	s2117	1	25	2	2	1	1	2	#NULL!	1	#NULL!	1	1	0	1	1	1	1	1	1	1	1	1	1	1	0	1	0	#NULL!	1	2	1	2	1	1	1	1	1	4	0	0	0	0	0	1	5.91214	4	2	#NULL!
471	s1116	1	30	2	2	1	1	2	#NULL!	1	#NULL!	1	1	1	1	1	1	1	1	1	1	1	1	1	1	0	1	1	2	1	1	0	#NULL!	1	1	1	2	0	#NULL!	0	0	0	0	0	0	4.40252	4	1	3
472	s2115	1	20	2	1	1	2	2	#NULL!	1	#NULL!	2	1	0	1	0	1	1	0	0	1	1	0	0	1	0	0	1	42	1	10	1	2	1	11	1	1	0	#NULL!	1	1	0	1	0	0	5.27216	4	1	3
473	s2114	1	26	2	2	2	2	2	#NULL!	1	#NULL!	2	1	0	0	1	1	1	1	1	1	1	0	0	1	0	0	0	#NULL!	0	#NULL!	0	#NULL!	0	#NULL!	0	#NULL!	0	#NULL!	0	0	0	0	0	0	-0.384737	2	2	#NULL!
474	s2113	2	42	3	1	1	2	2	#NULL!	1	#NULL!	2	1	0	0	0	1	1	1	1	1	1	1	1	1	1	1	0	#NULL!	1	2	1	1	1	4	1	3	1	1	0	0	0	1	0	0	4.76857	4	1	3
475	s2112	1	15	1	2	2	1	2	#NULL!	3	#NULL!	1	2	0	0	0	0	1	1	0	1	1	0	1	0	0	0	0	#NULL!	0	#NULL!	0	#NULL!	0	#NULL!	0	#NULL!	0	#NULL!	0	0	0	0	0	0	-1.77736	1	1	3
476	s1111	2	30	2	2	1	1	2	#NULL!	1	#NULL!	1	1	0	0	0	0	1	1	0	0	1	1	1	1	1	0	0	#NULL!	0	#NULL!	0	#NULL!	0	#NULL!	0	#NULL!	0	#NULL!	0	0	0	0	0	0	-1.36186	2	1	3
477	s1110	2	29	2	2	1	1	2	#NULL!	1	#NULL!	1	1	0	1	0	0	1	1	1	1	0	1	1	1	0	1	1	1	1	2	1	7	1	3	1	3	0	#NULL!	0	0	1	0	0	0	6.99981	4	1	3
478	s2109	2	26	2	2	1	2	2	#NULL!	1	#NULL!	2	1	0	0	0	0	1	1	0	0	1	1	1	1	0	1	1	2	1	2	1	3	1	1	0	#NULL!	0	#NULL!	0	0	1	0	0	0	5.49054	4	1	3
479	s2108	2	20	2	2	2	1	2	#NULL!	1	#NULL!	1	1	0	1	0	0	1	0	0	1	1	0	1	1	0	1	0	#NULL!	0	#NULL!	0	#NULL!	0	#NULL!	0	#NULL!	0	#NULL!	0	0	0	0	0	0	-0.949693	2	1	3
480	s2107	2	35	2	2	1	1	2	#NULL!	1	#NULL!	1	1	1	1	1	0	0	1	1	0	1	1	0	1	0	1	0	#NULL!	1	3	1	3	1	3	1	1	1	1	0	1	1	0	0	0	9.49404	4	1	3
481	s2106	1	30	2	2	1	1	2	#NULL!	1	#NULL!	1	1	0	1	0	1	1	1	0	1	1	0	0	0	0	0	0	#NULL!	0	#NULL!	0	#NULL!	0	#NULL!	0	#NULL!	0	#NULL!	0	0	0	0	0	0	-1.13013	2	1	3
482	s2105	2	25	2	2	2	1	2	#NULL!	1	#NULL!	1	1	0	1	0	0	1	1	1	1	1	1	1	1	1	0	0	#NULL!	0	#NULL!	0	#NULL!	0	#NULL!	0	#NULL!	0	#NULL!	0	0	0	0	0	0	0.957208	3	1	3
483	s2104	2	28	2	2	1	1	2	#NULL!	2	#NULL!	1	2	0	0	0	1	1	0	0	1	1	1	1	1	0	0	0	#NULL!	0	#NULL!	0	#NULL!	0	#NULL!	0	#NULL!	0	#NULL!	0	0	0	0	0	0	-0.488825	2	1	3
484	s2103	1	28	2	2	4	3	1	2000	2	7000	3	2	0	0	0	0	0	0	0	0	0	0	0	0	0	0	0	#NULL!	0	#NULL!	0	#NULL!	0	#NULL!	0	#NULL!	0	#NULL!	0	0	0	0	0	0	-6.14776	1	1	3
485	s2102	2	27	2	2	1	1	2	#NULL!	1	#NULL!	1	1	0	0	0	1	1	1	1	1	0	1	0	1	1	1	1	22	0	#NULL!	0	#NULL!	0	#NULL!	0	#NULL!	0	#NULL!	1	0	0	0	0	0	-0.273354	2	1	3
486	s2001	2	25	2	2	1	1	2	#NULL!	1	#NULL!	1	1	1	1	0	1	1	1	0	0	0	1	0	0	0	0	1	2	1	1	1	1	1	4	1	2	1	1	0	0	0	1	0	0	1.60779	3	1	1
487	s2002	2	22	2	2	1	1	2	#NULL!	1	2500	1	1	0	0	0	0	0	0	0	0	0	1	1	0	1	0	0	#NULL!	1	2	1	4	0	#NULL!	0	#NULL!	1	3	0	0	1	0	0	1	1.87563	4	1	4
488	s2003	2	30	2	2	1	1	2	#NULL!	1	#NULL!	1	1	1	1	1	0	0	0	0	0	0	1	1	1	1	1	0	#NULL!	0	#NULL!	0	#NULL!	0	#NULL!	0	#NULL!	0	#NULL!	0	0	0	0	0	0	-1.71503	2	1	3
489	s2004	2	30	2	2	1	1	2	#NULL!	1	#NULL!	1	1	0	0	0	1	1	1	0	1	1	1	0	1	1	1	0	#NULL!	0	#NULL!	0	#NULL!	0	#NULL!	0	#NULL!	0	#NULL!	0	0	0	0	0	0	-0.839898	2	1	3
490	s2005	2	26	2	1	1	2	2	#NULL!	1	1500	2	1	0	1	0	0	0	0	0	0	0	0	0	0	0	0	0	#NULL!	0	#NULL!	0	#NULL!	0	#NULL!	0	#NULL!	0	#NULL!	0	0	0	0	0	0	-5.22956	1	1	4
491	s2006	1	28	2	2	2	1	2	#NULL!	1	1000	1	1	0	1	0	0	0	0	0	0	0	0	0	0	1	0	0	#NULL!	0	#NULL!	0	#NULL!	0	#NULL!	0	#NULL!	0	#NULL!	0	0	0	0	0	0	-5.22956	1	1	4
492	s2007	2	31	2	2	1	2	2	#NULL!	1	#NULL!	2	1	0	0	0	0	0	0	0	0	0	0	0	0	1	1	0	#NULL!	0	#NULL!	0	#NULL!	0	#NULL!	0	#NULL!	0	#NULL!	0	0	0	0	0	0	-6.14776	1	1	3
493	s2008	2	27	2	2	2	1	2	#NULL!	1	3300	1	1	1	1	0	0	1	1	0	0	0	1	0	0	0	1	0	#NULL!	0	#NULL!	0	#NULL!	0	#NULL!	0	#NULL!	0	#NULL!	0	0	0	0	0	0	-3.12178	1	2	#NULL!
494	s2009	2	24	2	2	1	1	2	#NULL!	1	1000	1	1	0	0	0	1	0	0	0	0	0	1	0	0	1	0	0	#NULL!	0	#NULL!	0	#NULL!	0	#NULL!	0	#NULL!	0	#NULL!	0	0	0	0	0	0	-4.76869	1	1	4
495	s2010	2	22	2	1	1	2	2	#NULL!	1	1800	2	1	1	1	0	0	0	1	0	0	0	0	1	1	0	1	0	#NULL!	1	3	0	#NULL!	1	1	0	#NULL!	0	#NULL!	0	1	0	0	0	0	1.27638	3	2	#NULL!
496	s2011	2	25	2	2	1	1	2	#NULL!	1	5000	1	1	0	1	0	0	0	0	0	0	1	0	1	1	0	0	1	2	1	3	1	3	0	#NULL!	0	#NULL!	0	#NULL!	0	1	1	0	0	0	6.06529	4	2	#NULL!
497	s2012	2	26	2	2	1	1	1	800	1	2000	1	1	0	1	0	0	1	1	0	0	1	0	1	0	1	0	0	#NULL!	1	22	0	#NULL!	0	#NULL!	0	#NULL!	0	#NULL!	0	1	0	0	0	0	0.152421	3	1	3
498	s2013	2	25	2	2	1	2	2	#NULL!	1	2000	2	1	0	1	1	0	1	0	1	0	1	0	1	0	0	1	1	22	1	1	0	#NULL!	0	#NULL!	0	#NULL!	1	2	1	0	0	0	0	1	-0.053794	3	1	3
499	s2014	2	25	2	2	1	1	2	#NULL!	1	3000	1	1	1	1	1	0	0	1	0	0	0	1	0	1	1	1	1	22	0	#NULL!	1	3	1	2	0	#NULL!	0	#NULL!	1	0	1	0	0	0	6.11592	4	1	4
500	s2015	2	24	2	2	1	2	2	#NULL!	1	2500	2	1	0	0	0	0	0	0	1	0	0	0	0	0	1	0	0	#NULL!	1	3	0	#NULL!	1	2	1	4	1	5	0	1	0	0	1	1	-1.85677	1	1	4
501	s2016	2	36	3	2	1	2	2	#NULL!	1	100	2	1	0	0	0	0	1	1	1	0	0	1	1	0	0	1	0	#NULL!	1	2	0	#NULL!	0	#NULL!	0	#NULL!	1	4	0	0	0	0	0	1	-2.59216	1	2	#NULL!
502	s2017	2	25	2	2	1	1	2	#NULL!	1	500	1	1	0	0	0	0	1	1	0	0	0	1	1	0	0	1	0	#NULL!	0	#NULL!	1	2	0	#NULL!	1	3	1	2	0	0	0	0	0	1	-0.690392	2	1	3
503	s2018	2	35	2	2	2	1	2	#NULL!	2	3000	1	2	0	0	0	0	0	1	0	0	0	0	1	1	0	1	0	#NULL!	0	#NULL!	0	#NULL!	0	#NULL!	0	#NULL!	0	#NULL!	0	0	0	0	0	0	-3.10415	1	2	#NULL!
504	s2019	2	29	2	2	1	1	2	#NULL!	1	2500	1	1	0	1	0	0	0	0	0	1	0	1	0	0	1	0	0	#NULL!	0	#NULL!	0	#NULL!	1	2	0	#NULL!	1	2	0	0	0	0	0	1	-2.84641	1	1	4
505	s2020	2	35	2	2	2	1	2	#NULL!	1	3500	1	1	0	0	0	1	0	0	0	0	0	0	1	0	0	1	0	#NULL!	1	21	0	#NULL!	0	#NULL!	0	#NULL!	1	2	0	1	0	0	0	1	-1.68676	2	2	#NULL!
506	s2021	2	35	2	2	1	1	2	#NULL!	1	#NULL!	1	1	1	0	1	1	1	1	1	1	0	1	0	0	0	0	0	#NULL!	1	2	1	1	1	1	1	4	1	6	0	0	0	0	1	1	2.41424	4	2	#NULL!
507	s2022	2	25	2	2	1	2	2	#NULL!	1	500	2	1	0	0	0	0	0	0	0	0	0	0	0	0	1	0	1	22	1	3	0	#NULL!	0	#NULL!	0	#NULL!	0	#NULL!	1	1	0	0	0	0	-3.01362	1	2	#NULL!
508	s2023	2	30	2	2	1	1	2	#NULL!	2	1000	1	2	1	0	0	1	1	1	0	0	0	0	1	0	0	0	1	2	0	#NULL!	0	#NULL!	1	2	0	#NULL!	0	#NULL!	0	0	0	0	0	0	-1.27571	2	1	4
509	s2024	2	25	2	2	1	1	2	#NULL!	1	2500	1	1	1	0	0	0	0	0	0	0	1	0	0	1	0	0	0	#NULL!	1	42	1	10	1	22	0	#NULL!	0	#NULL!	0	1	1	1	0	0	5.52612	4	1	3
510	s2025	2	22	2	2	1	2	2	#NULL!	1	3500	2	1	0	1	1	0	0	1	0	0	0	1	0	1	0	0	0	#NULL!	0	#NULL!	1	1	1	2	0	#NULL!	0	#NULL!	0	0	0	0	0	0	-0.077424	3	2	#NULL!
511	s2026	2	25	2	2	1	2	2	#NULL!	1	2000	2	1	1	0	1	0	1	1	0	0	0	0	0	0	1	0	1	2	1	1	0	#NULL!	0	#NULL!	0	#NULL!	0	#NULL!	0	0	0	0	0	0	-4.19274	1	1	3
512	s2022	2	27	2	2	2	2	2	#NULL!	1	2000	2	1	1	1	0	0	0	0	0	0	0	0	0	0	0	1	0	#NULL!	1	2	1	1	0	#NULL!	0	#NULL!	1	2	0	0	0	0	0	1	-2.10233	1	1	4
513	s2028	2	25	2	2	2	1	2	#NULL!	1	1500	1	1	0	0	0	1	1	1	0	0	0	0	1	1	0	0	0	#NULL!	1	4	1	2	1	3	1	1	0	#NULL!	0	1	0	0	0	0	3.06685	4	1	3
514	s2029	2	20	2	2	2	1	2	#NULL!	1	2000	1	1	1	0	0	0	0	0	0	0	0	0	0	0	0	0	0	#NULL!	1	2	1	1	0	#NULL!	0	#NULL!	0	#NULL!	0	0	0	0	0	0	-3.39046	1	2	#NULL!
515	s2030	2	30	2	2	1	1	2	#NULL!	2	1000	1	2	1	1	1	1	1	1	0	1	0	1	1	1	1	1	1	1	1	3	0	#NULL!	0	#NULL!	1	5	0	#NULL!	0	1	0	0	1	0	3.47755	4	1	3
516	s2031	2	23	2	2	1	1	2	#NULL!	1	3500	1	1	0	1	0	0	0	0	0	0	0	1	0	1	0	1	1	1	0	#NULL!	0	#NULL!	0	#NULL!	0	#NULL!	0	#NULL!	0	0	0	0	0	0	-4.02112	1	2	#NULL!
517	s2032	2	25	2	2	2	1	2	#NULL!	1	3500	1	1	1	0	1	0	1	0	0	0	1	0	1	0	0	0	1	1	0	#NULL!	1	12	1	2	0	#NULL!	0	#NULL!	0	0	1	0	0	0	4.38174	4	2	#NULL!
518	s2033	2	32	2	2	1	1	2	#NULL!	1	2000	1	1	1	0	0	0	1	1	0	0	0	0	0	1	0	0	1	2	1	1	1	2	0	#NULL!	1	1	0	#NULL!	0	0	0	0	0	0	-1.06441	2	1	4
519	s2034	2	25	2	2	3	3	1	800	2	2500	3	2	0	1	0	0	1	0	0	0	1	0	0	0	1	0	1	2	0	#NULL!	1	4	0	#NULL!	1	3	0	#NULL!	0	0	1	0	0	0	2.70605	4	2	#NULL!
520	s2035	1	26	2	2	1	2	2	#NULL!	1	400	2	1	0	0	0	0	0	0	0	0	0	0	0	0	0	0	0	#NULL!	0	#NULL!	0	#NULL!	0	#NULL!	0	#NULL!	0	#NULL!	0	0	0	0	0	0	-6.14776	1	2	#NULL!
521	s2036	1	25	2	2	1	1	2	#NULL!	1	3000	1	1	0	1	0	0	0	1	0	0	0	1	0	0	0	0	0	#NULL!	1	3	1	2	0	#NULL!	0	#NULL!	1	3	0	1	0	0	0	1	0.192361	3	1	4
522	s2037	2	35	2	2	1	1	2	#NULL!	1	3500	1	1	1	1	0	0	1	1	0	0	0	1	0	0	0	0	1	2	1	2	0	#NULL!	0	#NULL!	0	#NULL!	0	#NULL!	0	0	0	0	0	0	-3.12178	1	2	#NULL!
523	s2038	2	28	2	2	2	2	2	#NULL!	1	1400	2	1	1	1	0	0	0	0	0	0	0	0	0	1	0	1	0	#NULL!	1	22	0	#NULL!	0	#NULL!	0	#NULL!	0	#NULL!	0	1	0	0	0	0	-1.77908	1	1	4
524	s2039	2	28	2	2	1	1	2	#NULL!	1	500	1	1	0	0	0	1	1	0	0	0	0	0	0	0	0	0	0	#NULL!	0	#NULL!	0	#NULL!	0	#NULL!	0	#NULL!	0	#NULL!	0	0	0	0	0	0	-5.13998	1	1	3
525	s2040	2	28	2	2	1	2	2	#NULL!	1	300	2	1	0	0	0	0	0	0	0	0	0	0	0	0	1	0	1	22	0	#NULL!	0	#NULL!	0	#NULL!	0	#NULL!	0	#NULL!	1	0	0	0	0	0	-4.81814	1	2	#NULL!
526	s2041	1	23	2	1	1	2	2	#NULL!	3	6000	2	3	1	1	1	1	1	1	1	1	1	1	0	1	0	1	0	#NULL!	0	#NULL!	0	#NULL!	0	#NULL!	0	#NULL!	0	#NULL!	0	0	0	0	0	0	1.71356	4	1	3
527	s2042	2	29	2	2	1	1	2	#NULL!	1	#NULL!	1	1	1	1	1	1	1	1	1	1	1	0	1	0	1	0	1	22	0	#NULL!	0	#NULL!	0	#NULL!	0	#NULL!	0	#NULL!	1	0	0	0	0	0	3.11351	4	1	3
528	s2043	2	25	2	2	1	1	2	#NULL!	1	800	1	1	1	0	1	0	0	0	0	0	1	0	1	0	0	0	0	#NULL!	0	#NULL!	0	#NULL!	0	#NULL!	0	#NULL!	0	#NULL!	0	0	0	0	0	0	-2.47067	1	2	#NULL!
529	s2o44	2	35	2	2	1	1	2	#NULL!	1	2000	1	1	0	0	0	0	0	0	0	0	0	0	1	0	1	0	0	#NULL!	1	2	1	3	0	#NULL!	0	#NULL!	0	#NULL!	0	0	1	0	0	0	1.13441	3	1	3
530	s2045	2	23	2	2	1	1	2	#NULL!	1	350	1	1	0	0	1	0	0	0	0	1	0	0	0	0	1	1	0	#NULL!	1	22	0	#NULL!	0	#NULL!	0	#NULL!	0	#NULL!	0	1	0	0	0	0	-3.33178	1	1	3
531	s2046	2	21	2	1	1	2	2	#NULL!	1	2500	2	1	1	1	1	0	1	0	1	0	0	0	1	1	1	0	0	#NULL!	0	#NULL!	0	#NULL!	0	#NULL!	0	#NULL!	0	#NULL!	0	0	0	0	0	0	-1.47839	2	2	#NULL!
532	s2047	2	28	2	2	1	2	2	#NULL!	1	1100	2	1	1	1	0	0	1	0	1	0	0	1	1	1	1	1	0	#NULL!	0	#NULL!	0	#NULL!	0	#NULL!	0	#NULL!	0	#NULL!	0	0	0	0	0	0	-1.32563	2	1	3
533	s2048	2	22	2	1	1	1	1	500	2	5009	1	2	1	1	1	1	1	1	1	1	1	0	1	0	1	1	1	2	1	2	0	#NULL!	0	#NULL!	0	#NULL!	0	#NULL!	0	0	0	0	0	0	1.78389	4	1	3
534	s2049	2	29	2	2	2	3	2	#NULL!	2	2000	4	2	1	1	1	1	1	0	0	0	1	1	1	1	1	0	0	#NULL!	0	#NULL!	0	#NULL!	0	#NULL!	0	#NULL!	0	#NULL!	0	0	0	0	0	0	0.663761	3	2	#NULL!
535	s2050	2	32	2	2	1	2	2	#NULL!	2	2500	2	2	1	1	0	0	1	0	0	0	0	0	0	0	0	0	1	2	1	2	0	#NULL!	0	#NULL!	0	#NULL!	0	#NULL!	0	0	0	0	0	0	-4.42075	1	1	3
536	s2051	2	23	2	2	2	2	2	#NULL!	1	1000	2	1	1	1	1	1	0	0	0	0	1	0	0	0	0	1	0	#NULL!	0	#NULL!	0	#NULL!	0	#NULL!	0	#NULL!	0	#NULL!	0	0	0	0	0	0	-1.82344	1	1	3
537	s2052	2	26	2	2	1	1	2	#NULL!	1	2000	1	1	1	1	0	0	0	0	0	0	0	1	1	1	1	1	0	#NULL!	0	#NULL!	1	2	0	#NULL!	0	#NULL!	0	#NULL!	0	0	0	0	0	0	0.014944	3	1	3
538	s2053	2	32	2	2	1	2	2	#NULL!	1	2000	2	1	1	1	1	1	1	0	0	1	0	1	0	1	1	1	1	2	1	1	0	#NULL!	0	#NULL!	0	#NULL!	0	#NULL!	0	0	0	0	0	0	-1.19306	2	2	#NULL!
539	s2054	2	24	2	2	1	2	2	#NULL!	3	2100	2	3	0	0	1	0	1	1	1	1	0	0	0	0	0	0	0	#NULL!	0	#NULL!	0	#NULL!	0	#NULL!	0	#NULL!	0	#NULL!	0	0	0	0	0	0	-3.60068	1	2	#NULL!
540	s2055	2	36	3	2	1	2	1	222	2	5000	2	2	0	0	0	0	0	0	0	0	0	0	0	0	1	1	1	12	1	22	0	#NULL!	0	#NULL!	0	#NULL!	0	#NULL!	1	1	0	0	0	0	-3.01362	1	2	#NULL!
541	s2056	2	25	2	2	1	2	2	#NULL!	1	1500	2	1	1	1	1	0	0	0	1	0	0	1	1	0	1	0	0	#NULL!	0	#NULL!	0	#NULL!	0	#NULL!	1	42	1	31	0	0	0	0	1	1	-0.9147	2	1	1
542	s2057	2	33	2	2	1	1	2	#NULL!	1	400	1	1	0	0	0	0	0	0	0	0	0	0	0	0	1	1	1	12	0	#NULL!	0	#NULL!	0	#NULL!	0	#NULL!	0	#NULL!	1	0	0	0	0	0	-4.81814	1	1	3
543	s2058	2	28	2	2	1	2	2	#NULL!	1	1000	2	1	0	0	1	0	1	0	1	0	0	0	0	0	0	0	0	#NULL!	1	42	0	#NULL!	0	#NULL!	0	#NULL!	0	#NULL!	0	1	0	0	0	0	-3.5168	1	1	3
544	s2059	2	29	2	2	1	2	1	2500	1	2500	2	1	1	1	0	0	1	0	1	0	0	0	0	1	0	0	1	4	1	2	0	#NULL!	0	#NULL!	1	6	0	#NULL!	1	0	0	0	1	0	-0.986425	2	1	3
545	s2060	2	29	2	2	1	2	2	#NULL!	1	550	2	1	1	1	0	0	0	0	0	0	0	0	0	1	0	1	0	#NULL!	1	2	1	1	0	#NULL!	0	#NULL!	0	#NULL!	0	0	0	0	0	0	-1.63511	2	1	3
546	s2061	2	34	2	2	1	1	2	#NULL!	1	450	1	1	1	1	1	0	1	0	1	0	0	0	0	1	0	1	1	1	1	4	0	#NULL!	0	#NULL!	0	#NULL!	0	#NULL!	0	1	0	0	0	0	-0.952636	2	2	#NULL!
547	s2062	2	31	2	2	1	2	2	#NULL!	1	1500	2	1	1	1	0	0	1	0	1	0	0	0	0	0	0	0	0	#NULL!	1	2	1	1	0	#NULL!	1	3	1	5	0	0	0	0	0	1	-0.933202	2	1	3
548	s2063	2	23	2	2	1	1	2	#NULL!	1	2600	1	1	1	1	1	0	0	1	1	0	0	1	1	0	1	0	1	2	0	#NULL!	0	#NULL!	0	#NULL!	1	26	1	2	0	0	0	0	1	1	0.012995	3	1	3
549	s2064	2	25	2	2	1	1	2	#NULL!	1	2000	1	1	0	0	1	0	0	1	1	1	1	1	1	1	1	1	1	11	1	2	0	#NULL!	0	#NULL!	1	6	1	12	1	0	0	0	1	1	2.61671	4	1	3
550	s2065	2	22	2	2	1	2	2	#NULL!	1	2200	2	1	1	0	1	0	1	0	1	0	1	1	1	1	1	0	0	#NULL!	0	#NULL!	0	#NULL!	0	#NULL!	0	#NULL!	0	#NULL!	0	0	0	0	0	0	-0.654305	2	2	#NULL!
551	s2066	2	32	2	2	1	2	2	#NULL!	1	1400	2	1	0	1	1	0	1	0	0	0	0	0	0	1	0	0	0	#NULL!	0	#NULL!	0	#NULL!	0	#NULL!	0	#NULL!	0	#NULL!	0	0	0	0	0	0	-4.17389	1	1	3
552	s2067	2	35	2	2	1	3	2	#NULL!	3	2300	4	3	#NULL!	#NULL!	#NULL!	#NULL!	#NULL!	#NULL!	#NULL!	#NULL!	#NULL!	#NULL!	#NULL!	#NULL!	#NULL!	#NULL!	#NULL!	#NULL!	#NULL!	#NULL!	#NULL!	#NULL!	#NULL!	#NULL!	#NULL!	#NULL!	#NULL!	#NULL!	0	0	0	0	0	0	#NULL!	#NULL!	1	4
553	s2068	2	30	2	2	1	3	1	2000	1	3000	4	1	1	1	0	0	0	0	1	0	0	0	1	1	0	1	1	2	0	#NULL!	1	1	1	14	0	#NULL!	0	#NULL!	0	0	0	1	0	0	1.10058	3	1	1
554	s2069	2	30	2	2	1	2	2	#NULL!	1	1000	2	1	1	0	1	0	1	1	0	0	0	1	1	0	0	1	0	#NULL!	0	#NULL!	0	#NULL!	0	#NULL!	0	#NULL!	0	#NULL!	0	0	0	0	0	0	-2.54269	1	1	3
555	s2070	2	30	2	2	2	1	2	#NULL!	1	3000	1	1	0	0	0	0	0	0	0	0	0	0	1	0	1	0	0	#NULL!	0	#NULL!	0	#NULL!	0	#NULL!	0	#NULL!	0	#NULL!	0	0	0	0	0	0	-4.869	1	1	4
556	s2071	2	24	2	1	1	2	2	#NULL!	2	480	2	2	1	1	1	0	1	0	1	0	1	0	1	1	1	1	1	4	1	3	0	#NULL!	0	#NULL!	1	14	0	#NULL!	1	1	0	0	1	0	3.68638	4	1	3
557	s2072	2	30	2	2	1	2	2	#NULL!	2	5000	2	2	0	0	0	0	0	0	0	0	0	1	0	0	0	1	1	12	1	2	1	2	0	#NULL!	0	#NULL!	0	#NULL!	1	0	0	0	0	0	-2.49837	1	2	#NULL!
558	s2073	2	34	2	2	1	1	2	#NULL!	1	2500	1	1	1	1	0	0	1	1	1	0	0	0	1	0	0	1	1	1	0	#NULL!	0	#NULL!	0	#NULL!	0	#NULL!	0	#NULL!	0	0	0	0	0	0	-1.60637	2	1	4
559	s2074	2	32	2	2	2	2	2	#NULL!	3	2000	2	3	1	1	0	0	1	0	1	0	0	0	1	0	0	0	0	#NULL!	0	#NULL!	0	#NULL!	0	#NULL!	0	#NULL!	0	#NULL!	0	0	0	0	0	0	-2.53406	1	2	#NULL!
560	s2075	2	36	3	2	1	2	2	#NULL!	1	1000	2	1	0	1	1	0	0	0	1	0	1	0	1	0	1	0	1	3	1	1	0	#NULL!	1	4	1	4	0	#NULL!	1	0	0	1	1	0	1.08489	3	2	#NULL!
561	s2076	2	32	2	2	1	1	2	#NULL!	2	2000	1	2	1	1	0	0	0	1	0	0	0	0	1	0	0	1	0	#NULL!	0	#NULL!	0	#NULL!	0	#NULL!	0	#NULL!	0	#NULL!	0	0	0	0	0	0	-2.21429	1	1	3
562	s2077	2	30	2	2	1	1	2	#NULL!	1	1000	1	1	1	1	0	0	0	0	0	1	0	0	0	0	1	1	0	#NULL!	1	22	0	#NULL!	0	#NULL!	0	#NULL!	0	#NULL!	0	1	0	0	0	0	-1.82329	1	1	3
563	s2078	2	25	2	2	1	2	2	#NULL!	1	1000	2	1	0	1	0	1	0	1	0	0	0	0	0	1	0	0	1	22	0	#NULL!	0	#NULL!	0	#NULL!	0	#NULL!	0	#NULL!	1	0	0	0	0	0	-1.1273	2	1	3
564	s2079	2	25	2	2	1	1	2	#NULL!	1	2800	1	1	0	0	0	0	1	1	0	0	0	1	1	1	0	0	0	#NULL!	0	#NULL!	0	#NULL!	0	#NULL!	0	#NULL!	0	#NULL!	0	0	0	0	0	0	-2.73287	1	1	3
565	s2080	2	30	2	2	1	2	2	#NULL!	1	1000	2	1	1	0	1	0	1	1	1	0	0	1	0	1	0	0	0	#NULL!	0	#NULL!	0	#NULL!	0	#NULL!	0	#NULL!	0	#NULL!	0	0	0	0	0	0	-2.37638	1	1	3
566	s2081	1	31	2	2	1	2	2	#NULL!	1	1000	2	1	1	1	0	0	0	0	1	0	1	0	1	1	1	1	0	#NULL!	0	#NULL!	0	#NULL!	0	#NULL!	0	#NULL!	0	#NULL!	0	0	0	0	0	0	-0.325905	2	2	#NULL!
567	s2082	1	22	2	2	1	1	2	#NULL!	1	35011	1	1	0	0	0	0	0	0	0	0	0	0	0	0	0	1	0	#NULL!	0	#NULL!	0	#NULL!	0	#NULL!	0	#NULL!	0	#NULL!	0	0	0	0	0	0	-6.14776	1	2	#NULL!
568	s2083	2	28	2	2	1	2	2	#NULL!	2	600	2	2	1	0	0	0	0	1	0	0	0	0	0	0	0	0	0	#NULL!	0	#NULL!	0	#NULL!	0	#NULL!	0	#NULL!	0	#NULL!	0	0	0	0	0	0	-4.41126	1	1	3
569	s2084	2	30	2	2	1	2	1	222	1	2000	2	1	1	1	1	1	1	1	1	1	1	1	1	1	0	1	0	#NULL!	0	#NULL!	0	#NULL!	0	#NULL!	0	#NULL!	0	#NULL!	0	0	0	0	0	0	2.99232	4	1	3
570	s2085	2	25	2	2	4	3	1	460	1	2000	3	1	0	0	0	0	0	0	0	0	0	0	0	1	1	1	1	22	0	#NULL!	0	#NULL!	0	#NULL!	0	#NULL!	0	#NULL!	1	0	0	0	0	0	-3.98099	1	1	4
571	s2087	1	19	1	2	1	1	2	#NULL!	1	2000	1	1	1	1	1	0	0	0	0	1	0	1	0	1	0	0	0	#NULL!	0	#NULL!	0	#NULL!	0	#NULL!	0	#NULL!	0	#NULL!	0	0	0	0	0	0	-2.20085	1	1	3
572	s2086	1	28	2	2	1	2	2	#NULL!	2	1100	2	2	0	0	0	0	0	0	0	0	1	0	1	0	1	0	0	#NULL!	0	#NULL!	0	#NULL!	0	#NULL!	0	#NULL!	0	#NULL!	0	0	0	0	0	0	-3.49799	1	2	#NULL!
573	s2088	2	28	2	2	1	1	2	#NULL!	1	350	1	1	0	0	0	0	1	0	0	0	0	1	0	0	0	0	1	2	1	21	0	#NULL!	0	#NULL!	0	#NULL!	0	#NULL!	0	1	0	0	0	0	-3.97196	1	2	#NULL!
574	s2089	1	25	2	2	1	1	2	#NULL!	1	3000	1	1	0	0	0	0	0	0	0	0	0	0	0	1	0	1	0	#NULL!	0	#NULL!	0	#NULL!	0	#NULL!	0	#NULL!	0	#NULL!	0	0	0	0	0	0	-5.31061	1	2	#NULL!
575	s2090	1	22	2	1	1	2	2	#NULL!	1	1500	2	1	0	1	1	0	1	0	1	1	1	1	0	1	0	0	0	#NULL!	0	#NULL!	0	#NULL!	0	#NULL!	0	#NULL!	0	#NULL!	0	0	0	0	0	0	-1.03073	2	2	#NULL!
576	s2091	1	32	2	2	1	1	2	#NULL!	1	8000	1	1	0	0	0	0	1	1	1	0	1	0	1	0	1	1	1	22	0	#NULL!	0	#NULL!	0	#NULL!	0	#NULL!	0	#NULL!	1	0	0	0	0	0	-0.632755	2	1	3
577	s2092	1	28	2	2	2	1	2	#NULL!	1	3000	1	1	1	1	1	1	1	1	0	0	0	0	0	0	1	0	0	#NULL!	0	#NULL!	0	#NULL!	0	#NULL!	0	#NULL!	0	#NULL!	0	0	0	0	0	0	-2.26675	1	1	3
578	s2093	1	31	2	2	1	2	2	#NULL!	1	1300	2	1	1	1	1	0	0	0	1	0	0	0	0	0	0	0	0	#NULL!	0	#NULL!	0	#NULL!	0	#NULL!	0	#NULL!	0	#NULL!	0	0	0	0	0	0	-3.59431	1	1	3
579	s2094	2	20	2	2	1	1	2	#NULL!	1	500	1	1	1	0	0	1	0	0	0	0	1	1	1	1	1	0	0	#NULL!	0	#NULL!	0	#NULL!	0	#NULL!	0	#NULL!	0	#NULL!	0	0	0	0	0	0	-0.472961	2	1	3
580	s2095	2	25	2	2	1	1	2	#NULL!	1	5000	1	1	1	1	1	1	1	1	1	1	1	1	1	1	0	1	1	1	0	#NULL!	0	#NULL!	0	#NULL!	0	#NULL!	0	#NULL!	0	0	0	0	0	0	2.99232	4	1	1
581	s2096	2	25	2	1	1	2	1	2000	1	3000	2	1	1	1	1	1	1	1	1	1	1	1	1	1	1	0	0	#NULL!	0	#NULL!	0	#NULL!	0	#NULL!	0	#NULL!	0	#NULL!	0	0	0	0	0	0	2.99232	4	1	1
582	s2097	2	26	2	1	1	1	2	#NULL!	1	1000	1	1	0	0	0	0	0	0	0	0	0	1	1	0	1	0	0	#NULL!	0	#NULL!	0	#NULL!	0	#NULL!	0	#NULL!	0	#NULL!	0	0	0	0	0	0	-4.49772	1	1	3
583	s2098	2	25	2	2	1	1	2	#NULL!	1	1000	1	1	1	1	1	1	1	1	1	1	1	1	1	1	1	0	1	2	0	#NULL!	0	#NULL!	0	#NULL!	0	#NULL!	0	#NULL!	0	0	0	0	0	0	2.99232	4	1	3
584	s2099	2	30	2	2	1	2	2	#NULL!	2	2500	2	2	0	1	1	1	0	0	0	0	0	0	0	0	1	0	1	22	0	#NULL!	0	#NULL!	0	#NULL!	0	#NULL!	0	#NULL!	1	0	0	0	0	0	-2.67363	1	1	4
585	s2100	2	25	2	2	1	2	2	#NULL!	2	5000	2	2	1	0	0	0	0	0	0	0	1	1	0	0	1	0	0	#NULL!	0	#NULL!	0	#NULL!	0	#NULL!	0	#NULL!	1	1	0	0	0	0	0	0	-3.23358	1	2	#NULL!
586	s2102	2	21	2	2	1	2	2	#NULL!	2	2000	2	2	1	1	1	1	1	1	1	1	1	1	0	0	1	0	0	#NULL!	0	#NULL!	0	#NULL!	0	#NULL!	0	#NULL!	0	#NULL!	0	0	0	0	0	0	0.876402	3	1	3
587	s2101	1	27	2	2	1	1	2	#NULL!	3	300	1	3	1	1	0	1	0	1	0	1	0	0	1	0	0	0	0	#NULL!	0	#NULL!	0	#NULL!	0	#NULL!	0	#NULL!	0	#NULL!	0	0	0	0	0	0	-0.41356	2	1	3
588	s1180	2	27	2	1	1	2	2	#NULL!	1	2000	2	1	1	1	1	1	1	1	1	1	1	1	1	1	1	1	1	22	0	#NULL!	0	#NULL!	0	#NULL!	0	#NULL!	0	#NULL!	1	0	0	0	0	0	4.32195	4	1	3
589	s1181	2	30	2	2	1	2	2	#NULL!	2	2000	2	2	1	1	1	1	1	1	1	1	1	1	1	1	1	1	1	22	0	#NULL!	0	#NULL!	0	#NULL!	0	#NULL!	0	#NULL!	1	0	0	0	0	0	4.32195	4	1	3
[truncated: 137 more columns]
